# Supplementary material for: ACE Inhibition with Captopril Retards the Development of Signs of Neurodegeneration in an Animal Model of Alzheimer’s Disease
Source: Int J Mol Sci. 2013 Aug 16;14(8):16917–42. doi: 10.3390/ijms140816917 (PMC3759943; doi:10.3390/ijms140816917)
Supplement: Supplementary File 1 — Supplementary1 (XLS, 2289 KB) [file ijms-14-16917-s001.xls]

## Sheet: Blatt1
Table S1. Probe sets (Affymetrix GeneChip Mouse Genome Mg430 2.0 Array) with significantly increased signal intensity value in hippocampi of 18 month-old captopril-treated Tg2576 mice (Tg-18mo-ACEI) compared to age-matched untreated controls (Tg-18mo). Signal intensity values are given as mean (n=2 gene chips/group, with RNA from four mice pooled for one gene chip). Selection criteria for differe…
Affymetrix-ID	Descriptions	Mean-Tg-18mo	Mean-Tg-18mo-ACEI	Raw p value	Fold change (ratio Tg-18mo-ACEI/Tg-18mo)	Gene name
1418188_a_at	gb:AA560093 /DB_XREF=gi:2331558 /DB_XREF=vl29d03.r1 /CLONE=IMAGE:973637 /FEA=FLmRNA /CNT=85 /TID=Mm.218611.1 /TIER=ConsEnd /STK=0 /UG=Mm.218611 /LL=54409 /UG_GENE=Ramp2 /UG_TITLE=receptor (calcitonin) activity modifying protein 2 /FL=gb:AF146523.1 gb:AF209906.1 gb:NM_019444.1	89.75	975.05	0.000630152	10.8641	Ramp2
1436850_at	gb:AV338277 /DB_XREF=gi:16396655 /DB_XREF=AV338277 /CLONE=6430408F09 /FEA=EST /CNT=85 /TID=Mm.122091.1 /TIER=Stack /STK=43 /UG=Mm.122091 /UG_TITLE=ESTs, Weakly similar to cellular repressor of E1A-stimulated genes (Mus musculus) (M.musculus)	100.6	954.9	0.0064424	9.49205	Creg2
1439757_s_at	gb:AI385584 /DB_XREF=gi:4199047 /DB_XREF=mb18d08.x1 /CLONE=IMAGE:329775 /FEA=EST /CNT=7 /TID=Mm.200233.1 /TIER=ConsEnd /STK=7 /UG=Mm.200233 /LL=98323 /UG_GENE=AI385584 /UG_TITLE=expressed sequence AI385584	378.65	3333.25	0.00039145	8.80298	Epha4
1437305_at	gb:AV296864 /DB_XREF=gi:16392878 /DB_XREF=AV296864 /CLONE=5730444M17 /FEA=EST /CNT=32 /TID=Mm.132523.2 /TIER=Stack /STK=20 /UG=Mm.132523 /UG_TITLE=ESTs, Weakly similar to zinc finger protein 319 (Mus musculus) (M.musculus)	48.6	425.25	0.000644022	8.75	Zfp770
1438269_at	gb:BB278987 /DB_XREF=gi:16401126 /DB_XREF=BB278987 /CLONE=A930014K01 /FEA=EST /CNT=19 /TID=Mm.132765.1 /TIER=Stack /STK=11 /UG=Mm.132765 /UG_TITLE=ESTs, Weakly similar to S41647 zinc finger 5 protein - mouse (M.musculus)	16.95	148.3	0.00697575	8.74926	Zbtb38
1450906_at	gb:BB476707 /DB_XREF=gi:16440201 /DB_XREF=BB476707 /CLONE=D330020O18 /FEA=FLmRNA /CNT=106 /TID=Mm.103764.1 /TIER=Stack /STK=13 /UG=Mm.103764 /LL=54712 /UG_GENE=Plxnc1 /UG_TITLE=plexin C1 /FL=gb:NM_018797.1 gb:AF190578.1	58.6	510.55	0.00329107	8.71246	Plxnc1
1456863_at	gb:AI385584 /DB_XREF=gi:4199047 /DB_XREF=mb18d08.x1 /CLONE=IMAGE:329775 /FEA=EST /CNT=7 /TID=Mm.200233.1 /TIER=ConsEnd /STK=7 /UG=Mm.200233 /LL=98323 /UG_GENE=AI385584 /UG_TITLE=expressed sequence AI385584	97.7	840.75	0.0056837	8.60542	Epha4
1440290_at	gb:AW494128 /DB_XREF=gi:7064409 /DB_XREF=UI-M-BH3-auj-a-02-0-UI.s1 /CLONE=UI-M-BH3-auj-a-02-0-UI /FEA=EST /CNT=8 /TID=Mm.101361.1 /TIER=ConsEnd /STK=5 /UG=Mm.101361 /UG_TITLE=ESTs	14.55	125	0.00896168	8.59107	Gm10010
1447869_x_at	gb:AV047988 /DB_XREF=gi:4867653 /DB_XREF=AV047988 /CLONE=1700072E02 /FEA=EST /CNT=2 /TID=Mm.84884.1 /TIER=ConsEnd /STK=2 /UG=Mm.84884 /UG_TITLE=ESTs, Moderately similar to KIAA0878 protein (H.sapiens)	40.45	346.35	9.49152e-05	8.56242	Rhobtb3
1450035_a_at	gb:BG064340 /DB_XREF=gi:12546903 /DB_XREF=H3018D11-3 /CLONE=H3018D11 /FEA=FLmRNA /CNT=123 /TID=Mm.87658.1 /TIER=Stack /STK=42 /UG=Mm.87658 /LL=56194 /UG_GENE=Fnbp3 /UG_TITLE=formin binding protein 3 /FL=gb:AF135439.1 gb:NM_018785.1	89.8	741.6	0.00129971	8.25835	Fnbp3
1420947_at	gb:BM225096 /DB_XREF=gi:17786581 /DB_XREF=K0206C03-3 /CLONE=K0206C03 /FEA=FLmRNA /CNT=165 /TID=Mm.10141.1 /TIER=Stack /STK=9 /UG=Mm.10141 /LL=22589 /UG_GENE=Xnp /UG_TITLE=X-linked nuclear protein /FL=gb:NM_009530.1 gb:AF026032.1	137.05	1125.4	0.00184888	8.2116	Xnp
1450051_at	gb:BB825830 /DB_XREF=gi:17004073 /DB_XREF=BB825830 /CLONE=G830039N23 /FEA=FLmRNA /CNT=165 /TID=Mm.10141.1 /TIER=Stack /STK=31 /UG=Mm.10141 /LL=22589 /UG_GENE=Xnp /UG_TITLE=X-linked nuclear protein /FL=gb:NM_009530.1 gb:AF026032.1	71.25	567.6	0.00357785	7.96632	Xnp
1419085_at	gb:NM_008790.1 /DB_XREF=gi:6679224 /GEN=Pcp2 /FEA=FLmRNA /CNT=15 /TID=Mm.41456.1 /TIER=FL+Stack /STK=14 /UG=Mm.41456 /LL=18545 /DEF=Mus musculus Purkinje cell protein 2 (L7) (Pcp2), mRNA. /PROD=Purkinje cell protein 2 (L7) /FL=gb:NM_008790.1 gb:M21532.1	38.65	281.3	0.000592937	7.27814	Pcp2
1442867_at	gb:BQ174216 /DB_XREF=gi:20349707 /DB_XREF=UI-M-DJ2-bvw-m-07-0-UI.s1 /CLONE=UI-M-DJ2-bvw-m-07-0-UI /FEA=EST /CNT=4 /TID=Mm.194351.1 /TIER=ConsEnd /STK=3 /UG=Mm.194351 /UG_TITLE=ESTs	99.2	719.7	0.00167326	7.25504	Megf11
1437107_at	gb:BB398063 /DB_XREF=gi:16412364 /DB_XREF=BB398063 /CLONE=C330006L04 /FEA=EST /CNT=110 /TID=Mm.193647.1 /TIER=Stack /STK=13 /UG=Mm.193647 /LL=52848 /UG_GENE=D9Bwg0185e /UG_TITLE=DNA segment, Chr 9, Brigham & Womens Genetics 0185 expressed	371.45	2670	2.54417e-05	7.18805	Rab6b
1437047_at	gb:BB527190 /DB_XREF=gi:16444440 /DB_XREF=BB527190 /CLONE=D930038J03 /FEA=EST /CNT=32 /TID=Mm.138617.1 /TIER=Stack /STK=28 /UG=Mm.138617 /UG_TITLE=ESTs	18.7	132.7	0.00178736	7.09626	Zfp664
1418189_s_at	gb:AA560093 /DB_XREF=gi:2331558 /DB_XREF=vl29d03.r1 /CLONE=IMAGE:973637 /FEA=FLmRNA /CNT=85 /TID=Mm.218611.1 /TIER=ConsEnd /STK=0 /UG=Mm.218611 /LL=54409 /UG_GENE=Ramp2 /UG_TITLE=receptor (calcitonin) activity modifying protein 2 /FL=gb:AF146523.1 gb:AF209906.1 gb:NM_019444.1	320.55	2245.3	0.00078773	7.00452	Ramp2
1436746_at	gb:BI692255 /DB_XREF=gi:15654884 /DB_XREF=603342721F1 /CLONE=IMAGE:5370700 /FEA=EST /CNT=96 /TID=Mm.27341.1 /TIER=Stack /STK=69 /UG=Mm.27341 /UG_TITLE=ESTs, Moderately similar to protein kinase, lysine deficient 1 (Rattus norvegicus) (R.norvegicus)	533.65	3708.7	0.000283227	6.94969	Wnk1
1424598_at	gb:BC021452.1 /DB_XREF=gi:18203916 /FEA=FLmRNA /CNT=56 /TID=Mm.157743.1 /TIER=FL+Stack /STK=23 /UG=Mm.157743 /LL=13209 /UG_GENE=Ddx6 /DEF=Mus musculus, DEAD (aspartate-glutamate-alanine-aspartate) box polypeptide 6, clone MGC:29113 IMAGE:5043599, mRNA, complete cds. /PROD=DEAD (aspartate-glutamate-alanine-aspartate) boxpolypeptide 6 /FL=gb:BC021452.1	406.15	2795.8	0.000210448	6.88366	Ddx6
1438363_at	gb:BB332375 /DB_XREF=gi:9041138 /DB_XREF=BB332375 /CLONE=B730047G02 /FEA=EST /CNT=11 /TID=Mm.131907.1 /TIER=Stack /STK=11 /UG=Mm.131907 /UG_TITLE=ESTs, Weakly similar to KIAA1183 protein (H.sapiens)	136.3	917.7	0.000998566	6.73294	BB332375
1441728_at	gb:BI731739 /DB_XREF=gi:15708752 /DB_XREF=603353512F1 /CLONE=IMAGE:5361050 /FEA=EST /CNT=4 /TID=Mm.206118.1 /TIER=ConsEnd /STK=4 /UG=Mm.206118 /UG_TITLE=ESTs, Moderately similar to voltage gated Na channel Scn8a (M.musculus)	79.1	526.45	0.000107364	6.6555	Scn1a
1450771_at	gb:NM_010243.1 /DB_XREF=gi:6753921 /GEN=Fut9 /FEA=FLmRNA /CNT=50 /TID=Mm.20448.1 /TIER=FL+Stack /STK=10 /UG=Mm.20448 /LL=14348 /DEF=Mus musculus fucosyltransferase 9 (Fut9), mRNA. /PROD=fucosyltransferase 9 /FL=gb:AB015426.1 gb:NM_010243.1	132.15	859.25	0.00350274	6.50208	Fut9
1421933_at	gb:BC004707.1 /DB_XREF=gi:13435680 /FEA=FLmRNA /CNT=94 /TID=Mm.28003.1 /TIER=FL+Stack /STK=11 /UG=Mm.28003 /LL=12419 /UG_GENE=Cbx5 /DEF=Mus musculus, chromobox homolog 5 (Drosophila HP1a), clone MGC:5952 IMAGE:3499489, mRNA, complete cds. /PROD=chromobox homolog 5 (Drosophila HP1a) /FL=gb:NM_007626.1 gb:AF216290.1 gb:BC004707.1	58.5	353.5	0.00113853	6.04274	Cbx5
1450120_at	gb:NM_018733.1 /DB_XREF=gi:9055327 /GEN=Scn1a /FEA=FLmRNA /CNT=29 /TID=Mm.142733.1 /TIER=FL /STK=2 /UG=Mm.142733 /LL=20265 /DEF=Mus musculus sodium channel, voltage-gated, type I, alpha polypeptide (Scn1a), mRNA. /PROD=sodium channel, voltage-gated, type I, alphapolypeptide /FL=gb:NM_018733.1 gb:L42339.1	217.4	1309.6	0.00164412	6.02392	Scn1a
1425521_at	gb:BC019726.1 /DB_XREF=gi:18044019 /FEA=FLmRNA /CNT=63 /TID=Mm.25450.1 /TIER=FL /STK=1 /UG=Mm.25450 /DEF=Mus musculus, Similar to polyadenylate binding protein-interacting protein 1, clone MGC:30858 IMAGE:4010170, mRNA, complete cds. /PROD=Similar to polyadenylate bindingprotein-interacting protein 1 /FL=gb:BC019726.1	37.9	227.9	0.00397896	6.01319	Paip1
1415824_at	gb:BG060909 /DB_XREF=gi:12529872 /DB_XREF=L0900C01-5 /CLONE=L0900C01 /FEA=FLmRNA /CNT=525 /TID=Mm.193096.1 /TIER=Stack /STK=13 /UG=Mm.193096 /LL=20250 /UG_GENE=Scd2 /UG_TITLE=stearoyl-Coenzyme A desaturase 2 /FL=gb:NM_009128.1 gb:M26270.1	878.45	5153.7	0.000658432	5.86681	Scd2
1440437_at	gb:BM247513 /DB_XREF=gi:17882783 /DB_XREF=K0803B04-3 /CLONE=K0803B04 /FEA=EST /CNT=6 /TID=Mm.214695.1 /TIER=ConsEnd /STK=5 /UG=Mm.214695 /UG_TITLE=ESTs, Highly similar to guanine nucleotide exchange factor p532 (H.sapiens)	30.25	176	0.00599722	5.81818	Herc1
1421929_at	gb:BB706548 /DB_XREF=gi:16055383 /DB_XREF=BB706548 /CLONE=7420491D14 /FEA=FLmRNA /CNT=39 /TID=Mm.3249.1 /TIER=Stack /STK=18 /UG=Mm.3249 /LL=13838 /UG_GENE=Epha4 /UG_TITLE=Eph receptor A4 /FL=gb:NM_007936.1 gb:BC004782.1	413	2338.75	0.00327791	5.66283	Epha4
1450849_at	gb:BF228203 /DB_XREF=gi:11136298 /DB_XREF=uz41b07.x1 /CLONE=IMAGE:3671605 /FEA=FLmRNA /CNT=610 /TID=Mm.2115.1 /TIER=Stack /STK=11 /UG=Mm.2115 /LL=51810 /UG_GENE=Hnrpu /UG_TITLE=heterogeneous nuclear ribonucleoprotein U /FL=gb:NM_016805.1 gb:AF073992.1 gb:BC018353.1	662.85	3722.9	0.000242702	5.6165	Hnrpu
1459984_at	gb:AI552688 /DB_XREF=gi:4485051 /DB_XREF=mm03c11.y1 /CLONE=IMAGE:520436 /FEA=EST /CNT=5 /TID=Mm.41152.3 /TIER=ConsEnd /STK=0 /UG=Mm.41152 /UG_TITLE=ESTs, Weakly similar to otoraplin (Mus musculus) (M.musculus)	135.35	753.55	0.00319757	5.56742	Mia3
1418018_at	gb:NM_007754.1 /DB_XREF=gi:6681000 /GEN=Cpd /FEA=FLmRNA /CNT=113 /TID=Mm.20910.1 /TIER=FL+Stack /STK=31 /UG=Mm.20910 /LL=12874 /DEF=Mus musculus carboxypeptidase D (Cpd), mRNA. /PROD=carboxypeptidase D /FL=gb:NM_007754.1 gb:D85391.1	420.25	2339.2	0.000547584	5.56621	Cpd
1453791_at	gb:BB648310 /DB_XREF=gi:16482566 /DB_XREF=BB648310 /CLONE=C130007N19 /FEA=mRNA /CNT=8 /TID=Mm.53761.1 /TIER=ConsEnd /STK=0 /UG=Mm.53761 /LL=72758 /UG_GENE=2810449C10Rik /UG_TITLE=RIKEN cDNA 2810449C10 gene	22.3	123.25	0.000344472	5.52691	2810449C10Rik
1458685_at	gb:BB552367 /DB_XREF=gi:16448153 /DB_XREF=BB552367 /CLONE=E230037G09 /FEA=EST /CNT=4 /TID=Mm.208592.1 /TIER=ConsEnd /STK=2 /UG=Mm.208592 /UG_TITLE=ESTs	26.6	146.85	0.00247861	5.52068	Ralgapa1
1444228_s_at	gb:BB333568 /DB_XREF=gi:9042331 /DB_XREF=BB333568 /CLONE=B830013K01 /FEA=EST /CNT=5 /TID=Mm.188291.1 /TIER=ConsEnd /STK=2 /UG=Mm.188291 /UG_TITLE=ESTs, Moderately similar to T14346 Herc2 protein - mouse (M.musculus)	28.75	158.55	0.00124913	5.51478	Herc2
1457800_at	gb:AW122190 /DB_XREF=gi:6097643 /DB_XREF=UI-M-BH2.2-aov-b-01-0-UI.s1 /CLONE=UI-M-BH2.2-aov-b-01-0-UI /FEA=EST /CNT=5 /TID=Mm.150668.1 /TIER=ConsEnd /STK=3 /UG=Mm.150668 /UG_TITLE=ESTs	313.6	1700.15	0.00297223	5.4214	UI-M-BH2.2-aov-b-01-0-UI.s1
1448747_at	gb:AF441120.1 /DB_XREF=gi:17940317 /GEN=Atrogin1 /FEA=FLmRNA /CNT=90 /TID=Mm.40466.1 /TIER=FL+Stack /STK=14 /UG=Mm.40466 /LL=67731 /DEF=Mus musculus ATROGIN1 (Atrogin1) mRNA, complete cds. /PROD=ATROGIN1 /FL=gb:AF441120.1 gb:NM_026346.1 gb:BC027211.1	144.2	765.1	0.000516929	5.30583	Atrogin1
1438207_at	gb:BB744704 /DB_XREF=gi:16147643 /DB_XREF=BB744704 /CLONE=F530004J11 /FEA=EST /CNT=39 /TID=Mm.44823.1 /TIER=Stack /STK=11 /UG=Mm.44823 /LL=107338 /UG_GENE=AW049900 /UG_TITLE=expressed sequence AW049900	95.45	506.15	0.00292288	5.30278	Gbf1
1423066_at	gb:BB702511 /DB_XREF=gi:16051335 /DB_XREF=BB702511 /CLONE=7420441O20 /FEA=FLmRNA /CNT=313 /TID=Mm.5001.1 /TIER=Stack /STK=9 /UG=Mm.5001 /LL=13435 /UG_GENE=Dnmt3a /UG_TITLE=DNA methyltransferase 3A /FL=gb:BC007466.1 gb:AF068625.2 gb:NM_007872.1	26.65	140.3	0.00421473	5.26454	Dnmt3a
1449292_at	gb:BE570980 /DB_XREF=gi:9814700 /DB_XREF=601328846F1 /CLONE=IMAGE:3602843 /FEA=FLmRNA /CNT=178 /TID=Mm.141567.1 /TIER=Stack /STK=36 /UG=Mm.141567 /LL=12421 /UG_GENE=Cc1 /UG_TITLE=coiled coil forming protein 1 /FL=gb:AB050017.2 gb:AB070619.1 gb:NM_009826.1	186.3	971.05	0.00550563	5.21229	Cc1
1456271_at	gb:BB039066 /DB_XREF=gi:16258528 /DB_XREF=BB039066 /CLONE=6030419C24 /FEA=EST /CNT=14 /TID=Mm.138402.1 /TIER=Stack /STK=12 /UG=Mm.138402 /UG_TITLE=ESTs	23.2	120	0.00196851	5.17241	Garem
1456621_at	gb:BB745929 /DB_XREF=gi:16148866 /DB_XREF=BB745929 /CLONE=F530012H08 /FEA=EST /CNT=15 /TID=Mm.164983.1 /TIER=Stack /STK=8 /UG=Mm.164983 /UG_TITLE=ESTs, Moderately similar to KIAA0914 protein (H.sapiens)	29.2	150	0.00103793	5.13699	Fam13a
1457432_at	gb:BB357661 /DB_XREF=gi:9069489 /DB_XREF=BB357661 /CLONE=C030023G16 /FEA=EST /CNT=5 /TID=Mm.197632.1 /TIER=ConsEnd /STK=4 /UG=Mm.197632 /UG_TITLE=ESTs	51.55	263.8	0.00290437	5.11736	Prox1
1436894_at	gb:BB324138 /DB_XREF=gi:16403492 /DB_XREF=BB324138 /CLONE=B430104L18 /FEA=EST /CNT=44 /TID=Mm.101743.1 /TIER=Stack /STK=38 /UG=Mm.101743 /UG_TITLE=ESTs	48.25	246.25	0.00106106	5.10363	Ildr2
1439300_at	gb:BG065782 /DB_XREF=gi:12548345 /DB_XREF=H3035C01-3 /CLONE=H3035C01 /FEA=EST /CNT=8 /TID=Mm.132500.1 /TIER=Stack /STK=8 /UG=Mm.132500 /UG_TITLE=ESTs	333.35	1670.1	0.00113903	5.01005	Brx
1423065_at	gb:BB044612 /DB_XREF=gi:15403931 /DB_XREF=BB044612 /CLONE=6030489E13 /FEA=FLmRNA /CNT=313 /TID=Mm.5001.1 /TIER=Stack /STK=10 /UG=Mm.5001 /LL=13435 /UG_GENE=Dnmt3a /UG_TITLE=DNA methyltransferase 3A /FL=gb:BC007466.1 gb:AF068625.2 gb:NM_007872.1	101.25	497.85	0.00306691	4.91704	Dnmt3a
1418469_at	gb:AV272221 /DB_XREF=gi:16390145 /DB_XREF=AV272221 /CLONE=4931421O04 /FEA=FLmRNA /CNT=78 /TID=Mm.20895.1 /TIER=Stack /STK=8 /UG=Mm.20895 /LL=18184 /UG_GENE=Nrip1 /UG_TITLE=nuclear receptor interacting protein 1 /FL=gb:NM_008735.1 gb:AF053062.1	287.15	1402.5	0.000241653	4.88421	Nrip1
1420837_at	gb:NM_008745.1 /DB_XREF=gi:6679149 /GEN=Ntrk2 /FEA=FLmRNA /CNT=136 /TID=Mm.3993.1 /TIER=FL /STK=2 /UG=Mm.3993 /LL=18212 /DEF=Mus musculus neurotrophic tyrosine kinase, receptor, type 2 (Ntrk2), mRNA. /PROD=neurotrophic tyrosine kinase, receptor, type 2 /FL=gb:M33385.1 gb:NM_008745.1	33.05	159.6	0.00263143	4.82905	Ntrk2
1455445_at	gb:BB800230 /DB_XREF=gi:16969853 /DB_XREF=BB800230 /CLONE=G630028K16 /FEA=EST /CNT=16 /TID=Mm.44427.1 /TIER=Stack /STK=13 /UG=Mm.44427 /UG_TITLE=ESTs	28.2	135.45	0.00667144	4.80319	Cbln3
1452722_a_at	gb:BB702110 /DB_XREF=gi:16050934 /DB_XREF=BB702110 /CLONE=7420437M16 /FEA=mRNA /CNT=238 /TID=Mm.46579.1 /TIER=Stack /STK=62 /UG=Mm.46579 /LL=75717 /UG_GENE=4921514I20Rik /UG_TITLE=RIKEN cDNA 4921514I20 gene	147.5	705.5	0.0014954	4.78305	Cul5
1453246_at	gb:AK020665.1 /DB_XREF=gi:12861316 /FEA=mRNA /CNT=20 /TID=Mm.103532.1 /TIER=Stack /STK=10 /UG=Mm.103532 /LL=67790 /UG_GENE=6330580M05Rik /UG_TITLE=RIKEN cDNA 6330580M05 gene /DEF=Mus musculus 16 days neonate cerebellum cDNA, RIKEN full-length enriched library, clone:9630001B09:homolog to RAB-RELATED GTP-BINDING PROTEIN (FRAGMENT), full insert sequence.	249.25	1191.25	0.00905457	4.77934	Rab39b
1420917_at	gb:BG064340 /DB_XREF=gi:12546903 /DB_XREF=H3018D11-3 /CLONE=H3018D11 /FEA=FLmRNA /CNT=123 /TID=Mm.87658.1 /TIER=Stack /STK=42 /UG=Mm.87658 /LL=56194 /UG_GENE=Fnbp3 /UG_TITLE=formin binding protein 3 /FL=gb:AF135439.1 gb:NM_018785.1	51.5	244.75	0.00223859	4.75243	Fnbp3
1442695_at	gb:AW494399 /DB_XREF=gi:7064680 /DB_XREF=UI-M-BH3-aul-h-10-0-UI.s1 /CLONE=UI-M-BH3-aul-h-10-0-UI /FEA=EST /CNT=4 /TID=Mm.101028.1 /TIER=ConsEnd /STK=3 /UG=Mm.101028 /UG_TITLE=ESTs	69.85	330.95	0.000783157	4.73801	C030007I01Rik
1430561_at	gb:BE952491 /DB_XREF=gi:10592997 /DB_XREF=UI-M-CE0-azc-d-08-0-UI.s1 /CLONE=UI-M-CE0-azc-d-08-0-UI /FEA=mRNA /CNT=28 /TID=Mm.30934.1 /TIER=ConsEnd /STK=1 /UG=Mm.30934 /LL=70604 /UG_GENE=5730496F10Rik /UG_TITLE=RIKEN cDNA 5730496F10 gene	735.9	3473.15	0.00276624	4.7196	Dnajb14
1423597_at	gb:BB303874 /DB_XREF=gi:15411244 /DB_XREF=BB303874 /CLONE=B230107D19 /FEA=FLmRNA /CNT=81 /TID=Mm.33083.1 /TIER=Stack /STK=9 /UG=Mm.33083 /LL=11980 /UG_GENE=Atp8a1 /UG_TITLE=ATPase, aminophospholipid transporter (APLT), class I, type 8A, member 1 /FL=gb:NM_009727.1 gb:U75321.1	1472.45	6920.6	0.000191246	4.70006	Atp3a2
1427488_a_at	gb:BC026990.1 /DB_XREF=gi:20071952 /FEA=mRNA /CNT=9 /TID=Mm.12921.2 /TIER=ConsEnd /STK=0 /UG=Mm.12921 /LL=12211 /UG_GENE=Birc6 /UG_TITLE=baculoviral IAP repeat-containing 6 /DEF=Mus musculus, clone IMAGE:5365035, mRNA.	39.25	183.75	0.00286706	4.68153	BC026990
1456120_at	gb:BB427489 /DB_XREF=gi:16423817 /DB_XREF=BB427489 /CLONE=C630011I23 /FEA=EST /CNT=23 /TID=Mm.183116.2 /TIER=Stack /STK=15 /UG=Mm.183116 /LL=66961 /UG_GENE=2310043N10Rik /UG_TITLE=RIKEN cDNA 2310043N10 gene	320.95	1498.8	0.000177497	4.66989	Secisbp2l
1439434_x_at	gb:BB317673 /DB_XREF=gi:9024708 /DB_XREF=BB317673 /CLONE=B230370M08 /FEA=EST /CNT=8 /TID=Mm.131994.1 /TIER=Stack /STK=8 /UG=Mm.131994 /UG_TITLE=ESTs	124.1	571.25	0.00182065	4.60314	BB317673
1436875_at	gb:BB130476 /DB_XREF=gi:15408352 /DB_XREF=BB130476 /CLONE=9630045G20 /FEA=EST /CNT=50 /TID=Mm.121735.1 /TIER=Stack /STK=40 /UG=Mm.121735 /UG_TITLE=ESTs, Moderately similar to dynamin 2 (Mus musculus) (M.musculus)	469.55	2156.55	0.000111038	4.5928	Dnm3
1456112_at	gb:AW554765 /DB_XREF=gi:7200188 /DB_XREF=L0245B10-3 /CLONE=L0245B10 /FEA=EST /CNT=76 /TID=Mm.28546.3 /TIER=Stack /STK=15 /UG=Mm.28546 /UG_TITLE=Mus musculus, Similar to hypothetical protein FLJ20505, clone MGC:7150 IMAGE:3256634, mRNA, complete cds	530.05	2431.45	0.00248305	4.58721	Tpr
1435521_at	gb:BQ174527 /DB_XREF=gi:20350018 /DB_XREF=UI-M-DJ2-bvy-k-08-0-UI.s1 /CLONE=UI-M-DJ2-bvy-k-08-0-UI /FEA=EST /CNT=101 /TID=Mm.35930.1 /TIER=Stack /STK=60 /UG=Mm.35930 /LL=103787 /UG_GENE=AI563628 /UG_TITLE=expressed sequence AI563628	156.7	716.3	0.00285911	4.57116	Msi2
1425597_a_at	gb:AW060288 /DB_XREF=gi:6008004 /DB_XREF=UI-M-BH1-amv-b-05-0-UI.s1 /CLONE=UI-M-BH1-amv-b-05-0-UI /FEA=FLmRNA /CNT=22 /TID=Mm.2655.3 /TIER=Stack /STK=10 /UG=Mm.2655 /LL=19317 /UG_GENE=qk /UG_TITLE=quaking /FL=gb:U44940.1	281.05	1283.7	0.0036066	4.56751	Qk
1423594_a_at	gb:BB451714 /DB_XREF=gi:9312749 /DB_XREF=BB451714 /CLONE=D130012G17 /FEA=FLmRNA /CNT=67 /TID=Mm.2377.1 /TIER=Stack /STK=9 /UG=Mm.2377 /LL=13618 /UG_GENE=Ednrb /UG_TITLE=endothelin receptor type B /FL=gb:U32329.1 gb:NM_007904.1	122.5	559.2	0.000731096	4.5649	Ednrb
1439605_at	gb:BB464198 /DB_XREF=gi:16426978 /DB_XREF=BB464198 /CLONE=D130086J20 /FEA=EST /CNT=8 /TID=Mm.101451.1 /TIER=ConsEnd /STK=7 /UG=Mm.101451 /UG_TITLE=ESTs	87.95	401.1	0.000972509	4.56055	BB464198
1424504_at	gb:BE533418 /DB_XREF=gi:9762063 /DB_XREF=601231725F1 /CLONE=IMAGE:3595302 /FEA=FLmRNA /CNT=125 /TID=Mm.87650.1 /TIER=ConsEnd /STK=0 /UG=Mm.87650 /LL=67423 /UG_GENE=3732413A17Rik /UG_TITLE=RIKEN cDNA 3732413A17 gene /FL=gb:BC006596.1	100.6	450.9	0.00424191	4.48211	Rab22a
1436343_at	gb:BM502696 /DB_XREF=gi:18663912 /DB_XREF=ii41d11.x1 /CLONE=IMAGE:5944364 /FEA=EST /CNT=36 /TID=Mm.183257.3 /TIER=Stack /STK=9 /UG=Mm.183257 /UG_TITLE=Mus musculus, clone IMAGE:3492938, mRNA, partial cds	118.9	532.65	0.00379542	4.47982	Chd4
1418431_at	gb:BI328541 /DB_XREF=gi:15013198 /DB_XREF=602985332F1 /CLONE=IMAGE:5138167 /FEA=FLmRNA /CNT=397 /TID=Mm.3380.1 /TIER=Stack /STK=11 /UG=Mm.3380 /LL=16573 /UG_GENE=Kif5b /UG_TITLE=kinesin family member 5B /FL=gb:NM_008448.1 gb:U86090.1	441.05	1974.55	0.000201721	4.47693	Kif5b
1420402_at	gb:NM_009723.1 /DB_XREF=gi:6753139 /GEN=Atp2b2 /FEA=FLmRNA /CNT=26 /TID=Mm.20441.1 /TIER=FL /STK=5 /UG=Mm.20441 /LL=11941 /DEF=Mus musculus ATPase, Ca++ transporting, plasma membrane 2 (Atp2b2), mRNA. /PROD=ATPase, Ca++ transporting, plasma membrane 2 /FL=gb:AF053471.1 gb:NM_009723.1 gb:AB030738.1 gb:AB030737.1	517.8	2312.9	0.000812663	4.46678	Atp2b2
1425075_at	gb:AF411837.1 /DB_XREF=gi:17432553 /FEA=FLmRNA /CNT=21 /TID=Mm.103389.1 /TIER=FL /STK=7 /UG=Mm.103389 /DEF=Mus musculus transcription repressor p66 mRNA, complete cds. /PROD=transcription repressor p66 /FL=gb:AF411837.1	573.8	2514.35	0.00146855	4.38193	Gatad2b
1428045_a_at	gb:BC027739.1 /DB_XREF=gi:20381200 /FEA=mRNA /CNT=2 /TID=Mm.46503.4 /TIER=ConsEnd /STK=0 /UG=Mm.46503 /LL=69257 /UG_GENE=2610036A20Rik /UG_TITLE=RIKEN cDNA 2610036A20 gene /DEF=Mus musculus, Similar to RIKEN cDNA 2610036A20 gene, clone IMAGE:5009479, mRNA.	89.15	390.05	0.00178722	4.37521	Elf2
1419038_a_at	gb:BB283759 /DB_XREF=gi:8984208 /DB_XREF=BB283759 /CLONE=A930103E12 /FEA=FLmRNA /CNT=162 /TID=Mm.23692.1 /TIER=Stack /STK=8 /UG=Mm.23692 /LL=12999 /UG_GENE=Csnk2a1-rs4 /UG_TITLE=casein kinase II, alpha 1 related sequence 4 /FL=gb:NM_007788.1 gb:U51866.1 gb:BC026149.1	870.4	3762.2	0.000635365	4.32238	Csnk2a1
1421850_at	gb:NM_008634.1 /DB_XREF=gi:6678945 /GEN=Mtap1b /FEA=FLmRNA /CNT=150 /TID=Mm.4323.1 /TIER=FL /STK=1 /UG=Mm.4323 /LL=17755 /DEF=Mus musculus microtubule-associated protein 1 B (Mtap1b), mRNA. /PROD=microtubule-associated protein 1 B /FL=gb:NM_008634.1	41.1	176.25	0.00955191	4.28832	Map1b
1440227_at	gb:AV245536 /DB_XREF=gi:16387019 /DB_XREF=AV245536 /CLONE=4831440M03 /FEA=EST /CNT=12 /TID=Mm.30730.1 /TIER=ConsEnd /STK=5 /UG=Mm.30730 /UG_TITLE=ESTs	164.1	702.65	0.00050236	4.28184	Slc5a3
1421225_a_at	gb:NM_018760.1 /DB_XREF=gi:9055345 /GEN=Slc4a4 /FEA=FLmRNA /CNT=11 /TID=Mm.34747.1 /TIER=FL /STK=2 /UG=Mm.34747 /LL=54403 /DEF=Mus musculus solute carrier family 4 (anion exchanger), member 4 (Slc4a4), mRNA. /PROD=solute carrier family 4 (anion exchanger),member 4 /FL=gb:NM_018760.1 gb:AF020195.1	126.45	541.1	0.00609175	4.27916	Slc4a4
1451569_at	gb:AU066920 /DB_XREF=gi:4967657 /DB_XREF=AU066920 /CLONE=MNCb-2722 /FEA=FLmRNA /CNT=73 /TID=Mm.3535.1 /TIER=Stack /STK=30 /UG=Mm.3535 /LL=22026 /UG_GENE=Nr2c2 /UG_TITLE=nuclear receptor subfamily 2, group C, member 2 /FL=gb:U11688.1	329.95	1404.2	0.000186383	4.2558	Nr2c2
1439566_at	gb:BB245373 /DB_XREF=gi:8938119 /DB_XREF=BB245373 /CLONE=A730008P19 /FEA=EST /CNT=11 /TID=Mm.138080.1 /TIER=ConsEnd /STK=7 /UG=Mm.138080 /UG_TITLE=ESTs	121.4	515.6	0.000220071	4.24712	BB245373
1426777_a_at	gb:BF466143 /DB_XREF=gi:11535326 /DB_XREF=UI-M-CG0p-bqu-a-07-0-UI.s1 /CLONE=UI-M-CG0p-bqu-a-07-0-UI /FEA=mRNA /CNT=165 /TID=Mm.1574.1 /TIER=Stack /STK=30 /UG=Mm.1574 /LL=73178 /UG_GENE=Wasl /UG_TITLE=Wiskott-Aldrich syndrome-like (human)	726.2	3073.65	0.000163624	4.23251	Wasl
1437167_at	gb:BB334744 /DB_XREF=gi:16404073 /DB_XREF=BB334744 /CLONE=B830027E03 /FEA=EST /CNT=24 /TID=Mm.74512.1 /TIER=Stack /STK=24 /UG=Mm.74512 /UG_TITLE=ESTs	136.65	565.95	0.000919959	4.1416	Tmod2
1427456_at	gb:BF150771 /DB_XREF=gi:11032166 /DB_XREF=uy88c04.y1 /CLONE=IMAGE:3666630 /FEA=mRNA /CNT=21 /TID=Mm.103485.1 /TIER=ConsEnd /STK=0 /UG=Mm.103485 /LL=14597 /UG_GENE=Ggtb3 /UG_TITLE=galactosyltransferase 3 beta 1, 4	475.1	1950.25	0.00221431	4.10493	Wdfy3
1427366_at	gb:AV023513 /DB_XREF=gi:4800505 /DB_XREF=AV023513 /CLONE=1190032M19 /FEA=mRNA /CNT=22 /TID=Mm.158281.1 /TIER=ConsEnd /STK=4 /UG=Mm.158281 /LL=69473 /UG_GENE=2310003K17Rik /UG_TITLE=RIKEN cDNA 2310003K17 gene	24.7	101.25	0.00489783	4.09919	Krtap3-1
1440161_at	gb:BB378819 /DB_XREF=gi:9091698 /DB_XREF=BB378819 /CLONE=C130095O16 /FEA=EST /CNT=6 /TID=Mm.132463.1 /TIER=ConsEnd /STK=6 /UG=Mm.132463 /UG_TITLE=ESTs	109.1	445.9	0.00529644	4.08708	BB378819
1458385_at	gb:AI461691 /DB_XREF=gi:4315721 /DB_XREF=vw57c08.x1 /CLONE=IMAGE:1247918 /FEA=EST /CNT=14 /TID=Mm.25657.1 /TIER=ConsEnd /STK=2 /UG=Mm.25657 /LL=99647 /UG_GENE=AI461691 /UG_TITLE=expressed sequence AI461691	295.85	1187.8	1.9875e-05	4.01487	Hspa4l
1426432_a_at	gb:AI315030 /DB_XREF=gi:4030297 /DB_XREF=uj28e10.x1 /CLONE=IMAGE:1921290 /FEA=FLmRNA /CNT=142 /TID=Mm.34747.2 /TIER=Stack /STK=21 /UG=Mm.34747 /LL=54403 /UG_GENE=Slc4a4 /UG_TITLE=solute carrier family 4 (anion exchanger), member 4 /FL=gb:AF141934.3	498.85	2002.25	0.000594553	4.01373	Slc4a4
1421504_at	gb:NM_009239.1 /DB_XREF=gi:6678074 /GEN=Sp4 /FEA=FLmRNA /CNT=7 /TID=Mm.5073.1 /TIER=FL /STK=2 /UG=Mm.5073 /LL=20688 /DEF=Mus musculus trans-acting transcription factor 4 (Sp4), mRNA. /PROD=trans-acting transcription factor 4 /FL=gb:U62522.1 gb:NM_009239.1	107.75	432.25	0.00117129	4.0116	Sp4
1450397_at	gb:BB731480 /DB_XREF=gi:16114755 /DB_XREF=BB731480 /CLONE=E970008M12 /FEA=FLmRNA /CNT=150 /TID=Mm.4323.1 /TIER=Stack /STK=28 /UG=Mm.4323 /LL=17755 /UG_GENE=Mtap1b /UG_TITLE=microtubule-associated protein 1 B /FL=gb:NM_008634.1	912.85	3645.35	0.00147028	3.99337	Map1b
1430286_s_at	gb:AK013448.1 /DB_XREF=gi:12850809 /FEA=mRNA /CNT=4 /TID=Mm.45223.1 /TIER=ConsEnd /STK=3 /UG=Mm.45223 /LL=72819 /UG_GENE=2810487F15Rik /UG_TITLE=RIKEN cDNA 2810487F15 gene /DEF=Mus musculus 10, 11 days embryo whole body cDNA, RIKEN full-length enriched library, clone:2810487F15:homolog to SEROLOGICALLY DEFINED BREAST CANCER ANTIGEN NY-BR-81 (FRAGMENT), full insert sequence.	153.5	608.25	0.00229937	3.96254	Gm14057
1456656_at	gb:AI848705 /DB_XREF=gi:5492611 /DB_XREF=UI-M-AH1-agv-h-06-0-UI.s1 /CLONE=UI-M-AH1-agv-h-06-0-UI /FEA=EST /CNT=10 /TID=Mm.40698.1 /TIER=Stack /STK=8 /UG=Mm.40698 /LL=103301 /UG_GENE=AI848705 /UG_TITLE=expressed sequence AI848705	208.85	827.5	0.00142471	3.96217	Veli1
1416661_at	gb:BB835796 /DB_XREF=gi:17014039 /DB_XREF=BB835796 /CLONE=G930038N11 /FEA=FLmRNA /CNT=376 /TID=Mm.2238.1 /TIER=Stack /STK=11 /UG=Mm.2238 /LL=13669 /UG_GENE=Eif3 /UG_TITLE=eukaryotic translation initiation factor 3 /FL=gb:U14172.1 gb:NM_010123.1	66.05	260.75	0.0015901	3.94777	Eif3a
1421545_a_at	gb:NM_022027.1 /DB_XREF=gi:19526754 /GEN=Syne1-pending /FEA=FLmRNA /CNT=4 /TID=Mm.157716.1 /TIER=FL /STK=2 /UG=Mm.157716 /LL=64009 /DEF=Mus musculus synaptic nuclear envelope 1 (Syne1-pending), mRNA. /PROD=synaptic nuclear envelope 1 /FL=gb:AF281869.1 gb:NM_022027.1	108.05	423.85	0.00298413	3.92272	Syne1
1422206_at	gb:BB622039 /DB_XREF=gi:16461224 /DB_XREF=BB622039 /CLONE=6330442P21 /FEA=FLmRNA /CNT=3 /TID=Mm.57041.1 /TIER=ConsEnd /STK=0 /UG=Mm.57041 /LL=26877 /UG_GENE=B3galt1 /UG_TITLE=UDP-Gal:betaGlcNAc beta 1,3-galactosyltransferase, polypeptide 1 /FL=gb:NM_020283.1	85.85	336.35	0.00945589	3.91788	B3galt1
1438236_at	gb:BB485864 /DB_XREF=gi:16441317 /DB_XREF=BB485864 /CLONE=D430033M04 /FEA=EST /CNT=22 /TID=Mm.31274.2 /TIER=Stack /STK=11 /UG=Mm.31274 /UG_TITLE=ESTs	183.15	716.7	0.00124317	3.91319	Nfia
1449859_at	gb:NM_025872.1 /DB_XREF=gi:13385353 /GEN=2310061A22Rik /FEA=FLmRNA /CNT=20 /TID=Mm.3676.1 /TIER=FL /STK=5 /UG=Mm.3676 /LL=66964 /DEF=Mus musculus RIKEN cDNA 2310061A22 gene (2310061A22Rik), mRNA. /PROD=RIKEN cDNA 2310061A22 /FL=gb:NM_025872.1	36.85	143.3	0.00618258	3.88874	Golt1b
1455151_at	gb:C79026 /DB_XREF=gi:2519356 /DB_XREF=C79026 /CLONE=J0059C09 /FEA=EST /CNT=23 /TID=Mm.46044.1 /TIER=Stack /STK=23 /UG=Mm.46044 /LL=97235 /UG_GENE=C79026 /UG_TITLE=expressed sequence C79026	109.5	425.8	0.00821738	3.88858	Akap9
1436535_at	gb:BQ176653 /DB_XREF=gi:20352145 /DB_XREF=UI-M-DJ2-bvz-e-18-0-UI.s1 /CLONE=UI-M-DJ2-bvz-e-18-0-UI /FEA=EST /CNT=58 /TID=Mm.40370.1 /TIER=Stack /STK=10 /UG=Mm.40370 /LL=69056 /UG_GENE=1810007I17Rik /UG_TITLE=RIKEN cDNA 1810007I17 gene	350.6	1357.05	0.000170129	3.87065	Trove2
1449876_at	gb:NM_011160.1 /DB_XREF=gi:6755155 /GEN=Prkg1 /FEA=FLmRNA /CNT=10 /TID=Mm.45826.1 /TIER=FL /STK=5 /UG=Mm.45826 /LL=19091 /DEF=Mus musculus protein kinase, cGMP-dependent, type I (Prkg1), mRNA. /PROD=protein kinase, cGMP-dependent, type I /FL=gb:AF084547.1 gb:NM_011160.1	99.55	385	0.00132848	3.8674	Prkg1b
1447723_at	gb:BE955100 /DB_XREF=gi:10598298 /DB_XREF=UI-M-BH4-bbe-a-04-0-UI.s1 /CLONE=UI-M-BH4-bbe-a-04-0-UI /FEA=EST /CNT=2 /TID=Mm.150904.1 /TIER=ConsEnd /STK=2 /UG=Mm.150904 /UG_TITLE=ESTs	214.9	830.9	0.0022996	3.86645	UI-M-BH4-bbe-a-04-0-UI.s1
1456102_a_at	gb:BB257147 /DB_XREF=gi:8949980 /DB_XREF=BB257147 /CLONE=A730077B04 /FEA=EST /CNT=17 /TID=Mm.46579.3 /TIER=Stack /STK=16 /UG=Mm.46579 /LL=75717 /UG_GENE=4921514I20Rik /UG_TITLE=RIKEN cDNA 4921514I20 gene	233.65	895.25	0.00427137	3.83159	BB257147
1445713_at	gb:BM932430 /DB_XREF=gi:19391582 /DB_XREF=UI-M-BH2.1-aoz-g-10-0-UI.r1 /CLONE=UI-M-BH2.1-aoz-g-10-0-UI /FEA=EST /CNT=3 /TID=Mm.153440.1 /TIER=ConsEnd /STK=2 /UG=Mm.153440 /UG_TITLE=ESTs	101.2	387.3	0.00506051	3.82708	UI-M-BH2.1-aoz-g-10-0-UI.r1
1428376_at	gb:AK015136.1 /DB_XREF=gi:12853358 /FEA=mRNA /CNT=78 /TID=Mm.116284.1 /TIER=Stack /STK=19 /UG=Mm.116284 /LL=67723 /UG_GENE=4932415G12Rik /UG_TITLE=RIKEN cDNA 4932415G12 gene /DEF=Mus musculus adult male testis cDNA, RIKEN full-length enriched library, clone:4930414F20:unclassifiable, full insert sequence.	180.15	689.4	0.00896508	3.82681	4932415G12Rik
1422553_at	gb:NM_008960.1 /DB_XREF=gi:6679522 /GEN=Pten /FEA=FLmRNA /CNT=146 /TID=Mm.1591.1 /TIER=FL+Stack /STK=37 /UG=Mm.1591 /LL=19211 /DEF=Mus musculus phosphatase and tensin homolog (Pten), mRNA. /PROD=phosphatase and tensin homolog /FL=gb:BC021445.1 gb:NM_008960.1 gb:U92437.1	1013.2	3845.15	0.000122921	3.79506	Pten
1437403_at	gb:BB308071 /DB_XREF=gi:15411378 /DB_XREF=BB308071 /CLONE=B230218A19 /FEA=EST /CNT=29 /TID=Mm.101115.1 /TIER=Stack /STK=18 /UG=Mm.101115 /UG_TITLE=ESTs, Moderately similar to MAPB MOUSE MICROTUBULE-ASSOCIATED PROTEIN 1B (M.musculus)	149.9	563.65	0.00383366	3.76017	Samd5
1459014_at	gb:BE956864 /DB_XREF=gi:10601835 /DB_XREF=UI-M-BG2-bbp-b-09-0-UI.s1 /CLONE=UI-M-BG2-bbp-b-09-0-UI /FEA=EST /CNT=3 /TID=Mm.151017.1 /TIER=ConsEnd /STK=2 /UG=Mm.151017 /UG_TITLE=ESTs	41.3	154.7	0.00241796	3.74576	Slc1a2
1425263_a_at	gb:L07508.1 /DB_XREF=gi:193586 /GEN=Golli-mbp /FEA=FLmRNA /CNT=60 /TID=Mm.2992.4 /TIER=FL /STK=3 /UG=Mm.2992 /LL=17196 /UG_TITLE=myelin basic protein /DEF=Mouse Golli-mpb mRNA, complete cds (alternate transcript from clone BG21). /FL=gb:L07508.1	176.85	660.55	0.00442227	3.73509	Mbp
1449961_at	gb:NM_011286.1 /DB_XREF=gi:16945961 /GEN=Rph3a /FEA=FLmRNA /CNT=11 /TID=Mm.181166.1 /TIER=FL /STK=3 /UG=Mm.181166 /LL=19894 /DEF=Mus musculus rabphilin 3A (Rph3a), mRNA. /PROD=rabphilin 3A /FL=gb:D29965.1 gb:NM_011286.1	407.3	1520.3	0.000154024	3.73263	Rph3a
1431024_a_at	gb:AK020165.1 /DB_XREF=gi:12860667 /FEA=mRNA /CNT=24 /TID=Mm.41138.2 /TIER=ConsEnd /STK=0 /UG=Mm.41138 /LL=70738 /UG_GENE=6330417L24Rik /UG_TITLE=RIKEN cDNA 6330417L24 gene /DEF=Mus musculus 12 days embryo male wolffian duct includes surrounding region cDNA, RIKEN full-length enriched library, clone:6720480E17:homolog to RETINOBLASTOMA-BINDING PROTEIN 1-RELATED PROTEIN, full insert sequence.	30.85	114.7	0.00427959	3.71799	Rbp1l1
1441988_at	gb:AI482429 /DB_XREF=gi:4375655 /DB_XREF=vg74b11.x1 /CLONE=IMAGE:871677 /FEA=EST /CNT=17 /TID=Mm.216238.1 /TIER=ConsEnd /STK=3 /UG=Mm.216238 /UG_TITLE=ESTs	373.8	1389.1	0.00803423	3.71616	Ppm1k
1438039_at	gb:BE630599 /DB_XREF=gi:9913287 /DB_XREF=uu38b09.x1 /CLONE=IMAGE:3374201 /FEA=EST /CNT=21 /TID=Mm.36670.1 /TIER=Stack /STK=12 /UG=Mm.36670 /LL=104890 /UG_GENE=AI844876 /UG_TITLE=expressed sequence AI844876	546.3	2026.35	0.000113023	3.70923	Hectd1
1424658_at	gb:BB151477 /DB_XREF=gi:15408950 /DB_XREF=BB151477 /CLONE=A030013J16 /FEA=FLmRNA /CNT=43 /TID=Mm.24585.1 /TIER=ConsEnd /STK=2 /UG=Mm.24585 /UG_TITLE=Mus musculus, clone MGC:29021 IMAGE:3495957, mRNA, complete cds /FL=gb:BC016522.1	82.15	304.4	0.000225396	3.70542	Taok1
1449270_at	gb:BB559706 /DB_XREF=gi:9646072 /DB_XREF=BB559706 /CLONE=E330040D03 /FEA=FLmRNA /CNT=64 /TID=Mm.83454.1 /TIER=ConsEnd /STK=2 /UG=Mm.83454 /LL=67448 /UG_GENE=1200007L24Rik /UG_TITLE=RIKEN cDNA 1200007L24 gene /FL=gb:NM_026162.1 gb:AF378761.1	135.3	501.1	0.000254973	3.70362	Plxdc2
1439122_at	gb:BF226295 /DB_XREF=gi:11134010 /DB_XREF=uz49f10.x1 /CLONE=IMAGE:3672427 /FEA=EST /CNT=12 /TID=Mm.157743.2 /TIER=Stack /STK=8 /UG=Mm.157743 /LL=13209 /UG_GENE=Ddx6 /UG_TITLE=DEAD (aspartate-glutamate-alanine-aspartate) box polypeptide 6	497.85	1843.2	0.00639208	3.70232	Ddx6
1456911_at	gb:BB831639 /DB_XREF=gi:17009882 /DB_XREF=BB831639 /CLONE=G930018E16 /FEA=EST /CNT=8 /TID=Mm.214961.1 /TIER=ConsEnd /STK=6 /UG=Mm.214961 /UG_TITLE=ESTs, Weakly similar to T00386 hypothetical protein KIAA0627 (H.sapiens)	66.7	245.95	0.00635989	3.68741	Clasp2
1419280_at	gb:NM_008845.1 /DB_XREF=gi:6679324 /GEN=Pip5k2a /FEA=FLmRNA /CNT=88 /TID=Mm.8771.1 /TIER=FL /STK=2 /UG=Mm.8771 /LL=18718 /DEF=Mus musculus phosphatidylinositol-4-phosphate 5-kinase, type II, alpha (Pip5k2a), mRNA. /PROD=phosphatidylinositol-4-phosphate 5-kinase, typeII, alpha /FL=gb:NM_008845.1 gb:AB009615.1 gb:BC011097.1	396.9	1463.45	0.000273164	3.6872	Pip5k2a
1442027_at	gb:BB223743 /DB_XREF=gi:16353817 /DB_XREF=BB223743 /CLONE=A530083I02 /FEA=EST /CNT=10 /TID=Mm.77731.1 /TIER=ConsEnd /STK=3 /UG=Mm.77731 /UG_TITLE=ESTs, Weakly similar to FAN MOUSE PROTEIN FAN (M.musculus)	166.05	611.3	0.0022551	3.68142	Nbeal1
1423674_at	gb:BQ033290 /DB_XREF=gi:19768569 /DB_XREF=UI-1-CF0-axf-g-10-0-UI.s1 /CLONE=UI-1-CF0-axf-g-10-0-UI /FEA=FLmRNA /CNT=264 /TID=Mm.27496.1 /TIER=Stack /STK=15 /UG=Mm.27496 /UG_TITLE=Mus musculus, Similar to ubiquitin specific protease 1, clone MGC:25528 IMAGE:3585191, mRNA, complete cds /FL=gb:BC018179.1 gb:BC020007.1	172.85	633.4	0.00125183	3.66445	Usp1
1431225_at	gb:BB656631 /DB_XREF=gi:16490459 /DB_XREF=BB656631 /CLONE=D130046O10 /FEA=mRNA /CNT=7 /TID=Mm.41702.2 /TIER=ConsEnd /STK=0 /UG=Mm.41702 /LL=67779 /UG_GENE=6230403H02Rik /UG_TITLE=RIKEN cDNA 6230403H02 gene	193.6	704.45	0.000230911	3.63869	Sox11
1441955_s_at	gb:BB381990 /DB_XREF=gi:9101721 /DB_XREF=BB381990 /CLONE=C230016N15 /FEA=EST /CNT=4 /TID=Mm.132584.1 /TIER=ConsEnd /STK=4 /UG=Mm.132584 /UG_TITLE=ESTs, Moderately similar to AF128835 1 polyA binding protein-interacting protein PAIP1 (M.musculus)	32.65	118.25	0.00864352	3.62175	Paip1
1457744_at	gb:BG243238 /DB_XREF=gi:12753053 /DB_XREF=602355656F1 /CLONE=IMAGE:4484196 /FEA=EST /CNT=6 /TID=Mm.212498.1 /TIER=ConsEnd /STK=3 /UG=Mm.212498 /UG_TITLE=ESTs, Moderately similar to A57514 RNA helicase HEL117 - rat (R.norvegicus)	57.2	205.95	0.000517184	3.60052	Ddx46
1428974_s_at	gb:BB161653 /DB_XREF=gi:8817593 /DB_XREF=BB161653 /CLONE=A130061I02 /FEA=mRNA /CNT=64 /TID=Mm.220913.1 /TIER=Stack /STK=20 /UG=Mm.220913 /LL=74510 /UG_GENE=5530402H04Rik /UG_TITLE=RIKEN cDNA 5530402H04 gene	132.75	477.85	0.00311734	3.59962	Lztfl1
1438565_at	gb:BB464727 /DB_XREF=gi:16427018 /DB_XREF=BB464727 /CLONE=D130094D22 /FEA=EST /CNT=19 /TID=Mm.103400.2 /TIER=Stack /STK=10 /UG=Mm.103400 /LL=100753 /UG_GENE=AI849226 /UG_TITLE=expressed sequence AI849226	179.95	647.25	0.00777883	3.59683	A830010M20Rik
1423875_at	gb:BC023048.1 /DB_XREF=gi:18605922 /FEA=FLmRNA /CNT=147 /TID=Mm.218526.1 /TIER=FL+Stack /STK=86 /UG=Mm.218526 /DEF=Mus musculus, Similar to KIAA1600 protein, clone MGC:38831 IMAGE:5360554, mRNA, complete cds. /PROD=Similar to KIAA1600 protein /FL=gb:BC023048.1	106.9	384.3	0.00310772	3.59495	Fam160b1
1422748_at	gb:NM_015753.1 /DB_XREF=gi:7657694 /GEN=Zfhx1b /FEA=FLmRNA /CNT=37 /TID=Mm.37676.1 /TIER=FL+Stack /STK=15 /UG=Mm.37676 /LL=24136 /DEF=Mus musculus zinc finger homeobox 1b (Zfhx1b), mRNA. /PROD=zinc finger homeobox 1b /FL=gb:NM_015753.1 gb:AF033116.1	1514.15	5427.6	0.00197624	3.58459	Zfhx1b
1422834_at	gb:NM_019697.1 /DB_XREF=gi:9790092 /GEN=Kcnd2 /FEA=FLmRNA /CNT=51 /TID=Mm.132309.1 /TIER=FL+Stack /STK=10 /UG=Mm.132309 /LL=16508 /DEF=Mus musculus potassium voltage-gated channel, Shal-related family, member 2 (Kcnd2), mRNA. /PROD=potassium voltage-gated channel, Shal-relatedfamily, member 2 /FL=gb:AF107780.1 gb:NM_019697.1	584.95	2094.85	6.22308e-06	3.58125	Kcnd2
1432705_at	gb:BB025511 /DB_XREF=gi:8200417 /DB_XREF=BB025511 /CLONE=5330428N10 /FEA=mRNA /CNT=2 /TID=Mm.110449.1 /TIER=ConsEnd /STK=1 /UG=Mm.110449 /LL=78277 /UG_GENE=5330428N10Rik /UG_TITLE=RIKEN cDNA 5330428N10 gene	28.05	100.25	0.00508768	3.57398	BB025511
1426326_at	gb:U05343.1 /DB_XREF=gi:453375 /GEN=Pzf /FEA=FLmRNA /CNT=27 /TID=Mm.140246.1 /TIER=FL /STK=0 /UG=Mm.140246 /LL=109910 /DEF=Mus musculus Balbc zinc finger protein PZF (Pzf) mRNA, complete cds. /PROD=zinc finger protein PZF /FL=gb:U05343.1	227.8	809.8	0.00153991	3.55487	Pzf
1418245_a_at	gb:AF229055.1 /DB_XREF=gi:18461362 /GEN=Hrnbp2 /FEA=FLmRNA /CNT=67 /TID=Mm.25496.1 /TIER=FL+Stack /STK=27 /UG=Mm.25496 /LL=93686 /DEF=Mus musculus hexaribonucleotide binding protein 2 (Hrnbp2) mRNA, complete cds. /PROD=hexaribonucleotide binding protein 2 /FL=gb:NM_053104.1 gb:AF387322.1 gb:AF229055.1	709.95	2489.1	0.000991573	3.50602	Hrnbp2
1452360_a_at	gb:BB376407 /DB_XREF=gi:16407508 /DB_XREF=BB376407 /CLONE=C130085A19 /FEA=mRNA /CNT=49 /TID=Mm.95879.2 /TIER=Stack /STK=35 /UG=Mm.95879 /UG_TITLE=Mus musculus, clone IMAGE:4036309, mRNA	133.5	465	0.00420377	3.48315	Rbbp2
1441396_at	gb:AV328619 /DB_XREF=gi:16395920 /DB_XREF=AV328619 /CLONE=6330442P21 /FEA=EST /CNT=4 /TID=Mm.118323.1 /TIER=ConsEnd /STK=4 /UG=Mm.118323 /UG_TITLE=ESTs	338.1	1176.3	0.00540961	3.47915	B3galt1
1422048_at	gb:AF029983.1 /DB_XREF=gi:3046908 /FEA=FLmRNA /CNT=14 /TID=Mm.10688.1 /TIER=FL /STK=1 /UG=Mm.10688 /LL=22067 /UG_GENE=Trrp5 /DEF=Mus musculus transient receptor potential protein 5 mRNA, complete cds. /PROD=transient receptor potential protein 5 /FL=gb:AF029983.1 gb:AF060107.1 gb:NM_009428.1	191.7	666.5	0.00290553	3.47679	Trrp5
1437160_at	gb:BB702951 /DB_XREF=gi:16051775 /DB_XREF=BB702951 /CLONE=7420446I11 /FEA=EST /CNT=26 /TID=Mm.126932.1 /TIER=Stack /STK=24 /UG=Mm.126932 /UG_TITLE=ESTs	534.05	1855.65	0.00811674	3.47467	Nlgn1
1427275_at	gb:BI665051 /DB_XREF=gi:15579271 /DB_XREF=603287509F1 /CLONE=IMAGE:5321378 /FEA=mRNA /CNT=93 /TID=Mm.192224.2 /TIER=Stack /STK=15 /UG=Mm.192224 /LL=22695 /UG_GENE=Zfp36 /UG_TITLE=zinc finger protein 36	138.2	476.15	0.00302235	3.44537	Smc4
1424342_at	gb:BC010204.1 /DB_XREF=gi:16307329 /FEA=FLmRNA /CNT=255 /TID=Mm.12831.1 /TIER=FL+Stack /STK=36 /UG=Mm.12831 /LL=70705 /UG_GENE=3830421F13Rik /DEF=Mus musculus, RIKEN cDNA 3830421F13 gene, clone MGC:7144 IMAGE:3158224, mRNA, complete cds. /PROD=RIKEN cDNA 3830421F13 gene /FL=gb:BC010204.1	975.45	3338.8	0.0097524	3.42283	Fyttd1
1460336_at	gb:BB745167 /DB_XREF=gi:16148106 /DB_XREF=BB745167 /CLONE=F530007A20 /FEA=FLmRNA /CNT=43 /TID=Mm.10707.1 /TIER=Stack /STK=16 /UG=Mm.10707 /LL=19017 /UG_GENE=Ppargc1 /UG_TITLE=peroxisome proliferative activated receptor, gamma, coactivator 1 /FL=gb:AF049330.1 gb:NM_008904.1	366.9	1254.6	0.000401382	3.41946	Ppargc1
1441166_at	gb:AW123460 /DB_XREF=gi:6098990 /DB_XREF=UI-M-BH2.1-apj-f-07-0-UI.s1 /CLONE=UI-M-BH2.1-apj-f-07-0-UI /FEA=EST /CNT=5 /TID=Mm.71038.1 /TIER=ConsEnd /STK=4 /UG=Mm.71038 /UG_TITLE=ESTs	150.35	512.2	0.000795631	3.40672	A330050F15Rik
1436311_at	gb:BB824003 /DB_XREF=gi:17002246 /DB_XREF=BB824003 /CLONE=G830030J24 /FEA=EST /CNT=71 /TID=Mm.249.1 /TIER=Stack /STK=14 /UG=Mm.249 /LL=103523 /UG_GENE=AA407055 /UG_TITLE=expressed sequence AA407055	30.7	103.65	0.0080903	3.37622	Gemin5
1419256_at	gb:BM213516 /DB_XREF=gi:17771438 /DB_XREF=C0837E11-3 /CLONE=C0837E11 /FEA=FLmRNA /CNT=171 /TID=Mm.123110.1 /TIER=Stack /STK=75 /UG=Mm.123110 /LL=20742 /UG_GENE=Spnb2 /UG_TITLE=beta-spectrin 2, non-erythrocytic /FL=gb:AF017112.1 gb:NM_009260.1	1485.25	5013.95	0.000156448	3.37583	Sptbn1
1457142_at	gb:BB667731 /DB_XREF=gi:16399180 /DB_XREF=BB667731 /CLONE=C730036B16 /FEA=EST /CNT=10 /TID=Mm.131089.1 /TIER=ConsEnd /STK=5 /UG=Mm.131089 /UG_TITLE=ESTs	65.7	221.5	0.000251171	3.37139	Necab1
1423633_at	gb:BB703486 /DB_XREF=gi:16052321 /DB_XREF=BB703486 /CLONE=7420452J21 /FEA=FLmRNA /CNT=20 /TID=Mm.46620.1 /TIER=Stack /STK=8 /UG=Mm.46620 /LL=67797 /UG_GENE=6530403A03Rik /UG_TITLE=RIKEN cDNA 6530403A03 gene /FL=gb:NM_026382.1	148.9	500.5	0.00445037	3.36132	Snrnp48
1442312_at	gb:BM229258 /DB_XREF=gi:17792126 /DB_XREF=K0275G12-3 /CLONE=K0275G12 /FEA=EST /CNT=5 /TID=Mm.214658.1 /TIER=ConsEnd /STK=3 /UG=Mm.214658 /UG_TITLE=ESTs	106.15	356.5	0.00342504	3.35846	K0275G12-3
1456892_at	gb:BB442855 /DB_XREF=gi:16424839 /DB_XREF=BB442855 /CLONE=D030036P13 /FEA=EST /CNT=11 /TID=Mm.103398.1 /TIER=ConsEnd /STK=6 /UG=Mm.103398 /UG_TITLE=ESTs	95.75	321.55	0.00490672	3.35822	D030036P13Rik
1440801_s_at	gb:BB391602 /DB_XREF=gi:9114556 /DB_XREF=BB391602 /CLONE=C230075D03 /FEA=EST /CNT=5 /TID=Mm.133170.1 /TIER=ConsEnd /STK=5 /UG=Mm.133170 /UG_TITLE=ESTs, Weakly similar to BETA-ADRENERGIC RECEPTOR KINASE 2 (R.norvegicus)	736.8	2470.1	0.00481857	3.35247	BB391602
1456088_at	gb:BF134200 /DB_XREF=gi:10973240 /DB_XREF=601778893F1 /CLONE=IMAGE:4007134 /FEA=EST /CNT=157 /TID=Mm.149115.6 /TIER=Stack /STK=16 /UG=Mm.149115 /LL=11798 /UG_GENE=Birc4 /UG_TITLE=baculoviral IAP repeat-containing 4	188.8	632.4	0.000362079	3.34958	Xiap
1419616_at	gb:NM_007561.1 /DB_XREF=gi:6680803 /GEN=Bmpr2 /FEA=FLmRNA /CNT=33 /TID=Mm.7106.1 /TIER=FL+Stack /STK=8 /UG=Mm.7106 /LL=12168 /DEF=Mus musculus bone morphogenic protein receptor, type II (serinethreonine kinase) (Bmpr2), mRNA. /PROD=bone morphogenic protein receptor, type II(serinethreonine kinase) /FL=gb:U78048.1 gb:AF003942.1 gb:NM_007561.1	77.4	258.4	0.00868434	3.3385	Bmpr2
1449298_a_at	gb:NM_016744.1 /DB_XREF=gi:7949106 /GEN=Pde1a /FEA=FLmRNA /CNT=35 /TID=Mm.40678.1 /TIER=FL+Stack /STK=15 /UG=Mm.40678 /LL=18573 /DEF=Mus musculus phosphodiesterase 1A, calmodulin-dependent (Pde1a), mRNA. /PROD=phosphodiesterase 1A, calmodulin-dependent /FL=gb:U56649.1 gb:NM_016744.1	883.8	2942.95	0.00174572	3.32988	Pde1a
1453363_at	gb:BB303563 /DB_XREF=gi:9004268 /DB_XREF=BB303563 /CLONE=B230105C07 /FEA=mRNA /CNT=25 /TID=Mm.132065.1 /TIER=ConsEnd /STK=4 /UG=Mm.132065 /LL=77978 /UG_GENE=B230105C07Rik /UG_TITLE=RIKEN cDNA B230105C07 gene	56.35	186.3	0.00128271	3.30612	BB303563
1456874_at	gb:BB817332 /DB_XREF=gi:16989961 /DB_XREF=BB817332 /CLONE=G730039C12 /FEA=EST /CNT=15 /TID=Mm.71702.1 /TIER=ConsEnd /STK=6 /UG=Mm.71702 /UG_TITLE=ESTs, Highly similar to fibronectin leucine rich transmembrane protein 2 (Homo sapiens) (H.sapiens)	92.35	303.65	0.00320477	3.28803	Flrt2
1456718_at	gb:BB768133 /DB_XREF=gi:16196853 /DB_XREF=BB768133 /CLONE=G370081N12 /FEA=EST /CNT=8 /TID=Mm.23325.1 /TIER=Stack /STK=8 /UG=Mm.23325 /UG_TITLE=ESTs	39.55	129.55	0.0079854	3.2756	BB768133
1460509_at	gb:AK018190.1 /DB_XREF=gi:12857796 /FEA=mRNA /CNT=2 /TID=Mm.32526.1 /TIER=ConsEnd /STK=0 /UG=Mm.32526 /LL=70755 /UG_GENE=6330417G03Rik /UG_TITLE=RIKEN cDNA 6330417G03 gene /DEF=Mus musculus adult male medulla oblongata cDNA, RIKEN full-length enriched library, clone:6330417G03:homolog to HYPOTHETICAL 8.1 KDA PROTEIN, full insert sequence.	159.6	520.05	0.00639587	3.25846	B3galt1
1450100_a_at	gb:AW046403 /DB_XREF=gi:5906932 /DB_XREF=UI-M-BH1-akp-a-09-0-UI.s1 /CLONE=UI-M-BH1-akp-a-09-0-UI /FEA=FLmRNA /CNT=62 /TID=Mm.67998.1 /TIER=Stack /STK=8 /UG=Mm.67998 /LL=56070 /UG_GENE=Tcerg1 /UG_TITLE=transcription elongation regulator 1 (CA150) /FL=gb:AB023485.1 gb:NM_019512.1	72.8	236.6	0.00195645	3.25	Tcerg1
1455586_at	gb:BB275228 /DB_XREF=gi:8972249 /DB_XREF=BB275228 /CLONE=A830091N08 /FEA=EST /CNT=60 /TID=Mm.217250.1 /TIER=Stack /STK=10 /UG=Mm.217250 /UG_TITLE=ESTs, Moderately similar to S12207 hypothetical protein (M.musculus)	67.75	219.6	0.00297131	3.24133	BB275228
1444058_at	gb:BM231657 /DB_XREF=gi:17866927 /DB_XREF=K0312G04-3 /CLONE=K0312G04 /FEA=EST /CNT=10 /TID=Mm.86668.1 /TIER=ConsEnd /STK=2 /UG=Mm.86668 /UG_TITLE=ESTs, Moderately similar to T00362 hypothetical protein KIAA0675 (H.sapiens)	282	911.8	0.000549035	3.23333	Dzip3
1438403_s_at	gb:BF537798 /DB_XREF=gi:11625166 /DB_XREF=602053404F1 /CLONE=IMAGE:4192561 /FEA=EST /CNT=31 /TID=Mm.218611.2 /TIER=Stack /STK=10 /UG=Mm.218611 /LL=54409 /UG_GENE=Ramp2 /UG_TITLE=receptor (calcitonin) activity modifying protein 2	904.3	2919.65	0.00167419	3.22863	Malat1
1434282_at	gb:BB029886 /DB_XREF=gi:16258141 /DB_XREF=BB029886 /CLONE=5830448N01 /FEA=EST /CNT=108 /TID=Mm.22315.1 /TIER=Stack /STK=12 /UG=Mm.22315 /LL=102394 /UG_GENE=AA409502 /UG_TITLE=expressed sequence AA409502	43	138.75	0.00884204	3.22674	Ibtk
1450434_s_at	gb:NM_009981.1 /DB_XREF=gi:6753551 /GEN=Pcyt1a /FEA=FLmRNA /CNT=16 /TID=Mm.6161.1 /TIER=FL /STK=1 /UG=Mm.6161 /LL=13026 /DEF=Mus musculus phosphate cytidylyltransferase 1, choline, alpha isoform (Pcyt1a), mRNA. /PROD=CTP phosphocholine cytidylyl transferase /FL=gb:NM_009981.1	110.75	354.7	0.00479736	3.20271	Pcyt1a
1436800_at	gb:AV376318 /DB_XREF=gi:16398067 /DB_XREF=AV376318 /CLONE=9130207J01 /FEA=EST /CNT=52 /TID=Mm.66401.1 /TIER=Stack /STK=51 /UG=Mm.66401 /UG_TITLE=ESTs, Weakly similar to FRP MOUSE FOLLISTATIN-RELATED PROTEIN PRECURSOR (M.musculus)	293.8	940.35	0.00094628	3.20065	Fstl5
1437439_at	gb:BM235375 /DB_XREF=gi:17870645 /DB_XREF=K0417D03-3 /CLONE=K0417D03 /FEA=EST /CNT=20 /TID=Mm.169298.1 /TIER=Stack /STK=18 /UG=Mm.169298 /UG_TITLE=ESTs	49.55	158.55	0.00781316	3.1998	2410089E03Rik
1420563_at	gb:NM_016886.1 /DB_XREF=gi:8393312 /GEN=Gria3 /FEA=FLmRNA /CNT=11 /TID=Mm.42021.1 /TIER=FL /STK=4 /UG=Mm.42021 /LL=53623 /DEF=Mus musculus glutamate receptor, ionotropic, AMPA3 (alpha 3) (Gria3), mRNA. /PROD=glutamate receptor, ionotropic, AMPA3 (alpha3) /FL=gb:AF483495.1 gb:AB022342.1 gb:AF483494.1 gb:NM_016886.1	424.4	1352.15	0.00165375	3.18603	Gria3
1433413_at	gb:AK006863.1 /DB_XREF=gi:12840146 /FEA=mRNA /CNT=1 /TID=Mm.39843.1 /TIER=ConsEnd /STK=0 /UG=Mm.39843 /LL=68042 /UG_GENE=1700062G21Rik /UG_TITLE=RIKEN cDNA 1700062G21 gene /DEF=Mus musculus adult male testis cDNA, RIKEN full-length enriched library, clone:1700062G21:hypothetical protein, full insert sequence.	108.2	344.4	0.0048621	3.18299	Gm10308
1429327_at	gb:AK017826.1 /DB_XREF=gi:12857276 /FEA=mRNA /CNT=57 /TID=Mm.46705.1 /TIER=Stack /STK=40 /UG=Mm.46705 /LL=66244 /UG_GENE=1500011I12Rik /UG_TITLE=RIKEN cDNA 1500011I12 gene /DEF=Mus musculus 8 days embryo whole body cDNA, RIKEN full-length enriched library, clone:5730548O15:homolog to HYPOTHETICAL PROTEIN (FRAGMENT), full insert sequence.	136.3	430.55	0.00531419	3.15884	Nemf
1452333_at	gb:BM230202 /DB_XREF=gi:17793371 /DB_XREF=K0291G03-3 /CLONE=K0291G03 /FEA=mRNA /CNT=88 /TID=Mm.12184.2 /TIER=Stack /STK=11 /UG=Mm.12184 /LL=67155 /UG_GENE=2610209L14Rik /UG_TITLE=RIKEN cDNA 2610209L14 gene	358.35	1130.55	0.00533613	3.15488	Smarca2
1436895_at	gb:BB182934 /DB_XREF=gi:15409427 /DB_XREF=BB182934 /CLONE=A230102O17 /FEA=EST /CNT=41 /TID=Mm.132151.1 /TIER=Stack /STK=38 /UG=Mm.132151 /UG_TITLE=ESTs, Weakly similar to KIAA0782 protein (H.sapiens)	290.55	912.6	0.00423122	3.14094	Arap2
1439940_at	gb:AV328280 /DB_XREF=gi:15406324 /DB_XREF=AV328280 /CLONE=6330440N14 /FEA=EST /CNT=7 /TID=Mm.44658.1 /TIER=ConsEnd /STK=6 /UG=Mm.44658 /UG_TITLE=ESTs	2005.15	6287.55	0.00171757	3.1357	Slc1a2
1425581_s_at	gb:AF349573.1 /DB_XREF=gi:13650040 /FEA=FLmRNA /CNT=24 /TID=Mm.221162.1 /TIER=FL /STK=1 /UG=Mm.221162 /LL=108150 /UG_GENE=Galnt7 /DEF=Mus musculus UDP-N-acetyl-alpha-D-galactosamine:polypeptide N-acetylgalactosaminyltransferase 7 mRNA, complete cds. /PROD=UDP-N-acetyl-alpha-D-galactosamine:polypeptideN-acetylgalactosaminyltransferase 7 /FL=gb:AF349573.1	54.7	171.45	0.00494155	3.13437	Galnt7
1425533_a_at	gb:BC025118.1 /DB_XREF=gi:19264082 /FEA=FLmRNA /CNT=45 /TID=Mm.41481.2 /TIER=FL /STK=1 /UG=Mm.41481 /LL=29819 /UG_GENE=Stau2 /DEF=Mus musculus, Similar to staufen, RNA binding protein, homolog 2 (Drosophila), clone MGC:36821 IMAGE:3670067, mRNA, complete cds. /PROD=Similar to staufen, RNA binding protein, homolog2 (Drosophila) /FL=gb:BC025118.1	1341.95	4204.4	0.000419316	3.13305	Stau2
1443143_at	gb:BB039519 /DB_XREF=gi:16258551 /DB_XREF=BB039519 /CLONE=6030443C03 /FEA=EST /CNT=3 /TID=Mm.207172.1 /TIER=ConsEnd /STK=3 /UG=Mm.207172 /UG_TITLE=ESTs	85.45	267.1	0.00199272	3.1258	Flrt1
1449615_s_at	gb:C77256 /DB_XREF=gi:2517586 /DB_XREF=C77256 /CLONE=J0028B03 /FEA=EST /CNT=1 /TID=Mm.215181.1 /TIER=ConsEnd /STK=1 /UG=Mm.215181 /LL=52229 /UG_GENE=D1Ertd101e /UG_TITLE=DNA segment, Chr 1, ERATO Doi 101, expressed	72.25	225.65	0.000139909	3.12318	Hdlbp
1437794_at	gb:BG071186 /DB_XREF=gi:12553755 /DB_XREF=H3095F10-3 /CLONE=H3095F10 /FEA=EST /CNT=15 /TID=Mm.154496.1 /TIER=Stack /STK=14 /UG=Mm.154496 /UG_TITLE=ESTs, Highly similar to T14320 calcineurin inhibitor cain - rat (R.norvegicus)	41.9	130.25	0.00555981	3.10859	Cain
1458129_at	gb:BB559501 /DB_XREF=gi:16449008 /DB_XREF=BB559501 /CLONE=E330039D10 /FEA=EST /CNT=3 /TID=Mm.194694.1 /TIER=ConsEnd /STK=3 /UG=Mm.194694 /UG_TITLE=ESTs	111.1	344.5	0.00385477	3.10081	BB559501
1426360_at	gb:BI107105 /DB_XREF=gi:14557998 /DB_XREF=602894529F1 /CLONE=IMAGE:5039694 /FEA=FLmRNA /CNT=181 /TID=Mm.193073.1 /TIER=Stack /STK=16 /UG=Mm.193073 /UG_TITLE=Mus musculus, Similar to KIAA0663 gene product, clone MGC:6929 IMAGE:2811511, mRNA, complete cds /FL=gb:BC005786.1	108.3	335	0.000709251	3.09326	Zc3h11a
1440901_at	gb:BB279524 /DB_XREF=gi:16401173 /DB_XREF=BB279524 /CLONE=A930018F05 /FEA=EST /CNT=8 /TID=Mm.101340.1 /TIER=ConsEnd /STK=4 /UG=Mm.101340 /UG_TITLE=ESTs, Weakly similar to KDGA MOUSE DIACYLGLYCEROL KINASE, ALPHA (M.musculus)	274.7	849.45	0.000574957	3.09228	Dgkb
1444739_at	gb:BE944190 /DB_XREF=gi:10521949 /DB_XREF=UI-M-BH3-avs-b-10-0-UI.s1 /CLONE=UI-M-BH3-avs-b-10-0-UI /FEA=EST /CNT=4 /TID=Mm.138875.1 /TIER=ConsEnd /STK=2 /UG=Mm.138875 /UG_TITLE=ESTs	53.75	166.15	0.00512019	3.09116	UI-M-BH3-avs-b-10-0-UI.s1
1445824_at	gb:AV276001 /DB_XREF=gi:16390768 /DB_XREF=AV276001 /CLONE=4932432D06 /FEA=EST /CNT=3 /TID=Mm.61078.1 /TIER=ConsEnd /STK=2 /UG=Mm.61078 /UG_TITLE=ESTs, Weakly similar to Zfp73 gene (M.musculus)	89.15	274.45	0.00407313	3.07852	Znf728
1419277_at	gb:NM_130879.1 /DB_XREF=gi:18700015 /GEN=BC021769 /FEA=FLmRNA /CNT=73 /TID=Mm.218478.1 /TIER=FL+Stack /STK=11 /UG=Mm.218478 /LL=170707 /DEF=Mus musculus cDNA sequence BC021769 (BC021769), mRNA. /PROD=cDNA sequence BC021769 /FL=gb:BC021769.1 gb:NM_130879.1	105.75	322.75	0.000846864	3.05201	Usp48
1424350_s_at	gb:BE987427 /DB_XREF=gi:10662771 /DB_XREF=UI-M-CG0p-bgx-h-06-0-UI.s1 /CLONE=UI-M-CG0p-bgx-h-06-0-UI /FEA=FLmRNA /CNT=65 /TID=Mm.205957.1 /TIER=ConsEnd /STK=2 /UG=Mm.205957 /UG_TITLE=Mus musculus, Similar to KIAA0205 gene product, clone MGC:18768 IMAGE:4020003, mRNA, complete cds /FL=gb:BC013667.1	386.75	1176.95	0.00262976	3.04318	Lpgat1
1418024_at	gb:BG067031 /DB_XREF=gi:12549600 /DB_XREF=H3049G08-3 /CLONE=H3049G08 /FEA=FLmRNA /CNT=123 /TID=Mm.28256.1 /TIER=Stack /STK=9 /UG=Mm.28256 /LL=74838 /UG_GENE=Narg1 /UG_TITLE=NMDA receptor-regulated gene 1 /FL=gb:AF237622.1 gb:NM_053089.1	520.1	1580.8	5.44359e-05	3.03942	Narg1
1421508_at	gb:NM_011855.2 /DB_XREF=gi:7657412 /GEN=Odz1 /FEA=FLmRNA /CNT=6 /TID=Mm.42037.1 /TIER=FL /STK=2 /UG=Mm.42037 /LL=23963 /DEF=Mus musculus odd Ozten-m homolog 1 (Drosophila) (Odz1), mRNA. /PROD=odd Ozten-m homolog 1 (Drosophila) /FL=gb:AB025410.1 gb:NM_011855.2	123.95	375.45	0.00597098	3.02904	Odz1
1423995_at	gb:BQ175246 /DB_XREF=gi:20350738 /DB_XREF=UI-M-DJ2-bwc-e-04-0-UI.s1 /CLONE=UI-M-DJ2-bwc-e-04-0-UI /FEA=FLmRNA /CNT=232 /TID=Mm.42027.1 /TIER=Stack /STK=18 /UG=Mm.42027 /LL=16561 /UG_GENE=Kif1b /UG_TITLE=kinesin heavy chain member 1B /FL=gb:AF090190.1 gb:AF131865.1	711.45	2151.45	0.00631207	3.02404	Kif1b
1449042_at	gb:BB836888 /DB_XREF=gi:17015131 /DB_XREF=BB836888 /CLONE=G930043K09 /FEA=FLmRNA /CNT=111 /TID=Mm.493.1 /TIER=Stack /STK=8 /UG=Mm.493 /LL=13018 /UG_GENE=Ctcf /UG_TITLE=CCCTC-binding factor /FL=gb:NM_007794.1 gb:U51037.1	340	1025	0.00266394	3.01471	Ctcf
1423084_at	gb:BB223909 /DB_XREF=gi:16353837 /DB_XREF=BB223909 /CLONE=A530084E06 /FEA=FLmRNA /CNT=84 /TID=Mm.123510.1 /TIER=Stack /STK=59 /UG=Mm.123510 /LL=26878 /UG_GENE=B3galt2 /UG_TITLE=UDP-Gal:betaGlcNAc beta 1,3-galactosyltransferase, polypeptide 2 /FL=gb:NM_020025.1	143	431.05	0.00790212	3.01434	B3galt2
1423559_at	gb:BB750192 /DB_XREF=gi:16154428 /DB_XREF=BB750192 /CLONE=G130002F04 /FEA=FLmRNA /CNT=23 /TID=Mm.1926.1 /TIER=Stack /STK=11 /UG=Mm.1926 /LL=16502 /UG_GENE=Kcnc1 /UG_TITLE=potassium voltage gated channel, Shaw-related subfamily, member 1 /FL=gb:NM_008421.1	696.9	2099.05	0.00213527	3.01198	Kcnc1
1426541_a_at	gb:BF168366 /DB_XREF=gi:11048718 /DB_XREF=601774351F1 /CLONE=IMAGE:3994764 /FEA=FLmRNA /CNT=107 /TID=Mm.41423.1 /TIER=ConsEnd /STK=0 /UG=Mm.41423 /LL=71946 /UG_GENE=2310067E08Rik /UG_TITLE=RIKEN cDNA 2310067E08 gene /FL=gb:BC019813.1	923.5	2752.5	0.00544957	2.98051	Endod1
1427542_at	gb:BC027318.1 /DB_XREF=gi:20071233 /FEA=mRNA /CNT=5 /TID=Mm.153750.1 /TIER=ConsEnd /STK=0 /UG=Mm.153750 /UG_TITLE=Mus musculus, clone IMAGE:3980989, mRNA /DEF=Mus musculus, clone IMAGE:3980989, mRNA.	506.05	1508.25	0.00974653	2.98044	Sobp
1436891_at	gb:AW536567 /DB_XREF=gi:7178984 /DB_XREF=G0106A11-3 /CLONE=G0106A11 /FEA=EST /CNT=61 /TID=Mm.102507.1 /TIER=Stack /STK=38 /UG=Mm.102507 /LL=103202 /UG_GENE=AI327321 /UG_TITLE=expressed sequence AI327321	231.8	689.45	0.000579642	2.97433	Usp15
1420946_at	gb:BM230515 /DB_XREF=gi:17793757 /DB_XREF=K0296F04-3 /CLONE=K0296F04 /FEA=FLmRNA /CNT=165 /TID=Mm.10141.1 /TIER=Stack /STK=20 /UG=Mm.10141 /LL=22589 /UG_GENE=Xnp /UG_TITLE=X-linked nuclear protein /FL=gb:NM_009530.1 gb:AF026032.1	95.95	285	0.000453054	2.9703	Xnp
1437894_at	gb:BE994433 /DB_XREF=gi:10677667 /DB_XREF=UI-M-BZ1-bjn-c-03-0-UI.s1 /CLONE=UI-M-BZ1-bjn-c-03-0-UI /FEA=EST /CNT=20 /TID=Mm.132579.1 /TIER=Stack /STK=13 /UG=Mm.132579 /UG_TITLE=ESTs	150.45	445.15	0.00158657	2.95879	Prox1
1453103_at	gb:AK011936.1 /DB_XREF=gi:12848366 /FEA=mRNA /CNT=86 /TID=Mm.203875.1 /TIER=Stack /STK=50 /UG=Mm.203875 /LL=72478 /UG_GENE=2610209L21Rik /UG_TITLE=RIKEN cDNA 2610209L21 gene /DEF=Mus musculus 10 days embryo whole body cDNA, RIKEN full-length enriched library, clone:2610209L21:unclassifiable transcript, full insert sequence.	190.95	563.85	0.00281539	2.95287	Ablim1
1438798_at	gb:BB764190 /DB_XREF=gi:16192618 /DB_XREF=BB764190 /CLONE=G370033J10 /FEA=EST /CNT=15 /TID=Mm.132709.1 /TIER=Stack /STK=9 /UG=Mm.132709 /UG_TITLE=ESTs, Highly similar to Y355_HUMAN HYPOTHETICAL PROTEIN KIAA0355 (H.sapiens)	66.75	196.45	0.00720498	2.94307	BB764190
1450050_at	gb:AW537496 /DB_XREF=gi:7179913 /DB_XREF=G0117B09-3 /CLONE=G0117B09 /FEA=FLmRNA /CNT=69 /TID=Mm.15694.1 /TIER=Stack /STK=12 /UG=Mm.15694 /LL=15260 /UG_GENE=Hira /UG_TITLE=histone cell cycle regulation defective homolog A (S. cerevisiae) /FL=gb:NM_010435.1	139.6	410.75	0.00707189	2.94234	Hira
1452788_at	gb:BB535888 /DB_XREF=gi:16446599 /DB_XREF=BB535888 /CLONE=E030046H04 /FEA=mRNA /CNT=272 /TID=Mm.46613.1 /TIER=Stack /STK=127 /UG=Mm.46613 /LL=66702 /UG_GENE=4633401M22Rik /UG_TITLE=RIKEN cDNA 4633401M22 gene	399.15	1173.1	0.00259049	2.939	Ppp2r5e
1429003_at	gb:C79000 /DB_XREF=gi:2519330 /DB_XREF=C79000 /CLONE=J0058H02 /FEA=mRNA /CNT=61 /TID=Mm.27094.1 /TIER=Stack /STK=12 /UG=Mm.27094 /LL=66354 /UG_GENE=2310008B08Rik /UG_TITLE=RIKEN cDNA 2310008B08 gene	390.2	1143.75	0.00265512	2.93119	Snw1
1428951_at	gb:AV273443 /DB_XREF=gi:15405530 /DB_XREF=AV273443 /CLONE=4932411D22 /FEA=mRNA /CNT=61 /TID=Mm.12648.1 /TIER=Stack /STK=9 /UG=Mm.12648 /LL=70492 /UG_GENE=5730412B09Rik /UG_TITLE=RIKEN cDNA 5730412B09 gene	254.7	744.5	0.000234175	2.92305	Nol8
1421957_a_at	gb:NM_009981.1 /DB_XREF=gi:6753551 /GEN=Pcyt1a /FEA=FLmRNA /CNT=16 /TID=Mm.6161.1 /TIER=FL /STK=1 /UG=Mm.6161 /LL=13026 /DEF=Mus musculus phosphate cytidylyltransferase 1, choline, alpha isoform (Pcyt1a), mRNA. /PROD=CTP phosphocholine cytidylyl transferase /FL=gb:NM_009981.1	179.65	524.75	0.00443309	2.92096	Pcyt1a
1446265_at	gb:BB212531 /DB_XREF=gi:15410064 /DB_XREF=BB212531 /CLONE=A530001J08 /FEA=EST /CNT=2 /TID=Mm.209810.1 /TIER=ConsEnd /STK=2 /UG=Mm.209810 /UG_TITLE=ESTs	297.55	867.55	0.000477809	2.91564	BB212531
1452089_at	gb:AW106929 /DB_XREF=gi:6077729 /DB_XREF=um34d04.x1 /CLONE=IMAGE:2236423 /FEA=FLmRNA /CNT=79 /TID=Mm.28404.1 /TIER=Stack /STK=71 /UG=Mm.28404 /UG_TITLE=Mus musculus, clone MGC:31529 IMAGE:4501980, mRNA, complete cds /FL=gb:BC026479.1	891.75	2582.7	0.00114666	2.89622	Cacnb4
1438268_at	gb:BB527789 /DB_XREF=gi:16444532 /DB_XREF=BB527789 /CLONE=D930043C02 /FEA=EST /CNT=21 /TID=Mm.216644.1 /TIER=Stack /STK=11 /UG=Mm.216644 /UG_TITLE=ESTs, Moderately similar to unnamed protein product (H.sapiens)	417.4	1208.6	0.00152432	2.89554	Rc3h2
1423180_at	gb:BQ175822 /DB_XREF=gi:20351314 /DB_XREF=UI-M-DJ2-bwf-e-11-0-UI.s1 /CLONE=UI-M-DJ2-bwf-e-11-0-UI /FEA=FLmRNA /CNT=160 /TID=Mm.54162.1 /TIER=Stack /STK=8 /UG=Mm.54162 /LL=16500 /UG_GENE=Kcnb1 /UG_TITLE=potassium voltage gated channel, Shab-related subfamily, member 1 /FL=gb:NM_008420.1 gb:M64228.1	465.55	1344.8	0.00131693	2.88863	Kcnb1
1427319_at	gb:AI607603 /DB_XREF=gi:4616770 /DB_XREF=vk47f04.y1 /CLONE=IMAGE:949759 /FEA=mRNA /CNT=35 /TID=Mm.100634.1 /TIER=Stack /STK=9 /UG=Mm.100634 /UG_TITLE=Mus musculus, clone IMAGE:4485556, mRNA	350.05	1003.1	0.00023773	2.86559	A230046K03Rik
1415789_a_at	gb:BF158817 /DB_XREF=gi:11038907 /DB_XREF=601766168F1 /CLONE=IMAGE:3982121 /FEA=FLmRNA /CNT=376 /TID=Mm.23744.1 /TIER=Stack /STK=44 /UG=Mm.23744 /LL=79560 /UG_GENE=BC002236 /UG_TITLE=hypothetical protein, MGC: 7513 /FL=gb:BC002236.1 gb:NM_024475.1	619.8	1771.75	0.000925248	2.85858	Ublcp1
1456119_at	gb:AV334671 /DB_XREF=gi:16396307 /DB_XREF=AV334671 /CLONE=6330563B19 /FEA=EST /CNT=30 /TID=Mm.101058.1 /TIER=Stack /STK=15 /UG=Mm.101058 /LL=101677 /UG_GENE=AI850523 /UG_TITLE=expressed sequence AI850523	1043.2	2978.85	0.000656824	2.85549	Grm5
1434300_at	gb:BM247469 /DB_XREF=gi:17882739 /DB_XREF=K0802D07-3 /CLONE=K0802D07 /FEA=EST /CNT=158 /TID=Mm.35491.1 /TIER=Stack /STK=24 /UG=Mm.35491 /UG_TITLE=ESTs, Weakly similar to cyclic nucleotide-gated channel beta subunit (R.norvegicus)	119.8	342	0.00209853	2.85476	U2surp
1448885_at	gb:BB645629 /DB_XREF=gi:15402342 /DB_XREF=BB645629 /CLONE=B430305J03 /FEA=FLmRNA /CNT=101 /TID=Mm.26939.1 /TIER=Stack /STK=25 /UG=Mm.26939 /LL=74012 /UG_GENE=Rap2b /UG_TITLE=RAP2B, member of RAS oncogene family /FL=gb:NM_028712.1	639.2	1823.4	0.00191548	2.85263	Rap2b
1429560_at	gb:BM227942 /DB_XREF=gi:17790405 /DB_XREF=K0252F03-3 /CLONE=K0252F03 /FEA=mRNA /CNT=53 /TID=Mm.18810.3 /TIER=Stack /STK=14 /UG=Mm.18810 /LL=67255 /UG_GENE=2900028O21Rik /UG_TITLE=RIKEN cDNA 2900028O21 gene	411.1	1170.35	0.00504509	2.84687	Zfp955b
1424657_at	gb:BC016522.1 /DB_XREF=gi:16741396 /FEA=FLmRNA /CNT=43 /TID=Mm.24585.1 /TIER=FL+Stack /STK=21 /UG=Mm.24585 /DEF=Mus musculus, clone MGC:29021 IMAGE:3495957, mRNA, complete cds. /PROD=Unknown (protein for MGC:29021) /FL=gb:BC016522.1	1742.15	4947	0.00242435	2.83959	Taok1
1455057_at	gb:AV308908 /DB_XREF=gi:16394110 /DB_XREF=AV308908 /CLONE=5730574B22 /FEA=EST /CNT=31 /TID=Mm.117071.1 /TIER=Stack /STK=27 /UG=Mm.117071 /UG_TITLE=ESTs	570.35	1609.5	0.0027618	2.82195	Gmps
1438719_at	gb:AV381143 /DB_XREF=gi:16398277 /DB_XREF=AV381143 /CLONE=9230108P05 /FEA=EST /CNT=15 /TID=Mm.100184.1 /TIER=Stack /STK=9 /UG=Mm.100184 /UG_TITLE=ESTs	43.15	121.6	0.00759533	2.81808	Map3k2
1451920_a_at	gb:M88489.1 /DB_XREF=gi:1066814 /FEA=FLmRNA /CNT=1 /TID=Mm.148877.2 /TIER=FL /STK=1 /UG=Mm.148877 /LL=19687 /UG_GENE=Recc1 /DEF=Mus musculus nonamer binding protein mRNA, complete cds. /PROD=nonamer binding protein /FL=gb:M88489.1	125.25	352.55	0.000933984	2.81477	Recc1
1439450_x_at	gb:BB267264 /DB_XREF=gi:8963731 /DB_XREF=BB267264 /CLONE=A830029G20 /FEA=EST /CNT=8 /TID=Mm.100634.3 /TIER=Stack /STK=8 /UG=Mm.100634 /UG_TITLE=Mus musculus, clone IMAGE:4485556, mRNA	361.6	1017.8	8.95254e-05	2.81471	A230046K03Rik
1418610_at	gb:NM_080853.1 /DB_XREF=gi:18252795 /GEN=Slc17a6 /FEA=FLmRNA /CNT=37 /TID=Mm.70945.1 /TIER=FL+Stack /STK=21 /UG=Mm.70945 /LL=140919 /DEF=Mus musculus solute carrier family 17 (vesicular glutamate transporter), member 6 (Slc17a6), mRNA. /PROD=solute carrier family 17 (vesicular glutamatetransporter), member 6 /FL=gb:AF324864.1 gb:NM_080853.1	241.5	679.5	0.00495879	2.81366	Slc17a6
1431403_a_at	gb:AK019929.1 /DB_XREF=gi:12860336 /FEA=mRNA /CNT=3 /TID=Mm.160079.2 /TIER=ConsEnd /STK=0 /UG=Mm.160079 /LL=78283 /UG_GENE=5330432J06Rik /UG_TITLE=RIKEN cDNA 5330432J06 gene /DEF=Mus musculus adult male pituitary gland cDNA, RIKEN full-length enriched library, clone:5330432J06:hypothetical protein, full insert sequence.	800.35	2249.85	0.00296763	2.81108	Map7d2
1436577_at	gb:BB380620 /DB_XREF=gi:16407931 /DB_XREF=BB380620 /CLONE=C230007P09 /FEA=EST /CNT=12 /TID=Mm.153112.1 /TIER=Stack /STK=8 /UG=Mm.153112 /UG_TITLE=ESTs	858.85	2412.1	0.0025776	2.80852	Arhgef9
1450537_at	gb:AF196480.1 /DB_XREF=gi:6358716 /GEN=Fxy2 /FEA=FLmRNA /CNT=4 /TID=Mm.25678.1 /TIER=FL /STK=1 /UG=Mm.25678 /LL=23947 /DEF=Mus musculus RING finger protein (Fxy2) mRNA, complete cds. /PROD=RING finger protein /FL=gb:NM_011845.1 gb:AF196480.1	54.65	153.3	0.00149203	2.80512	Mid2
1455799_at	gb:BB751387 /DB_XREF=gi:16155623 /DB_XREF=BB751387 /CLONE=G130205F15 /FEA=EST /CNT=78 /TID=Mm.100268.1 /TIER=Stack /STK=77 /UG=Mm.100268 /UG_TITLE=ESTs	132.95	371.9	0.00570421	2.79729	Rorb
1436981_a_at	gb:BB706206 /DB_XREF=gi:16055041 /DB_XREF=BB706206 /CLONE=7420487L24 /FEA=EST /CNT=38 /TID=Mm.3360.4 /TIER=ConsEnd /STK=0 /UG=Mm.3360 /LL=22631 /UG_GENE=Ywhaz /UG_TITLE=tyrosine 3-monooxygenasetryptophan 5-monooxygenase activation protein, zeta polypeptide	230.45	644	0.00423819	2.79453	Ywhaz
1438714_at	gb:BB622498 /DB_XREF=gi:16461523 /DB_XREF=BB622498 /CLONE=6430408J18 /FEA=EST /CNT=21 /TID=Mm.12236.4 /TIER=Stack /STK=9 /UG=Mm.12236 /LL=22680 /UG_GENE=Zfp207 /UG_TITLE=zinc finger protein 207	383.7	1069.75	0.00203104	2.78799	Zfp207
1417136_s_at	gb:BG805074 /DB_XREF=gi:17952002 /DB_XREF=0612-12 /FEA=FLmRNA /CNT=188 /TID=Mm.8709.1 /TIER=Stack /STK=35 /UG=Mm.8709 /LL=20817 /UG_GENE=Srpk2 /UG_TITLE=serinearginine-rich protein specific kinase 2 /FL=gb:AB006036.1 gb:BC020178.1 gb:NM_009274.1	763.95	2127.6	0.000876381	2.785	Srpk2
1436229_at	gb:BB256501 /DB_XREF=gi:8949334 /DB_XREF=BB256501 /CLONE=A730073N12 /FEA=EST /CNT=14 /TID=Mm.94709.1 /TIER=Stack /STK=10 /UG=Mm.94709 /UG_TITLE=ESTs	690.2	1920.45	0.00103884	2.78245	BB256501
1427573_at	gb:Y11896.1 /DB_XREF=gi:2196873 /GEN=Brx /FEA=mRNA /CNT=4 /TID=Mm.42223.1 /TIER=ConsEnd /STK=0 /UG=Mm.42223 /LL=12212 /DEF=Mus musculus mRNA for cysteine-rich hydrophobic 1 (CHIC1) protein, partial. /PROD=cysteine-rich hydrophobic 1 (CHIC1) protein	126.4	350.9	0.00368623	2.77611	Chic1
1416062_at	gb:BF577643 /DB_XREF=gi:11651355 /DB_XREF=602092518F1 /CLONE=IMAGE:4206676 /FEA=FLmRNA /CNT=232 /TID=Mm.22252.1 /TIER=Stack /STK=8 /UG=Mm.22252 /LL=66687 /UG_GENE=4432405K22Rik /UG_TITLE=RIKEN cDNA 4432405K22 gene /FL=gb:NM_025706.1	79.8	220.75	0.00106301	2.76629	Ly6dl
1426389_at	gb:BB818719 /DB_XREF=gi:16991348 /DB_XREF=BB818719 /CLONE=G730046C05 /FEA=FLmRNA /CNT=101 /TID=Mm.26888.1 /TIER=Stack /STK=12 /UG=Mm.26888 /UG_TITLE=Mus musculus, Similar to hypothetical gene supported by AF086316, clone MGC:32485 IMAGE:5052777, mRNA, complete cds /FL=gb:BC025011.2	609.75	1685.95	0.00106638	2.76499	Camk1d
1444004_at	gb:BB375353 /DB_XREF=gi:16407391 /DB_XREF=BB375353 /CLONE=C130079J24 /FEA=EST /CNT=7 /TID=Mm.25284.1 /TIER=ConsEnd /STK=2 /UG=Mm.25284 /UG_TITLE=ESTs, Highly similar to dJ1189B24.4 (H.sapiens)	293.45	810.05	0.00220242	2.76044	Thoc2
1427640_a_at	gb:X79989.1 /DB_XREF=gi:510534 /FEA=mRNA /CNT=2 /TID=Mm.4909.2 /TIER=ConsEnd /STK=0 /UG=Mm.4909 /LL=12395 /UG_GENE=Cbfa2t1h /UG_TITLE=CBFA2T1 identified gene homolog (human) /DEF=M.musculus ETO mRNA.	213.05	587.75	0.00311743	2.75874	Cbfa2t1h
1448794_s_at	gb:BG067003 /DB_XREF=gi:12549572 /DB_XREF=H3049E03-3 /CLONE=H3049E03 /FEA=FLmRNA /CNT=94 /TID=Mm.2467.1 /TIER=Stack /STK=8 /UG=Mm.2467 /LL=22792 /UG_GENE=Zrf2 /UG_TITLE=zuotin related factor 2 /FL=gb:NM_009584.1 gb:D63784.1	363.75	997.1	0.00929416	2.74117	Dnajc2
1421064_at	gb:NM_019579.1 /DB_XREF=gi:9625022 /GEN=Mpp5 /FEA=FLmRNA /CNT=54 /TID=Mm.30561.1 /TIER=FL /STK=2 /UG=Mm.30561 /LL=56217 /DEF=Mus musculus membrane protein, palmitoylated 5 (MAGUK p55 subfamily member 5) (Mpp5), mRNA. /PROD=membrane protein, palmitoylated 3 (MAGUK p55subfamily member 5) /FL=gb:NM_019579.1 gb:AF199008.1	303.95	832.55	0.000884176	2.7391	Mpp5
1437179_at	gb:BG070871 /DB_XREF=gi:12553528 /DB_XREF=H3093B06-3 /CLONE=H3093B06 /FEA=EST /CNT=33 /TID=Mm.12647.1 /TIER=Stack /STK=23 /UG=Mm.12647 /UG_TITLE=ESTs, Moderately similar to unnamed protein product (H.sapiens)	233.95	639.6	0.000902841	2.73392	Rif1
1448406_at	gb:BC010712.1 /DB_XREF=gi:14919446 /FEA=FLmRNA /CNT=173 /TID=Mm.44244.1 /TIER=FL /STK=6 /UG=Mm.44244 /LL=58521 /UG_GENE=ORF12 /DEF=Mus musculus, Similar to open reading frame 12, clone MGC:6836 IMAGE:2649456, mRNA, complete cds. /PROD=Similar to open reading frame 12 /FL=gb:BC010712.1 gb:NM_025613.1	2271.45	6190.85	1.6046e-05	2.72551	Eid1
1449446_at	gb:BC027401.1 /DB_XREF=gi:20073253 /FEA=FLmRNA /CNT=79 /TID=Mm.33787.1 /TIER=FL+Stack /STK=10 /UG=Mm.33787 /LL=66502 /UG_GENE=2300004H16Rik /DEF=Mus musculus, Similar to RIKEN cDNA 2300004H16 gene, clone MGC:35732 IMAGE:4948072, mRNA, complete cds. /PROD=Similar to RIKEN cDNA 2300004H16 gene /FL=gb:NM_025602.1 gb:BC027401.1	165.85	451.95	0.00826177	2.72505	Ccdc59
1458439_a_at	gb:BM231657 /DB_XREF=gi:17866927 /DB_XREF=K0312G04-3 /CLONE=K0312G04 /FEA=EST /CNT=10 /TID=Mm.86668.1 /TIER=ConsEnd /STK=2 /UG=Mm.86668 /UG_TITLE=ESTs, Moderately similar to T00362 hypothetical protein KIAA0675 (H.sapiens)	540.25	1471.25	0.00126693	2.72328	Dzip3
1437110_at	gb:BM232998 /DB_XREF=gi:17868268 /DB_XREF=K0331A04-3 /CLONE=K0331A04 /FEA=EST /CNT=48 /TID=Mm.103435.2 /TIER=Stack /STK=25 /UG=Mm.103435 /UG_TITLE=Mus musculus, clone IMAGE:4952280, mRNA	116.95	318.25	0.00875223	2.72125	2810474O19Rik
1436743_at	gb:BB543585 /DB_XREF=gi:9614808 /DB_XREF=BB543585 /CLONE=E130211C21 /FEA=EST /CNT=87 /TID=Mm.100843.1 /TIER=Stack /STK=72 /UG=Mm.100843 /UG_TITLE=ESTs	471.65	1280.95	0.00514098	2.71589	BB543585
1423162_s_at	gb:BQ044290 /DB_XREF=gi:19794712 /DB_XREF=UI-M-EF0-bum-b-24-0-UI.r1 /CLONE=IMAGE:5683895 /FEA=FLmRNA /CNT=111 /TID=Mm.39505.1 /TIER=ConsEnd /STK=1 /UG=Mm.39505 /LL=114715 /UG_GENE=Spred1-pending /UG_TITLE=sprouty protein with EVH-1 domain 1, related sequence /FL=gb:NM_033524.1 gb:AB063495.1	481.5	1306.45	0.00201389	2.71329	Spred1
1416084_at	gb:AA124553 /DB_XREF=gi:1682401 /DB_XREF=mp81d05.r1 /CLONE=IMAGE:575625 /FEA=FLmRNA /CNT=276 /TID=Mm.2904.1 /TIER=Stack /STK=20 /UG=Mm.2904 /LL=22682 /UG_GENE=Zfp216 /UG_TITLE=zinc finger protein 216 /FL=gb:NM_009551.1 gb:AF062071.1	317.95	861.85	0.0035849	2.71065	Zfp216
1456492_at	gb:BB279767 /DB_XREF=gi:16401194 /DB_XREF=BB279767 /CLONE=A930019L04 /FEA=EST /CNT=22 /TID=Mm.27057.1 /TIER=Stack /STK=9 /UG=Mm.27057 /LL=97447 /UG_GENE=C77863 /UG_TITLE=expressed sequence C77863	272.5	738.35	0.00144548	2.70954	Mau2
1438214_at	gb:BB483226 /DB_XREF=gi:16441010 /DB_XREF=BB483226 /CLONE=D430019F04 /FEA=EST /CNT=36 /TID=Mm.202349.1 /TIER=Stack /STK=11 /UG=Mm.202349 /LL=105840 /UG_GENE=AI447310 /UG_TITLE=expressed sequence AI447310	465.55	1257.1	0.000295386	2.70025	Trps1
1458114_at	gb:AV347618 /DB_XREF=gi:15406641 /DB_XREF=AV347618 /CLONE=6430605L05 /FEA=EST /CNT=3 /TID=Mm.208953.1 /TIER=ConsEnd /STK=3 /UG=Mm.208953 /UG_TITLE=ESTs	238.5	643.9	0.00299215	2.69979	AV347618
1450420_at	gb:BQ174473 /DB_XREF=gi:20349964 /DB_XREF=UI-M-DJ2-bvy-o-13-0-UI.s1 /CLONE=UI-M-DJ2-bvy-o-13-0-UI /FEA=FLmRNA /CNT=54 /TID=Mm.42135.1 /TIER=ConsEnd /STK=6 /UG=Mm.42135 /LL=20842 /UG_GENE=Stag1 /UG_TITLE=stromal antigen 1 /FL=gb:NM_009282.1	226.2	610.35	0.00574753	2.69828	Stag1
1452708_a_at	gb:AV309996 /DB_XREF=gi:16394198 /DB_XREF=AV309996 /CLONE=5730587D06 /FEA=mRNA /CNT=96 /TID=Mm.154591.1 /TIER=Stack /STK=9 /UG=Mm.154591 /LL=66978 /UG_GENE=Luc7l /UG_TITLE=Luc7 homolog (S. cerevisiae)-like	96.55	259.6	0.00369429	2.68876	Luc7l
1457045_at	gb:BB632261 /DB_XREF=gi:16468873 /DB_XREF=BB632261 /CLONE=A230020F20 /FEA=EST /CNT=12 /TID=Mm.156869.1 /TIER=ConsEnd /STK=5 /UG=Mm.156869 /LL=99464 /UG_GENE=BB182356 /UG_TITLE=expressed sequence BB182356	115.9	311.3	0.00546197	2.68594	Galnt13
1452079_s_at	gb:AV048122 /DB_XREF=gi:4867787 /DB_XREF=AV048122 /CLONE=1700072P13 /FEA=FLmRNA /CNT=99 /TID=Mm.30127.2 /TIER=Stack /STK=18 /UG=Mm.30127 /LL=54339 /UG_GENE=Tes3-ps /UG_TITLE=testis derived transcript 3, pseudogene /FL=gb:BC020161.1	236.7	634.8	0.00288312	2.68188	Tes3-ps
1435583_at	gb:AU067633 /DB_XREF=gi:4968370 /DB_XREF=AU067633 /CLONE=MNCb-0062 /FEA=EST /CNT=19 /TID=Mm.70969.1 /TIER=Stack /STK=15 /UG=Mm.70969 /UG_TITLE=ESTs, Weakly similar to POL2 MOUSE RETROVIRUS-RELATED POL POLYPROTEIN (M.musculus)	1028.75	2750.45	0.00328767	2.67358	AU067633
1434405_at	gb:BB360713 /DB_XREF=gi:16405874 /DB_XREF=BB360713 /CLONE=C030049E06 /FEA=EST /CNT=77 /TID=Mm.34087.1 /TIER=Stack /STK=14 /UG=Mm.34087 /LL=103833 /UG_GENE=AI838773 /UG_TITLE=expressed sequence AI838773	387.8	1036.55	0.00433365	2.6729	Fnip1
1418230_a_at	gb:BC005621.1 /DB_XREF=gi:13542843 /FEA=FLmRNA /CNT=178 /TID=Mm.29097.1 /TIER=FL+Stack /STK=27 /UG=Mm.29097 /LL=110829 /UG_GENE=Lims1l /DEF=Mus musculus, RIKEN cDNA 4921524A02 gene, clone MGC:11585 IMAGE:3711611, mRNA, complete cds. /PROD=RIKEN cDNA 4921524A02 gene /FL=gb:NM_026148.1 gb:BC005621.1	153.95	409.85	0.00392155	2.66223	Lims1l
1430309_at	gb:BC025455.1 /DB_XREF=gi:19343663 /FEA=mRNA /CNT=16 /TID=Mm.29384.1 /TIER=ConsEnd /STK=2 /UG=Mm.29384 /LL=71175 /UG_GENE=4933421G18Rik /UG_TITLE=RIKEN cDNA 4933421G18 gene /DEF=Mus musculus, RIKEN cDNA 4933421G18 gene, clone IMAGE:5354629, mRNA.	521.6	1385.4	0.00094439	2.65606	Nipbl
1430026_at	gb:AK021006.1 /DB_XREF=gi:12861762 /FEA=mRNA /CNT=18 /TID=Mm.26704.1 /TIER=ConsEnd /STK=4 /UG=Mm.26704 /LL=78846 /UG_GENE=B230217N24Rik /UG_TITLE=RIKEN cDNA B230217N24 gene /DEF=Mus musculus adult male corpora quadrigemina cDNA, RIKEN full-length enriched library, clone:B230217N24:homolog to MICROSOMAL STRESS 70 PROTEIN ATPASE CORE, full insert sequence.	52.95	140.15	0.00152828	2.64684	Stch
1451485_at	gb:AW536179 /DB_XREF=gi:7178596 /DB_XREF=G0101D08-3 /CLONE=G0101D08 /FEA=FLmRNA /CNT=88 /TID=Mm.30927.1 /TIER=Stack /STK=13 /UG=Mm.30927 /LL=67684 /UG_GENE=3300001P08Rik /UG_TITLE=RIKEN cDNA 3300001P08 gene /FL=gb:BC009092.1	395.4	1045.5	0.00150515	2.64416	Luc7l3
1424349_a_at	gb:BC013667.1 /DB_XREF=gi:15489110 /FEA=FLmRNA /CNT=65 /TID=Mm.205957.1 /TIER=FL+Stack /STK=36 /UG=Mm.205957 /DEF=Mus musculus, Similar to KIAA0205 gene product, clone MGC:18768 IMAGE:4020003, mRNA, complete cds. /PROD=Similar to KIAA0205 gene product /FL=gb:BC013667.1	2150.4	5669.4	0.000161347	2.63644	Lpgat1
1450743_s_at	gb:BG920261 /DB_XREF=gi:14300737 /DB_XREF=602822344F1 /CLONE=IMAGE:4951330 /FEA=FLmRNA /CNT=67 /TID=Mm.196461.1 /TIER=Stack /STK=12 /UG=Mm.196461 /LL=56393 /UG_GENE=Nsap1l-pending /UG_TITLE=NS1-associated protein 1-like /FL=gb:NM_019666.1 gb:AF093821.1	92.45	243.5	0.00533492	2.63386	Nsap1
1460567_at	gb:BB148972 /DB_XREF=gi:15408914 /DB_XREF=BB148972 /CLONE=9930116O05 /FEA=EST /CNT=83 /TID=Mm.32081.1 /TIER=Stack /STK=11 /UG=Mm.32081 /UG_TITLE=ESTs	517.2	1362.2	0.00290135	2.6338	Rfx7
1439517_at	gb:BB660695 /DB_XREF=gi:16494477 /DB_XREF=BB660695 /CLONE=D530041J11 /FEA=EST /CNT=10 /TID=Mm.202463.1 /TIER=ConsEnd /STK=7 /UG=Mm.202463 /UG_TITLE=ESTs	44.75	117.85	0.000191607	2.63352	Mysm1
1457275_at	gb:AI594683 /DB_XREF=gi:4603731 /DB_XREF=vt55h01.x1 /CLONE=IMAGE:1167025 /FEA=EST /CNT=10 /TID=Mm.83561.1 /TIER=ConsEnd /STK=4 /UG=Mm.83561 /UG_TITLE=ESTs	627.15	1648.15	0.000454931	2.628	Dnm
1447863_s_at	gb:BB322941 /DB_XREF=gi:9031255 /DB_XREF=BB322941 /CLONE=B330020N18 /FEA=EST /CNT=2 /TID=Mm.149186.1 /TIER=ConsEnd /STK=2 /UG=Mm.149186 /UG_TITLE=ESTs, Moderately similar to NR42 MOUSE ORPHAN NUCLEAR RECEPTOR NURR1 (M.musculus)	1267.35	3327.25	0.00115779	2.62536	Nurr1
1438784_at	gb:BB329234 /DB_XREF=gi:16403915 /DB_XREF=BB329234 /CLONE=B630002E05 /FEA=EST /CNT=11 /TID=Mm.41159.2 /TIER=Stack /STK=9 /UG=Mm.41159 /UG_TITLE=ESTs	605.95	1590.15	0.00341079	2.62423	Rit1
1437719_x_at	gb:BB387783 /DB_XREF=gi:9110610 /DB_XREF=BB387783 /CLONE=C230053B21 /FEA=EST /CNT=15 /TID=Mm.100634.2 /TIER=Stack /STK=15 /UG=Mm.100634 /UG_TITLE=Mus musculus, clone IMAGE:4485556, mRNA	253.65	664.3	6.89757e-05	2.61896	A230046K03Rik
1417069_a_at	gb:BG066438 /DB_XREF=gi:12549007 /DB_XREF=H3043A05-3 /CLONE=H3043A05 /FEA=FLmRNA /CNT=164 /TID=Mm.87312.1 /TIER=Stack /STK=15 /UG=Mm.87312 /LL=63985 /UG_GENE=Gmfb /UG_TITLE=glia maturation factor, beta /FL=gb:AF297220.1 gb:NM_022023.1	502	1314.45	0.000179122	2.61843	Gmfb
1455980_a_at	gb:BB770972 /DB_XREF=gi:16197271 /DB_XREF=BB770972 /CLONE=G370118O13 /FEA=EST /CNT=47 /TID=Mm.11982.1 /TIER=Stack /STK=21 /UG=Mm.11982 /UG_TITLE=ESTs	59.65	156.05	0.000131883	2.61609	Gm240
1424778_at	gb:BC004607.1 /DB_XREF=gi:13435475 /FEA=FLmRNA /CNT=83 /TID=Mm.41272.1 /TIER=FL+Stack /STK=16 /UG=Mm.41272 /LL=28193 /UG_GENE=D10Ucla1 /DEF=Mus musculus, clone MGC:6708 IMAGE:3585133, mRNA, complete cds. /PROD=Unknown (protein for MGC:6708) /FL=gb:BC004607.1	359.65	938.95	0.000384317	2.61073	Reep3
1427937_at	gb:BB400843 /DB_XREF=gi:15411794 /DB_XREF=BB400843 /CLONE=C330020E23 /FEA=mRNA /CNT=97 /TID=Mm.41102.1 /TIER=Stack /STK=16 /UG=Mm.41102 /LL=67048 /UG_GENE=2610030H06Rik /UG_TITLE=RIKEN cDNA 2610030H06 gene	812.7	2120.35	0.00238167	2.60902	Vma21
1426702_at	gb:BM055600 /DB_XREF=gi:16813635 /DB_XREF=id84e01.x1 /CLONE=IMAGE:5669856 /FEA=mRNA /CNT=145 /TID=Mm.30254.1 /TIER=ConsEnd /STK=2 /UG=Mm.30254 /LL=74349 /UG_GENE=4632419K20Rik /UG_TITLE=RIKEN cDNA 4632419K20 gene	125.55	327.5	0.00455894	2.60852	Fam160a2
1417736_at	gb:BM225266 /DB_XREF=gi:17786792 /DB_XREF=K0208H12-3 /CLONE=K0208H12 /FEA=FLmRNA /CNT=124 /TID=Mm.70309.1 /TIER=Stack /STK=10 /UG=Mm.70309 /LL=66669 /UG_GENE=3830418C19Rik /UG_TITLE=RIKEN cDNA 3830418C19 gene /FL=gb:NM_025695.1 gb:BC026429.1	146.1	379.4	0.000577088	2.59685	Smc6
1419034_at	gb:NM_007788.1 /DB_XREF=gi:7106274 /GEN=Csnk2a1-rs4 /FEA=FLmRNA /CNT=162 /TID=Mm.23692.1 /TIER=FL+Stack /STK=14 /UG=Mm.23692 /LL=12999 /DEF=Mus musculus casein kinase II, alpha 1 related sequence 4 (Csnk2a1-rs4), mRNA. /PROD=casein kinase II, alpha 1 related sequence 4 /FL=gb:NM_007788.1 gb:U51866.1 gb:BC026149.1	130.85	338.8	0.00276391	2.58922	Csnk2a1
1425575_at	gb:BB292785 /DB_XREF=gi:16401604 /DB_XREF=BB292785 /CLONE=B130014J09 /FEA=FLmRNA /CNT=41 /TID=Mm.1977.1 /TIER=Stack /STK=14 /UG=Mm.1977 /LL=13837 /UG_GENE=Epha3 /UG_TITLE=Eph receptor A3 /FL=gb:M68513.1	190.95	491.95	0.00218829	2.57633	Epha3
1422910_s_at	gb:AU022584 /DB_XREF=gi:3387559 /DB_XREF=AU022584 /CLONE=J0416H06 /FEA=FLmRNA /CNT=34 /TID=Mm.219634.1 /TIER=Stack /STK=9 /UG=Mm.219634 /LL=67241 /UG_GENE=2810489L22Rik /UG_TITLE=RIKEN cDNA 2810489L22 gene /FL=gb:NM_026052.1	258.3	664.9	0.00504841	2.57414	Smc6
1435135_at	gb:BB514928 /DB_XREF=gi:16442968 /DB_XREF=BB514928 /CLONE=D830006A14 /FEA=EST /CNT=245 /TID=Mm.24576.1 /TIER=Stack /STK=64 /UG=Mm.24576 /UG_TITLE=ESTs, Weakly similar to AF182426 1 arylacetamide deacetylase (R.norvegicus)	1318.75	3393.5	0.00332538	2.57327	Nceh
1422733_at	gb:NM_010218.1 /DB_XREF=gi:6753879 /GEN=Fjx1 /FEA=FLmRNA /CNT=104 /TID=Mm.29730.1 /TIER=FL+Stack /STK=15 /UG=Mm.29730 /LL=14221 /DEF=Mus musculus four jointed box 1 (Drosophila) (Fjx1), mRNA. /PROD=four jointed box 1 (Drosophila) /FL=gb:NM_010218.1	588.35	1513.65	0.0023639	2.5727	Fjx1
1421754_at	gb:NM_133243.1 /DB_XREF=gi:18875413 /GEN=AY036118 /FEA=FLmRNA /CNT=2 /TID=MmAffx.1.3 /TIER=FL /STK=2 /NOTE=sequence(s) not in UniGene /DEF=Mus musculus cDNA sequence AY036118 (AY036118), mRNA. /PROD=cDNA sequence AY036118 /FL=gb:AY036118.1 gb:NM_133243.1	1462.7	3741.8	0.00227888	2.55815	AY036118
1416160_at	gb:AI463873 /DB_XREF=gi:4317903 /DB_XREF=va66e02.y1 /CLONE=IMAGE:736346 /FEA=FLmRNA /CNT=177 /TID=Mm.16519.1 /TIER=ConsEnd /STK=0 /UG=Mm.16519 /LL=11819 /UG_GENE=Nr2f2 /UG_TITLE=nuclear receptor subfamily 2, group F, member 2 /FL=gb:NM_009697.1 gb:U07635.1	83.65	213.75	0.0053418	2.55529	Nr2f2
1437002_at	gb:BB303443 /DB_XREF=gi:16402056 /DB_XREF=BB303443 /CLONE=B230104G24 /FEA=EST /CNT=51 /TID=Mm.135018.2 /TIER=Stack /STK=30 /UG=Mm.135018 /LL=99746 /UG_GENE=AI852168 /UG_TITLE=expressed sequence AI852168	374	954.85	2.22289e-05	2.55307	Fam73a
1435520_at	gb:BB418489 /DB_XREF=gi:16423415 /DB_XREF=BB418489 /CLONE=C530010I15 /FEA=EST /CNT=101 /TID=Mm.35930.1 /TIER=Stack /STK=15 /UG=Mm.35930 /LL=103787 /UG_GENE=AI563628 /UG_TITLE=expressed sequence AI563628	277.7	708.75	0.00931376	2.55221	Msi2
1457281_at	gb:BB224547 /DB_XREF=gi:16353898 /DB_XREF=BB224547 /CLONE=A530087B18 /FEA=EST /CNT=9 /TID=Mm.86710.1 /TIER=ConsEnd /STK=4 /UG=Mm.86710 /UG_TITLE=ESTs, Weakly similar to T24396 hypothetical protein T03F6.2 - Caenorhabditis elegans (C.elegans)	237	604.7	0.00242043	2.55148	Dnajc21
1436898_at	gb:BI738328 /DB_XREF=gi:15715341 /DB_XREF=603361584F1 /CLONE=IMAGE:5368748 /FEA=EST /CNT=50 /TID=Mm.43213.3 /TIER=Stack /STK=37 /UG=Mm.43213 /LL=71514 /UG_GENE=9030402K04Rik /UG_TITLE=RIKEN cDNA 9030402K04 gene	334.75	841.95	0.00143591	2.51516	603361584F1
1435163_at	gb:BB008634 /DB_XREF=gi:15403209 /DB_XREF=BB008634 /CLONE=4732483N19 /FEA=EST /CNT=29 /TID=Mm.27433.1 /TIER=Stack /STK=19 /UG=Mm.27433 /LL=106525 /UG_GENE=AI118577 /UG_TITLE=expressed sequence AI118577	405.35	1018.2	0.000931865	2.5119	Zfp871
1456048_at	gb:BB281000 /DB_XREF=gi:15411106 /DB_XREF=BB281000 /CLONE=A930029D04 /FEA=EST /CNT=27 /TID=Mm.203968.4 /TIER=Stack /STK=18 /UG=Mm.203968 /LL=69104 /UG_GENE=1810015H18Rik /UG_TITLE=RIKEN cDNA 1810015H18 gene	628.5	1577.55	0.000256508	2.51002	Cpeb3
1418514_at	gb:NM_013827.1 /DB_XREF=gi:7305288 /GEN=Mtf2 /FEA=FLmRNA /CNT=185 /TID=Mm.10563.1 /TIER=FL+Stack /STK=22 /UG=Mm.10563 /LL=17765 /DEF=Mus musculus metal response element binding transcription factor 2 (Mtf2), mRNA. /PROD=metal response element binding transcriptionfactor 2 /FL=gb:S78454.1 gb:NM_013827.1	309.75	775.6	0.00220826	2.50395	Mtf2
1417379_at	gb:NM_016721.1 /DB_XREF=gi:7710041 /GEN=Iqgap1 /FEA=FLmRNA /CNT=234 /TID=Mm.56685.1 /TIER=FL+Stack /STK=46 /UG=Mm.56685 /LL=29875 /DEF=Mus musculus IQ motif containing GTPase activating protein 1 (Iqgap1), mRNA. /PROD=IQ motif containing GTPase activating protein 1 /FL=gb:NM_016721.1 gb:AF240630.1	236.35	591.45	0.00056333	2.50243	Iqgap1
1431804_a_at	gb:AK004607.1 /DB_XREF=gi:12835892 /FEA=mRNA /CNT=1 /TID=Mm.28513.2 /TIER=ConsEnd /STK=0 /UG=Mm.28513 /LL=20687 /UG_GENE=Sp3 /UG_TITLE=trans-acting transcription factor 3 /DEF=Mus musculus adult male lung cDNA, RIKEN full-length enriched library, clone:1200006A08:trans-acting transcription factor 3, full insert sequence.	522.7	1307	0.000828271	2.50048	Sp3
1422025_at	gb:NM_008601.1 /DB_XREF=gi:6678883 /GEN=Mitf /FEA=FLmRNA /CNT=16 /TID=Mm.100641.1 /TIER=FL /STK=1 /UG=Mm.100641 /LL=17342 /DEF=Mus musculus microphthalmia-associated transcription factor (Mitf), mRNA. /PROD=microphthalmia-associated transcription factor /FL=gb:NM_008601.1	44.15	110.2	0.00401974	2.49604	Mitf
1449999_a_at	gb:NM_009784.1 /DB_XREF=gi:6753233 /GEN=Cacna2d1 /FEA=FLmRNA /CNT=3 /TID=Mm.30841.1 /TIER=FL /STK=3 /UG=Mm.30841 /LL=12293 /DEF=Mus musculus calcium channel, voltage-dependent, alpha2delta subunit 1 (Cacna2d1), mRNA. /PROD=calcium channel, voltage-dependent, alpha2deltasubunit 1 /FL=gb:U73484.1 gb:U73487.1 gb:NM_009784.1	389.2	970.95	0.00165601	2.49473	Cacna2
1431096_at	gb:BB661182 /DB_XREF=gi:16494961 /DB_XREF=BB661182 /CLONE=D630025N02 /FEA=mRNA /CNT=15 /TID=Mm.158856.1 /TIER=ConsEnd /STK=0 /UG=Mm.158856 /LL=72656 /UG_GENE=2810013E07Rik /UG_TITLE=RIKEN cDNA 2810013E07 gene	51.3	127.8	0.00818571	2.49123	Ints8
1430996_at	gb:BG867902 /DB_XREF=gi:14218442 /DB_XREF=602787137F1 /CLONE=IMAGE:4913360 /FEA=mRNA /CNT=40 /TID=Mm.196190.1 /TIER=ConsEnd /STK=0 /UG=Mm.196190 /LL=75320 /UG_GENE=4930555L11Rik /UG_TITLE=RIKEN cDNA 4930555L11 gene	188	467.55	0.000968952	2.48697	Etnk1
1426327_s_at	gb:U05343.1 /DB_XREF=gi:453375 /GEN=Pzf /FEA=FLmRNA /CNT=27 /TID=Mm.140246.1 /TIER=FL /STK=0 /UG=Mm.140246 /LL=109910 /DEF=Mus musculus Balbc zinc finger protein PZF (Pzf) mRNA, complete cds. /PROD=zinc finger protein PZF /FL=gb:U05343.1	185.25	460.55	0.00589947	2.4861	Pzf
1426514_at	gb:AK019474.1 /DB_XREF=gi:12859701 /FEA=FLmRNA /CNT=106 /TID=Mm.19291.1 /TIER=Stack /STK=61 /UG=Mm.19291 /LL=77590 /UG_GENE=4631426J05Rik /UG_TITLE=RIKEN cDNA 4631426J05 gene /DEF=Mus musculus 0 day neonate skin cDNA, RIKEN full-length enriched library, clone:4631426J05:homolog to KIAA0598 PROTEIN, full insert sequence. /FL=gb:AF320786.1	238.95	592.25	0.00476951	2.47855	Chst15
1431293_a_at	gb:AK012260.1 /DB_XREF=gi:12848888 /FEA=mRNA /CNT=5 /TID=Mm.29482.3 /TIER=ConsEnd /STK=0 /UG=Mm.29482 /LL=27681 /UG_GENE=D11Moh34 /UG_TITLE=DNA segment, Chr 11, KL Mohlke 34 /DEF=Mus musculus 11 days embryo whole body cDNA, RIKEN full-length enriched library, clone:2700018K11:DNA segment, Chr 11, KL Mohlke 34, full insert sequence.	1661.3	4110.75	0.000859045	2.47442	Cldnd1
1428497_at	gb:AA198634 /DB_XREF=gi:1794361 /DB_XREF=mu17d02.r1 /CLONE=IMAGE:639651 /FEA=mRNA /CNT=89 /TID=Mm.46606.1 /TIER=Stack /STK=8 /UG=Mm.46606 /LL=72360 /UG_GENE=2210413N07Rik /UG_TITLE=RIKEN cDNA 2210413N07 gene	141.6	350	0.00315556	2.47175	Secisbp2
1441063_at	gb:BB229155 /DB_XREF=gi:16354277 /DB_XREF=BB229155 /CLONE=A630020B03 /FEA=EST /CNT=6 /TID=Mm.139138.1 /TIER=ConsEnd /STK=4 /UG=Mm.139138 /UG_TITLE=ESTs	95	234.8	0.00230737	2.47158	Ago3
1437757_at	gb:BB402190 /DB_XREF=gi:15411829 /DB_XREF=BB402190 /CLONE=C330026H15 /FEA=EST /CNT=26 /TID=Mm.132662.1 /TIER=Stack /STK=14 /UG=Mm.132662 /UG_TITLE=ESTs, Weakly similar to S12207 hypothetical protein (M.musculus)	77.3	191.05	0.00419453	2.47154	BB402190
1452379_at	gb:AK012475.1 /DB_XREF=gi:12849245 /FEA=mRNA /CNT=46 /TID=Mm.37850.1 /TIER=Stack /STK=13 /UG=Mm.37850 /LL=72597 /UG_GENE=2700063G02Rik /UG_TITLE=RIKEN cDNA 2700063G02 gene /DEF=Mus musculus 11 days embryo whole body cDNA, RIKEN full-length enriched library, clone:2700063G02:homolog to KIAA0442 PROTEIN (FRAGMENT), full insert sequence.	311.7	770.05	0.00420907	2.47048	Auts2
1450773_at	gb:BB051684 /DB_XREF=gi:16259596 /DB_XREF=BB051684 /CLONE=6720432J03 /FEA=FLmRNA /CNT=51 /TID=Mm.132309.1 /TIER=Stack /STK=9 /UG=Mm.132309 /LL=16508 /UG_GENE=Kcnd2 /UG_TITLE=potassium voltage-gated channel, Shal-related family, member 2 /FL=gb:AF107780.1 gb:NM_019697.1	1799.25	4435.3	0.000153158	2.46508	Kcnd2
1420384_at	gb:AK018103.1 /DB_XREF=gi:12857664 /FEA=FLmRNA /CNT=73 /TID=Mm.38108.1 /TIER=Stack /STK=14 /UG=Mm.38108 /LL=68018 /UG_GENE=Col4a3bp /UG_TITLE=collagen, type IV, alpha 3 (Goodpasture antigen) binding protein /DEF=Mus musculus adult male medulla oblongata cDNA, RIKEN full-length enriched library, clone:6330403E23:GOODPASTURE ANTIGEN-BINDING PROTEIN D26, full insert sequence. /FL=gb:BC016197.1 gb:AF…	488.3	1198.25	0.00132294	2.45392	Col4a3bp
1459488_at	gb:BM249225 /DB_XREF=gi:17884495 /DB_XREF=K0830B09-3 /CLONE=K0830B09 /FEA=EST /CNT=2 /TID=Mm.218124.1 /TIER=ConsEnd /STK=2 /UG=Mm.218124 /UG_TITLE=ESTs	28.65	70.3	0.0076769	2.45375	K0830B09-3
1434700_at	gb:BM123748 /DB_XREF=gi:17107516 /DB_XREF=L0529F09-3 /CLONE=L0529F09 /FEA=EST /CNT=91 /TID=Mm.31352.1 /TIER=Stack /STK=30 /UG=Mm.31352 /LL=104987 /UG_GENE=AW046379 /UG_TITLE=expressed sequence AW046379	82.8	200.8	0.000457493	2.42512	G2e3
1416779_at	gb:BE197945 /DB_XREF=gi:8710114 /DB_XREF=ug76h12.x1 /CLONE=IMAGE:1548359 /FEA=FLmRNA /CNT=150 /TID=Mm.220962.1 /TIER=Stack /STK=10 /UG=Mm.220962 /LL=20324 /UG_GENE=Sdpr /UG_TITLE=serum deprivation response /FL=gb:NM_138741.1 gb:BC027005.1 gb:BC020008.1	123.5	297.8	0.00482331	2.41134	Sdpr
1419069_at	gb:BB280137 /DB_XREF=gi:15411073 /DB_XREF=BB280137 /CLONE=A930023M04 /FEA=FLmRNA /CNT=53 /TID=Mm.101118.1 /TIER=Stack /STK=11 /UG=Mm.101118 /LL=56715 /UG_GENE=Rab5ef-pending /UG_TITLE=Rab5 exchange factor /FL=gb:AF093590.1 gb:BC018229.1 gb:NM_019983.1	285.55	687.85	0.00810979	2.40886	Rabgef1
1417270_at	gb:AK016611.1 /DB_XREF=gi:12855440 /GEN=Wdr12 /FEA=FLmRNA /CNT=115 /TID=Mm.87293.1 /TIER=ConsEnd /STK=1 /UG=Mm.87293 /LL=57750 /UG_TITLE=WD repeat domain 12 /DEF=Mus musculus adult male testis cDNA, RIKEN full-length enriched library, clone:4933402C23:WD repeat domain 12, full insert sequence. /FL=gb:BC004748.1 gb:AF239765.1 gb:NM_021312.1 gb:AY059431.1	103.6	249.3	0.0084867	2.40637	Wdr12
1445499_at	gb:BI986319 /DB_XREF=gi:17957267 /DB_XREF=3164-03 /FEA=EST /CNT=3 /TID=Mm.45578.1 /TIER=ConsEnd /STK=2 /UG=Mm.45578 /UG_TITLE=ESTs, Weakly similar to A55817 cyclin-dependent kinase p130-PITSLRE - mouse (M.musculus)	164.9	396.8	0.00591868	2.40631	Zc3h13
1436985_at	gb:BM115349 /DB_XREF=gi:17078367 /DB_XREF=L0819A02-3 /CLONE=L0819A02 /FEA=EST /CNT=43 /TID=Mm.41468.1 /TIER=Stack /STK=31 /UG=Mm.41468 /UG_TITLE=ESTs, Moderately similar to hypothetical protein FLJ13964 (Homo sapiens) (H.sapiens)	828.3	1991.75	0.00636719	2.40462	Zfp644
1452631_at	gb:AI852705 /DB_XREF=gi:5496611 /DB_XREF=UI-M-BH0-aji-e-08-0-UI.s1 /CLONE=UI-M-BH0-aji-e-08-0-UI /FEA=mRNA /CNT=21 /TID=Mm.219578.1 /TIER=Stack /STK=8 /UG=Mm.219578 /LL=70432 /UG_GENE=2610111M19Rik /UG_TITLE=RIKEN cDNA 2610111M19 gene	76.3	183.4	0.000156957	2.40367	Rufy2
1416482_at	gb:BQ257627 /DB_XREF=gi:20458380 /DB_XREF=NISC_kp04c07.q2 /CLONE=IMAGE:5408269 /FEA=FLmRNA /CNT=416 /TID=Mm.3679.1 /TIER=Stack /STK=9 /UG=Mm.3679 /LL=22129 /UG_GENE=Ttc3 /UG_TITLE=tetratricopeptide repeat domain /FL=gb:NM_009441.1 gb:AB008516.1	541.5	1295.65	0.0030373	2.39271	Ttc3
1436519_a_at	gb:BB534387 /DB_XREF=gi:16446385 /DB_XREF=BB534387 /CLONE=E030036E20 /FEA=EST /CNT=27 /TID=Mm.25608.2 /TIER=Stack /STK=8 /UG=Mm.25608 /LL=68832 /UG_GENE=1110057K04Rik /UG_TITLE=RIKEN cDNA 1110057K04 gene	707	1691.55	0.000796048	2.39257	1110057K04Rik
1425861_x_at	gb:BB629558 /DB_XREF=gi:16466709 /DB_XREF=BB629558 /CLONE=9830141H23 /FEA=FLmRNA /CNT=6 /TID=Mm.30841.3 /TIER=ConsEnd /STK=0 /UG=Mm.30841 /LL=12293 /UG_GENE=Cacna2d1 /UG_TITLE=calcium channel, voltage-dependent, alpha2delta subunit 1 /FL=gb:U73483.1	98.05	234.5	0.00551963	2.39164	Cacna2d1
1439067_at	gb:BB667693 /DB_XREF=gi:16399142 /DB_XREF=BB667693 /CLONE=C730033L13 /FEA=EST /CNT=17 /TID=Mm.36394.1 /TIER=Stack /STK=8 /UG=Mm.36394 /LL=52855 /UG_GENE=D7Bwg0421e /UG_TITLE=DNA segment, Chr 7, Brigham & Womens Genetics 0421 expressed	56.85	135.8	0.00315421	2.38874	Lair1
1456419_at	gb:BI108098 /DB_XREF=gi:14558991 /DB_XREF=602902496F1 /CLONE=IMAGE:5032198 /FEA=EST /CNT=41 /TID=Mm.86860.2 /TIER=Stack /STK=10 /UG=Mm.86860 /LL=70591 /UG_GENE=5730455P16Rik /UG_TITLE=RIKEN cDNA 5730455P16 gene	847.45	2020.8	0.00670559	2.38457	5730455P16Rik
1426371_at	gb:AK014486.1 /DB_XREF=gi:12852374 /FEA=FLmRNA /CNT=216 /TID=Mm.147529.1 /TIER=Stack /STK=18 /UG=Mm.147529 /LL=67420 /UG_GENE=3732409C05Rik /UG_TITLE=RIKEN cDNA 3732409C05 gene /DEF=Mus musculus 14 days embryo liver cDNA, RIKEN full-length enriched library, clone:4432411H12:related to MALE STERILITY PROTEIN 2-LIKE PROTEIN, full insert sequence. /FL=gb:BC007178.1	656.15	1564.35	0.00490964	2.38413	Far1
1425274_at	gb:AF221854.1 /DB_XREF=gi:12655824 /FEA=FLmRNA /CNT=16 /TID=Mm.3088.2 /TIER=FL /STK=3 /UG=Mm.3088 /LL=65973 /UG_GENE=Asph /DEF=Mus musculus cardiac junctin mRNA, complete cds. /PROD=cardiac junctin /FL=gb:AF289490.1 gb:AF221854.1	162	385.85	0.00745075	2.38179	Asph
1431717_at	gb:AK014386.1 /DB_XREF=gi:12852200 /FEA=mRNA /CNT=2 /TID=Mm.54484.1 /TIER=ConsEnd /STK=0 /UG=Mm.54484 /LL=70774 /UG_GENE=3526401B18Rik /UG_TITLE=RIKEN cDNA 3526401B18 gene /DEF=Mus musculus adult male brain cDNA, RIKEN full-length enriched library, clone:3526401B18:unclassifiable, full insert sequence.	154.8	368.25	0.00488108	2.37888	Akap5
1447763_at	gb:AV160090 /DB_XREF=gi:5403725 /DB_XREF=AV160090 /CLONE=3010040M24 /FEA=EST /CNT=2 /TID=Mm.45283.1 /TIER=ConsEnd /STK=2 /UG=Mm.45283 /UG_TITLE=ESTs	468.15	1113.6	0.00018099	2.37872	Snap25
1425156_at	gb:BC010229.1 /DB_XREF=gi:16307375 /FEA=FLmRNA /CNT=21 /TID=Mm.45740.1 /TIER=FL /STK=5 /UG=Mm.45740 /DEF=Mus musculus, Similar to guanylate nucleotide binding protein 3, clone MGC:6385 IMAGE:3501441, mRNA, complete cds. /PROD=Similar to guanylate nucleotide binding protein3 /FL=gb:BC010229.1	60.75	144.5	0.00542221	2.3786	Gbp7
1429505_at	gb:BB357130 /DB_XREF=gi:9068958 /DB_XREF=BB357130 /CLONE=C030019A13 /FEA=mRNA /CNT=58 /TID=Mm.38133.1 /TIER=Stack /STK=17 /UG=Mm.38133 /LL=71938 /UG_GENE=2310076G13Rik /UG_TITLE=RIKEN cDNA 2310076G13 gene	262.75	624.4	0.000409277	2.3764	BB357130
1437638_at	gb:BB821417 /DB_XREF=gi:16994046 /DB_XREF=BB821417 /CLONE=G830011L04 /FEA=EST /CNT=25 /TID=Mm.133707.1 /TIER=Stack /STK=15 /UG=Mm.133707 /LL=106491 /UG_GENE=AA410130 /UG_TITLE=expressed sequence AA410130	41.95	99.65	0.00474959	2.37545	Srrm2
1417697_at	gb:BG064396 /DB_XREF=gi:12546959 /DB_XREF=H3019B03-3 /CLONE=H3019B03 /FEA=FLmRNA /CNT=110 /TID=Mm.28099.1 /TIER=Stack /STK=26 /UG=Mm.28099 /LL=20652 /UG_GENE=Soat1 /UG_TITLE=sterol O-acyltransferase 1 /FL=gb:NM_009230.1 gb:L42293.1	132.55	314.65	0.00887168	2.37382	Soat1
1437120_at	gb:BB320376 /DB_XREF=gi:16403306 /DB_XREF=BB320376 /CLONE=B230385I08 /FEA=EST /CNT=36 /TID=Mm.29971.2 /TIER=Stack /STK=25 /UG=Mm.29971 /LL=67804 /UG_GENE=Snx2 /UG_TITLE=sorting nexin 2	283.55	672.7	0.00763816	2.37242	Snx2
1452497_a_at	gb:U28807.1 /DB_XREF=gi:1244445 /FEA=mRNA /CNT=2 /TID=Mm.3107.2 /TIER=ConsEnd /STK=0 /UG=Mm.3107 /LL=18021 /UG_GENE=Nfatc3 /DEF=Mus musculus lymphoid-specific transcription factor NFATc3 mRNA, partial cds. /PROD=NFATc3	78.55	186.25	0.000615461	2.3711	NFATc3
1424077_at	gb:AK016023.1 /DB_XREF=gi:12854600 /FEA=FLmRNA /CNT=145 /TID=Mm.7775.1 /TIER=Stack /STK=38 /UG=Mm.7775 /LL=66569 /UG_GENE=2610020H15Rik /UG_TITLE=RIKEN cDNA 2610020H15 gene /DEF=Mus musculus adult male testis cDNA, RIKEN full-length enriched library, clone:4930542N03:homolog to CDNA: FLJ22603 FIS, CLONE HSI04564 (UNKNOWN) (PROTEIN FOR MGC:4171), full insert sequence. /FL=gb:BC016541.1	748.35	1774.3	0.000309988	2.37095	Gdpd1
1450368_a_at	gb:NM_024459.1 /DB_XREF=gi:13277369 /GEN=Ppp3r1 /FEA=FLmRNA /CNT=2 /TID=Mm.41840.1 /TIER=FL /STK=2 /UG=Mm.41840 /LL=19058 /DEF=Mus musculus protein phospatase 3, regulatory subunit B, alpha isoform (calcineurin B, type I) (Ppp3r1), mRNA. /PROD=protein phospatase 3, regulatory subunit B,alpha isoform (calcineurin B, type I) /FL=gb:NM_024459.1 gb:BC002267.1	199.6	473.2	0.00710414	2.37074	Cnb1
1419389_at	gb:NM_011866.1 /DB_XREF=gi:6755005 /GEN=Pde10a /FEA=FLmRNA /CNT=25 /TID=Mm.40124.1 /TIER=FL+Stack /STK=10 /UG=Mm.40124 /LL=23984 /DEF=Mus musculus phosphodiesterase 10A (Pde10a), mRNA. /PROD=phosphodiesterase 10A /FL=gb:NM_011866.1 gb:AF110507.1	216.9	514.05	0.00256667	2.36999	Pde10a
1424755_at	gb:BC017516.1 /DB_XREF=gi:17028403 /FEA=FLmRNA /CNT=56 /TID=Mm.50610.1 /TIER=FL+Stack /STK=17 /UG=Mm.50610 /DEF=Mus musculus, Similar to huntingtin interacting protein 1, clone MGC:27616 IMAGE:4504441, mRNA, complete cds. /PROD=Similar to huntingtin interacting protein 1 /FL=gb:BC017516.1	79.4	187.95	0.000573438	2.36713	Hip1
1436983_at	gb:BG069466 /DB_XREF=gi:12551947 /DB_XREF=H3075G02-3 /CLONE=H3075G02 /FEA=EST /CNT=54 /TID=Mm.27963.1 /TIER=Stack /STK=31 /UG=Mm.27963 /UG_TITLE=ESTs, Highly similar to CBP MOUSE CREB-BINDING PROTEIN (M.musculus)	753.4	1779.35	0.00610391	2.36176	Crebbp
1457625_s_at	gb:BE979937 /DB_XREF=gi:10647372 /DB_XREF=UI-M-BG2-bcp-b-09-0-UI.s1 /CLONE=UI-M-BG2-bcp-b-09-0-UI /FEA=EST /CNT=4 /TID=Mm.44963.1 /TIER=ConsEnd /STK=4 /UG=Mm.44963 /UG_TITLE=ESTs, Weakly similar to S22745 serinethreonine protein kinase KKIALRE (H.sapiens)	62.2	146.75	0.00585858	2.35932	Cdkl2
1439075_at	gb:AI931937 /DB_XREF=gi:5668422 /DB_XREF=ul68b04.x1 /CLONE=IMAGE:2135695 /FEA=EST /CNT=32 /TID=Mm.196826.2 /TIER=Stack /STK=8 /UG=Mm.196826 /UG_TITLE=Mus musculus, clone MGC:11656 IMAGE:3602180, mRNA, complete cds	354.9	836.95	0.000864307	2.35827	Polr3f
1450071_at	gb:NM_138679.1 /DB_XREF=gi:20149771 /GEN=LOC192195 /FEA=FLmRNA /CNT=123 /TID=Mm.24637.1 /TIER=FL /STK=2 /UG=Mm.24637 /LL=192195 /DEF=Mus musculus putative chromatin remodeling factor (LOC192195), mRNA. /PROD=putative chromatin remodeling factor /FL=gb:NM_138679.1 gb:AF247132.1	837.65	1972.9	0.000465663	2.35528	Ash1l
1425687_at	gb:BE284491 /DB_XREF=gi:9161467 /DB_XREF=601087844F1 /CLONE=IMAGE:3482554 /FEA=FLmRNA /CNT=18 /TID=Mm.1993.2 /TIER=ConsEnd /STK=0 /UG=Mm.1993 /LL=12633 /UG_GENE=Cflar /UG_TITLE=CASP8 and FADD-like apoptosis regulator /FL=gb:U97076.1	36.95	86.95	0.00818078	2.35318	Cflar
1454950_at	gb:BB699417 /DB_XREF=gi:16048241 /DB_XREF=BB699417 /CLONE=7420411K10 /FEA=EST /CNT=279 /TID=Mm.148313.1 /TIER=Stack /STK=50 /UG=Mm.148313 /UG_TITLE=ESTs, Highly similar to KIAA0280 (H.sapiens)	131.25	308	0.00564543	2.34667	Fam168a
1437372_at	gb:BB335087 /DB_XREF=gi:15411581 /DB_XREF=BB335087 /CLONE=B830031K20 /FEA=EST /CNT=22 /TID=Mm.132502.1 /TIER=Stack /STK=19 /UG=Mm.132502 /UG_TITLE=ESTs, Weakly similar to S57447 HPBRII-7 protein (H.sapiens)	60.6	142.1	0.00707949	2.34488	Cpsf6
1442038_at	gb:AV134514 /DB_XREF=gi:5320244 /DB_XREF=AV134514 /CLONE=2810007O18 /FEA=EST /CNT=8 /TID=Mm.45704.1 /TIER=ConsEnd /STK=3 /UG=Mm.45704 /UG_TITLE=ESTs, Weakly similar to T15340 hypothetical protein B0336.3 - Caenorhabditis elegans (C.elegans)	119.6	280.2	0.00518222	2.34281	Rbm26
1437675_at	gb:BB522674 /DB_XREF=gi:16443708 /DB_XREF=BB522674 /CLONE=D930008O12 /FEA=EST /CNT=16 /TID=Mm.131102.1 /TIER=Stack /STK=15 /UG=Mm.131102 /UG_TITLE=ESTs	1486.9	3476.8	0.00177381	2.33829	Slc8a1
1424134_at	gb:BC010833.1 /DB_XREF=gi:15277429 /FEA=FLmRNA /CNT=162 /TID=Mm.109074.1 /TIER=FL+Stack /STK=51 /UG=Mm.109074 /LL=67610 /UG_GENE=4930470D19Rik /DEF=Mus musculus, clone MGC:19346 IMAGE:4235165, mRNA, complete cds. /PROD=Unknown (protein for MGC:19346) /FL=gb:BC010833.1	597.15	1396.3	0.00144725	2.33827	Rspry1
1459894_at	gb:BE631962 /DB_XREF=gi:9914650 /DB_XREF=uu56a04.y1 /CLONE=IMAGE:3375918 /FEA=EST /CNT=33 /TID=Mm.26486.1 /TIER=ConsEnd /STK=0 /UG=Mm.26486 /UG_TITLE=ESTs, Weakly similar to IQG1_MOUSE Ras GTPase-activating-like protein IQGAP1 (M.musculus)	439.45	1027.1	0.00408375	2.33724	Iqgap2
1431020_a_at	gb:AK008983.1 /DB_XREF=gi:12843500 /FEA=mRNA /CNT=20 /TID=Mm.27523.2 /TIER=ConsEnd /STK=0 /UG=Mm.27523 /LL=67529 /UG_GENE=1500031J01Rik /UG_TITLE=RIKEN cDNA 1500031J01 gene /DEF=Mus musculus adult male stomach cDNA, RIKEN full-length enriched library, clone:2210418M03:homolog to CDNA FLJ10672 FIS, CLONE NT2RP2006365, full insert sequence.	712.6	1660.4	0.00531425	2.33006	Fgfr1op2
1436533_at	gb:AV232359 /DB_XREF=gi:15405019 /DB_XREF=AV232359 /CLONE=4632414A09 /FEA=EST /CNT=58 /TID=Mm.40370.1 /TIER=Stack /STK=8 /UG=Mm.40370 /LL=69056 /UG_GENE=1810007I17Rik /UG_TITLE=RIKEN cDNA 1810007I17 gene	433.65	1010.4	0.00640591	2.32999	Trove2
1458464_at	gb:BB445169 /DB_XREF=gi:16424993 /DB_XREF=BB445169 /CLONE=D030049F17 /FEA=EST /CNT=6 /TID=Mm.212832.1 /TIER=ConsEnd /STK=2 /UG=Mm.212832 /UG_TITLE=ESTs, Weakly similar to NED4 MOUSE NEDD-4 PROTEIN (M.musculus)	135.9	316.05	0.00500655	2.32561	Hecw2
1434178_at	gb:BM238921 /DB_XREF=gi:17874191 /DB_XREF=K0525G01-3 /CLONE=K0525G01 /FEA=EST /CNT=122 /TID=Mm.24095.1 /TIER=Stack /STK=39 /UG=Mm.24095 /UG_TITLE=ESTs, Weakly similar to A48205 All-1 protein +GTE form - mouse (M.musculus)	1022.4	2377.6	0.00584428	2.32551	K0525G01-3
1453313_at	gb:AK017464.1 /DB_XREF=gi:12856710 /FEA=mRNA /CNT=36 /TID=Mm.44590.1 /TIER=ConsEnd /STK=6 /UG=Mm.44590 /LL=75747 /UG_GENE=5630400E15Rik /UG_TITLE=RIKEN cDNA 5630400E15 gene /DEF=Mus musculus 6 days embryo whole body cDNA, RIKEN full-length enriched library, clone:5630400E15:homolog to SESTRIN 1 (P53-REGULATED PROTEIN PA26), full insert sequence.	671	1559.5	0.00225379	2.32414	Sesn3
1418141_at	gb:BM115908 /DB_XREF=gi:17078926 /DB_XREF=L0827D09-3 /CLONE=L0827D09 /FEA=FLmRNA /CNT=90 /TID=Mm.12871.1 /TIER=Stack /STK=10 /UG=Mm.12871 /LL=13193 /UG_GENE=Dcx /UG_TITLE=doublecortin /FL=gb:AB011678.1 gb:AF045547.1 gb:NM_010025.1	186.2	431.95	0.000914167	2.31982	Dcx
1431066_at	gb:BB626220 /DB_XREF=gi:16464269 /DB_XREF=BB626220 /CLONE=9330166H09 /FEA=mRNA /CNT=25 /TID=Mm.219652.1 /TIER=ConsEnd /STK=0 /UG=Mm.219652 /LL=73068 /UG_GENE=3110009G03Rik /UG_TITLE=RIKEN cDNA 3110009G03 gene	79.25	182.8	0.00996477	2.30662	Fut11
1453125_at	gb:BM508495 /DB_XREF=gi:18679638 /DB_XREF=ii40b12.x1 /CLONE=IMAGE:5943911 /FEA=mRNA /CNT=91 /TID=Mm.41702.1 /TIER=Stack /STK=19 /UG=Mm.41702 /LL=67779 /UG_GENE=6230403H02Rik /UG_TITLE=RIKEN cDNA 6230403H02 gene	283.2	652.15	0.0010357	2.30279	Sox11
1422842_at	gb:C88269 /DB_XREF=gi:2920226 /DB_XREF=C88269 /CLONE=J0259D03 /FEA=FLmRNA /CNT=219 /TID=Mm.3065.1 /TIER=Stack /STK=17 /UG=Mm.3065 /LL=24128 /UG_GENE=Xrn2 /UG_TITLE=5-3 exoribonuclease 2 /FL=gb:BC004028.1 gb:NM_011917.1 gb:D38517.1	301.15	693.45	0.000690229	2.30267	Xrn2
1423560_at	gb:BE944434 /DB_XREF=gi:10522193 /DB_XREF=UI-M-BH3-awe-h-04-0-UI.s2 /CLONE=UI-M-BH3-awe-h-04-0-UI /FEA=FLmRNA /CNT=41 /TID=Mm.3959.1 /TIER=Stack /STK=11 /UG=Mm.3959 /LL=54003 /UG_GENE=Nell2 /UG_TITLE=nel-like 2 homolog (chicken) /FL=gb:NM_016743.1 gb:U59230.1	985.25	2264.7	0.00122564	2.2986	Nell2
1453684_s_at	gb:AK005661.1 /DB_XREF=gi:12838351 /FEA=mRNA /CNT=3 /TID=Mm.221150.1 /TIER=ConsEnd /STK=1 /UG=Mm.221150 /LL=69292 /UG_GENE=1700006A17Rik /UG_TITLE=RIKEN cDNA 1700006A17 gene /DEF=Mus musculus adult male testis cDNA, RIKEN full-length enriched library, clone:1700006A17:homolog to HSPC303 (FRAGMENT), full insert sequence.	1487.45	3418.5	0.00104724	2.29823	Zc3h15
1429521_at	gb:BM239958 /DB_XREF=gi:17875228 /DB_XREF=K0543A09-3 /CLONE=K0543A09 /FEA=mRNA /CNT=31 /TID=Mm.65678.1 /TIER=Stack /STK=16 /UG=Mm.65678 /LL=67667 /UG_GENE=4930562C03Rik /UG_TITLE=RIKEN cDNA 4930562C03 gene	741.95	1701.35	0.00507258	2.29308	Alkbh8
1425176_at	gb:BC024634.1 /DB_XREF=gi:19353132 /FEA=FLmRNA /CNT=96 /TID=Mm.81159.1 /TIER=FL /STK=2 /UG=Mm.81159 /LL=68921 /UG_GENE=1110065A22Rik /DEF=Mus musculus, clone MGC:25969 IMAGE:4240136, mRNA, complete cds. /PROD=Unknown (protein for MGC:25969) /FL=gb:BC024634.1 gb:AB044560.1	478.95	1097.6	0.00272206	2.29168	C1ql3
1430442_at	gb:AK018149.1 /DB_XREF=gi:12857734 /FEA=mRNA /CNT=5 /TID=Mm.158438.1 /TIER=ConsEnd /STK=2 /UG=Mm.158438 /LL=70729 /UG_GENE=6330408P19Rik /UG_TITLE=RIKEN cDNA 6330408P19 gene /DEF=Mus musculus adult male medulla oblongata cDNA, RIKEN full-length enriched library, clone:6330408P19:homolog to CARBOXYL-TERMINAL PDZ LIGAND OF NEURONAL NITRIC OXIDE SYNTHASE, full insert sequence.	213.3	488.5	0.00812451	2.2902	Nos1ap
1429624_at	gb:BG068009 /DB_XREF=gi:12550578 /DB_XREF=H3060G05-3 /CLONE=H3060G05 /FEA=mRNA /CNT=38 /TID=Mm.218566.1 /TIER=Stack /STK=12 /UG=Mm.218566 /LL=66660 /UG_GENE=5730555F13Rik /UG_TITLE=RIKEN cDNA 5730555F13 gene	346.6	793.7	0.00314905	2.28996	Sltm
1426114_at	gb:L36663.1 /DB_XREF=gi:840647 /FEA=FLmRNA /CNT=1 /TID=MmAffx.1.19 /TIER=FL /STK=1 /NOTE=sequence(s) not in UniGene /DEF=Mus musculus CArG box-binding factor mRNA, complete cds. /PROD=CArG box-binding factor /FL=gb:L36663.1	2549.95	5837.95	0.000133588	2.28944	Hnrnpab
1439767_at	gb:BB130159 /DB_XREF=gi:8784549 /DB_XREF=BB130159 /CLONE=9630044C18 /FEA=EST /CNT=7 /TID=Mm.132532.1 /TIER=ConsEnd /STK=7 /UG=Mm.132532 /UG_TITLE=ESTs, Moderately similar to PSD-95SAP90-associated protein-2 (R.norvegicus)	284.7	651.6	0.00219088	2.28872	Dlgap2
1440966_at	gb:BB248730 /DB_XREF=gi:15410618 /DB_XREF=BB248730 /CLONE=A730027L19 /FEA=EST /CNT=10 /TID=Mm.172435.1 /TIER=ConsEnd /STK=4 /UG=Mm.172435 /UG_TITLE=ESTs	94.7	215.75	0.00723401	2.27825	March7
1437548_at	gb:AV367839 /DB_XREF=gi:16397715 /DB_XREF=AV367839 /CLONE=8430438G19 /FEA=EST /CNT=28 /TID=Mm.132482.3 /TIER=Stack /STK=16 /UG=Mm.132482 /LL=12121 /UG_GENE=Bicd1 /UG_TITLE=bicaudal D homolog 1 (Drosophila)	298.65	680.3	0.0064851	2.27792	Bicd1
1431465_s_at	gb:AK008130.1 /DB_XREF=gi:12842123 /FEA=mRNA /CNT=4 /TID=Mm.195995.1 /TIER=ConsEnd /STK=3 /UG=Mm.195995 /LL=69823 /UG_GENE=2010005M05Rik /UG_TITLE=RIKEN cDNA 2010005M05 gene /DEF=Mus musculus adult male small intestine cDNA, RIKEN full-length enriched library, clone:2010005M05:hypothetical protein, full insert sequence.	89.1	202.95	0.0034293	2.27778	Fyttd1
1443923_at	gb:BB011550 /DB_XREF=gi:8134029 /DB_XREF=BB011550 /CLONE=4831445M16 /FEA=EST /CNT=8 /TID=Mm.142922.1 /TIER=ConsEnd /STK=2 /UG=Mm.142922 /UG_TITLE=ESTs, Moderately similar to A42915 type II cAMP-dependent protein kinase RII anchoring protein (H.sapiens)	68.15	155.1	0.00546417	2.27586	BB011550
1456359_at	gb:AV233215 /DB_XREF=gi:15405045 /DB_XREF=AV233215 /CLONE=4632422M10 /FEA=EST /CNT=12 /TID=Mm.98910.1 /TIER=Stack /STK=11 /UG=Mm.98910 /UG_TITLE=ESTs	106.8	243	0.00846884	2.27528	Ppwd1
1437082_at	gb:BB246410 /DB_XREF=gi:16355474 /DB_XREF=BB246410 /CLONE=A730014G18 /FEA=EST /CNT=46 /TID=Mm.46044.2 /TIER=Stack /STK=26 /UG=Mm.46044 /LL=97235 /UG_GENE=C79026 /UG_TITLE=expressed sequence C79026	163	370.15	0.00189637	2.27086	Akap9
1459619_at	gb:BB254042 /DB_XREF=gi:15410692 /DB_XREF=BB254042 /CLONE=A730060B10 /FEA=EST /CNT=2 /TID=Mm.208328.1 /TIER=ConsEnd /STK=2 /UG=Mm.208328 /UG_TITLE=ESTs	107.9	244.5	0.0043261	2.26599	Epb4.1l2
1437545_at	gb:BM194994 /DB_XREF=gi:17746264 /DB_XREF=L0704D04-3 /CLONE=L0704D04 /FEA=EST /CNT=37 /TID=Mm.34374.2 /TIER=Stack /STK=16 /UG=Mm.34374 /LL=66473 /UG_GENE=2200008D09Rik /UG_TITLE=RIKEN cDNA 2200008D09 gene	360.1	815.85	0.00309674	2.26562	Rcor1
1437633_at	gb:BE333865 /DB_XREF=gi:9207641 /DB_XREF=us28c03.y1 /CLONE=IMAGE:3168388 /FEA=EST /CNT=93 /TID=Mm.41929.2 /TIER=Stack /STK=12 /UG=Mm.41929 /UG_TITLE=ESTs, Moderately similar to AF121775 1 nasopharyngeal carcinoma susceptibility protein LZ16 (H.sapiens)	537.85	1218.35	0.00915086	2.26522	Ankrd11
1450738_at	gb:NM_016705.1 /DB_XREF=gi:7710045 /GEN=Kif21a /FEA=FLmRNA /CNT=82 /TID=Mm.41379.1 /TIER=FL+Stack /STK=14 /UG=Mm.41379 /LL=16564 /DEF=Mus musculus kinesin family member 21A (Kif21a), mRNA. /PROD=kinesin family member 21A /FL=gb:NM_016705.1 gb:AF202892.1	2668.1	6021.65	0.00617548	2.25691	Kif21a
1460448_s_at	gb:BM238672 /DB_XREF=gi:17873942 /DB_XREF=K0521E04-3 /CLONE=K0521E04 /FEA=mRNA /CNT=100 /TID=Mm.87673.1 /TIER=Stack /STK=25 /UG=Mm.87673 /LL=70953 /UG_GENE=4931403I22Rik /UG_TITLE=RIKEN cDNA 4931403I22 gene	54.6	123	0.00264205	2.25275	Ttc14
1427831_s_at	gb:L36316.1 /DB_XREF=gi:538414 /GEN=Zfp /FEA=mRNA /CNT=1 /TID=Mm.195092.1 /TIER=ConsEnd /STK=0 /UG=Mm.195092 /LL=22721 /DEF=Mus musculus (clone PMLZ2) zinc finger protein (Zfp) mRNA, 3 end of cds. /PROD=zinc finger protein	403.95	909.3	0.00720834	2.25102	Zfp
1443867_at	gb:BB320633 /DB_XREF=gi:16403321 /DB_XREF=BB320633 /CLONE=B230387C07 /FEA=EST /CNT=13 /TID=Mm.157775.1 /TIER=ConsEnd /STK=2 /UG=Mm.157775 /UG_TITLE=ESTs, Weakly similar to S47354 ribosomal protein L18a homolog (H.sapiens)	218.7	492.15	0.00332385	2.25034	BB320633
1423331_a_at	gb:BG070704 /DB_XREF=gi:12553273 /DB_XREF=H3090C02-3 /CLONE=H3090C02 /FEA=FLmRNA /CNT=26 /TID=Mm.46724.3 /TIER=Stack /STK=15 /UG=Mm.46724 /LL=58998 /UG_GENE=Pvrl3 /UG_TITLE=poliovirus receptor-related 3 /FL=gb:NM_021497.1 gb:AF195835.1	591.95	1329.75	0.00972472	2.24639	Pvrl3
1447580_at	gb:AI835197 /DB_XREF=gi:5469410 /DB_XREF=UI-M-AQ0-aaa-b-12-0-UI.s1 /CLONE=UI-M-AQ0-aaa-b-12-0-UI /FEA=EST /CNT=2 /TID=Mm.218356.1 /TIER=ConsEnd /STK=2 /UG=Mm.218356 /UG_TITLE=ESTs	73.55	165.05	0.00129019	2.24405	UI-M-AQ0-aaa-b-12-0-UI.s1
1453956_a_at	gb:AK016370.1 /DB_XREF=gi:12855071 /GEN=Pftk1 /FEA=mRNA /CNT=2 /TID=Mm.6456.3 /TIER=ConsEnd /STK=1 /UG=Mm.6456 /LL=18647 /UG_TITLE=PFTAIRE protein kinase 1 /DEF=Mus musculus adult male testis cDNA, RIKEN full-length enriched library, clone:4930588P12:PFTAIRE protein kinase 1, full insert sequence.	118.6	264.7	0.00332857	2.23187	Pftk1
1456256_at	gb:BM242785 /DB_XREF=gi:17878055 /DB_XREF=K0637E05-3 /CLONE=K0637E05 /FEA=EST /CNT=21 /TID=Mm.116885.1 /TIER=Stack /STK=12 /UG=Mm.116885 /UG_TITLE=ESTs, Highly similar to EUKARYOTIC TRANSLATION INITIATION FACTOR 5 (R.norvegicus)	421.8	940.3	0.000721122	2.22926	Eif5
1428418_s_at	gb:BE198251 /DB_XREF=gi:8710420 /DB_XREF=ug76d11.y1 /CLONE=IMAGE:1548309 /FEA=mRNA /CNT=103 /TID=Mm.28860.1 /TIER=Stack /STK=16 /UG=Mm.28860 /LL=67306 /UG_GENE=3110050N22Rik /UG_TITLE=RIKEN cDNA 3110050N22 gene	1105.2	2463.75	0.0020757	2.22923	Zc2hc1a
1434643_at	gb:BB025726 /DB_XREF=gi:15403466 /DB_XREF=BB025726 /CLONE=5330429M20 /FEA=EST /CNT=198 /TID=Mm.21158.2 /TIER=Stack /STK=13 /UG=Mm.21158 /LL=56717 /UG_GENE=Frap1 /UG_TITLE=FK506 binding protein 12-rapamycin associated protein 1	387.25	860.55	0.00153293	2.22221	Frap1
1448673_at	gb:NM_021495.1 /DB_XREF=gi:12957491 /GEN=Pvrl3 /FEA=FLmRNA /CNT=127 /TID=Mm.46724.1 /TIER=FL+Stack /STK=48 /UG=Mm.46724 /LL=58998 /DEF=Mus musculus poliovirus receptor-related 3 (Pvrl3), mRNA. /PROD=nectin-3 alpha /FL=gb:AF195833.1 gb:NM_021495.1	843.95	1870.95	0.00342843	2.2169	Pvrl3
1416211_a_at	gb:BF178348 /DB_XREF=gi:11056490 /DB_XREF=601808588F1 /CLONE=IMAGE:4039533 /FEA=FLmRNA /CNT=242 /TID=Mm.3063.1 /TIER=Stack /STK=8 /UG=Mm.3063 /LL=19242 /UG_GENE=Ptn /UG_TITLE=pleiotrophin /FL=gb:NM_008973.1 gb:BC002064.1	2009.9	4455.25	0.000248372	2.21665	Ptn
1426301_at	gb:BF583242 /DB_XREF=gi:11656960 /DB_XREF=602101703F1 /CLONE=IMAGE:4224768 /FEA=FLmRNA /CNT=60 /TID=Mm.2877.1 /TIER=ConsEnd /STK=0 /UG=Mm.2877 /LL=11658 /UG_GENE=Alcam /UG_TITLE=activated leukocyte cell adhesion molecule /FL=gb:U95030.1 gb:BC027280.1	1277.15	2823.15	0.00157756	2.21051	Alcam
1455836_at	gb:BM230222 /DB_XREF=gi:17793394 /DB_XREF=K0292A09-3 /CLONE=K0292A09 /FEA=EST /CNT=109 /TID=Mm.3170.4 /TIER=Stack /STK=40 /UG=Mm.3170 /LL=18789 /UG_GENE=Papola /UG_TITLE=poly (A) polymerase alpha	240	529.85	0.0052284	2.20771	Papola
1449250_at	gb:NM_033573.1 /DB_XREF=gi:15809011 /GEN=Prcc /FEA=FLmRNA /CNT=32 /TID=Mm.35089.1 /TIER=FL+Stack /STK=17 /UG=Mm.35089 /LL=94315 /DEF=Mus musculus papillary renal cell carcinoma (translocation-associated) (Prcc), mRNA. /PROD=papillary renal cell carcinoma(translocation-associated) /FL=gb:AF273750.1 gb:NM_033573.1	175.35	385.8	0.00716167	2.20017	Prcc
1420973_at	gb:BB699910 /DB_XREF=gi:16048734 /DB_XREF=BB699910 /CLONE=7420416H04 /FEA=FLmRNA /CNT=54 /TID=Mm.46544.1 /TIER=Stack /STK=25 /UG=Mm.46544 /LL=71371 /UG_GENE=Desrt /UG_TITLE=developmentally and sexually retarded with transient immune abnormalities /FL=gb:NM_023598.1 gb:AF169968.1	87.55	192.6	0.00850391	2.19989	Desrt
1427253_s_at	gb:BG066534 /DB_XREF=gi:12549191 /DB_XREF=H3045A10-3 /CLONE=H3045A10 /FEA=mRNA /CNT=207 /TID=Mm.21964.1 /TIER=Stack /STK=23 /UG=Mm.21964 /UG_TITLE=Mus musculus, clone IMAGE:3485208, mRNA, partial cds	620.65	1364	0.000215062	2.1977	Suz12
1423433_at	gb:BG069917 /DB_XREF=gi:12552486 /DB_XREF=H3081E07-3 /CLONE=H3081E07 /FEA=FLmRNA /CNT=65 /TID=Mm.35793.1 /TIER=Stack /STK=28 /UG=Mm.35793 /LL=20822 /UG_GENE=Ssa2 /UG_TITLE=Sjogren syndrome antigen A2 /FL=gb:L81154.1 gb:U66843.1 gb:NM_013835.1	421.25	925.25	0.00693559	2.19644	Ssa2
1424768_at	gb:BC019435.1 /DB_XREF=gi:18043855 /FEA=FLmRNA /CNT=234 /TID=Mm.130433.1 /TIER=FL+Stack /STK=16 /UG=Mm.130433 /DEF=Mus musculus, Similar to Caldesmon 1, clone MGC:30319 IMAGE:5148205, mRNA, complete cds. /PROD=Similar to Caldesmon 1 /FL=gb:BC019435.1	238.75	524.35	0.00276614	2.19623	Cald1
1421906_at	gb:AF332074.1 /DB_XREF=gi:14193714 /GEN=Pparbp /FEA=FLmRNA /CNT=86 /TID=Mm.12926.2 /TIER=FL /STK=1 /UG=Mm.12926 /LL=19014 /DEF=Mus musculus strain ILS peroxisome proliferator-activated receptor binding protein (Pparbp) mRNA, complete cds. /PROD=peroxisome proliferator-activated receptorbinding protein /FL=gb:AF000294.1 gb:NM_013634.1 gb:AF332074.1 gb:AF332073.1	115.75	254.15	0.00741911	2.19568	Pparbp
1450193_at	gb:NM_010408.1 /DB_XREF=gi:6754167 /GEN=Hcn1 /FEA=FLmRNA /CNT=9 /TID=Mm.8010.1 /TIER=FL /STK=2 /UG=Mm.8010 /LL=15165 /DEF=Mus musculus hyperpolarization-activated, cyclic nucleotide-gated K+ 1 (Hcn1), mRNA. /PROD=hyperpolarization-activated, cyclicnucleotide-gated K+ 1 /FL=gb:NM_010408.1 gb:AF028737.1	883.75	1938.4	0.00949833	2.19338	Hcn1
1423198_a_at	gb:BB147131 /DB_XREF=gi:8802068 /DB_XREF=BB147131 /CLONE=9930038A08 /FEA=FLmRNA /CNT=263 /TID=Mm.197564.1 /TIER=Stack /STK=11 /UG=Mm.197564 /LL=104570 /UG_GENE=AW011752 /UG_TITLE=expressed sequence AW011752 /FL=gb:BC006870.1 gb:NM_134034.1	222.95	488.8	0.00249485	2.19242	Smek2
1450749_a_at	gb:NM_013613.1 /DB_XREF=gi:7305324 /GEN=Nr4a2 /FEA=FLmRNA /CNT=44 /TID=Mm.3507.1 /TIER=FL+Stack /STK=12 /UG=Mm.3507 /LL=18227 /DEF=Mus musculus nuclear receptor subfamily 4, group A, member 2 (Nr4a2), mRNA. /PROD=nuclear receptor subfamily 4, group A, member 2 /FL=gb:NM_013613.1	426.1	933.6	0.0054677	2.19103	Nr4a2
1456054_a_at	gb:BB314559 /DB_XREF=gi:9015264 /DB_XREF=BB314559 /CLONE=B230348A11 /FEA=EST /CNT=18 /TID=Mm.34701.2 /TIER=Stack /STK=18 /UG=Mm.34701 /LL=80912 /UG_GENE=Pum1 /UG_TITLE=pumilio 1 (Drosophila)	1739.5	3810.35	0.00155458	2.19049	Pum1
1440248_at	gb:BB238478 /DB_XREF=gi:8920932 /DB_XREF=BB238478 /CLONE=A630071M09 /FEA=EST /CNT=8 /TID=Mm.170955.1 /TIER=ConsEnd /STK=5 /UG=Mm.170955 /UG_TITLE=ESTs, Weakly similar to golgi membrane protein GP73 (H.sapiens)	55.05	120.45	0.00324003	2.18801	Casc4
1419894_at	gb:AI390493 /DB_XREF=gi:4216500 /DB_XREF=mu75e01.y1 /CLONE=IMAGE:651384 /FEA=EST /CNT=3 /TID=Mm.37656.1 /TIER=ConsEnd /STK=0 /UG=Mm.37656 /UG_TITLE=ESTs, Moderately similar to PSB7_MOUSE Proteasome subunit beta type 7 precursor (Proteasome suubunit Z) (Macropain chain Z) (Multicatalytic endopeptidase complex chain Z) (M.musculus)	54.3	118.8	0.00295271	2.18785	Gm6787
1417135_at	gb:BG805074 /DB_XREF=gi:17952002 /DB_XREF=0612-12 /FEA=FLmRNA /CNT=188 /TID=Mm.8709.1 /TIER=Stack /STK=35 /UG=Mm.8709 /LL=20817 /UG_GENE=Srpk2 /UG_TITLE=serinearginine-rich protein specific kinase 2 /FL=gb:AB006036.1 gb:BC020178.1 gb:NM_009274.1	1940.6	4242.4	0.00662772	2.18613	Srpk2
1419972_at	gb:C86506 /DB_XREF=gi:2918463 /DB_XREF=C86506 /CLONE=J0227H04 /FEA=EST /CNT=1 /TID=Mm.195368.1 /TIER=ConsEnd /STK=0 /UG=Mm.195368 /LL=52600 /UG_GENE=D16Ertd450e /UG_TITLE=DNA segment, Chr 16, ERATO Doi 450, expressed	96.6	210.95	0.00640094	2.18375	Slc35a5
1456498_at	gb:BB284583 /DB_XREF=gi:8985032 /DB_XREF=BB284583 /CLONE=A930106F08 /FEA=EST /CNT=20 /TID=Mm.122709.2 /TIER=Stack /STK=9 /UG=Mm.122709 /UG_TITLE=ESTs	178.25	387.8	0.00962875	2.1756	Itga4
1421881_a_at	gb:AY035380.1 /DB_XREF=gi:15020257 /FEA=FLmRNA /CNT=104 /TID=Mm.3823.1 /TIER=FL /STK=1 /UG=Mm.3823 /LL=15569 /UG_GENE=Elavl2 /DEF=Mus musculus ELAV-like neuronal protein-1 mRNA, complete cds, alternatively spliced. /PROD=ELAV-like neuronal protein-1 /FL=gb:U29088.1 gb:NM_010486.1 gb:AY035380.1	976.25	2123.5	0.00399743	2.17516	Elavl2
1452364_at	gb:BG066534 /DB_XREF=gi:12549191 /DB_XREF=H3045A10-3 /CLONE=H3045A10 /FEA=mRNA /CNT=207 /TID=Mm.21964.1 /TIER=Stack /STK=23 /UG=Mm.21964 /UG_TITLE=Mus musculus, clone IMAGE:3485208, mRNA, partial cds	347.7	755.95	0.00638416	2.17414	Suz12
1419641_at	gb:BE648479 /DB_XREF=gi:9974300 /DB_XREF=UI-M-BH2.1-apl-b-06-0-UI.r1 /CLONE=UI-M-BH2.1-apl-b-06-0-UI /FEA=FLmRNA /CNT=193 /TID=Mm.154651.1 /TIER=Stack /STK=10 /UG=Mm.154651 /LL=19291 /UG_GENE=Purb /UG_TITLE=purine rich element binding protein B /FL=gb:AF017630.1 gb:NM_011221.1	449.2	976.3	0.00280748	2.17342	Purb
1439005_x_at	gb:BG968903 /DB_XREF=gi:14356540 /DB_XREF=602836072F1 /CLONE=IMAGE:4990697 /FEA=EST /CNT=48 /TID=Mm.3360.7 /TIER=ConsEnd /STK=0 /UG=Mm.3360 /LL=22631 /UG_GENE=Ywhaz /UG_TITLE=tyrosine 3-monooxygenasetryptophan 5-monooxygenase activation protein, zeta polypeptide	677.65	1472.4	0.00470055	2.1728	Ywhaz
1415859_at	gb:BB858329 /DB_XREF=gi:17099783 /DB_XREF=BB858329 /CLONE=G370050E07 /FEA=FLmRNA /CNT=444 /TID=Mm.22776.1 /TIER=Stack /STK=14 /UG=Mm.22776 /LL=56347 /UG_GENE=Eif3s8 /UG_TITLE=eukaryotic translation initiation factor 3, subunit 8 (110 kDa) /FL=gb:BC025032.1 gb:BC024855.1 gb:U67328.1 gb:NM_019646.1	1229.25	2669.1	0.000580369	2.17132	Eif3c
1451730_at	gb:BC022935.1 /DB_XREF=gi:18605799 /FEA=FLmRNA /CNT=92 /TID=Mm.16650.1 /TIER=FL /STK=1 /UG=Mm.16650 /LL=22720 /UG_GENE=Zfp62 /DEF=Mus musculus, clone MGC:30580 IMAGE:3497847, mRNA, complete cds. /PROD=Unknown (protein for MGC:30580) /FL=gb:BC022935.1	168.7	366.25	0.00684896	2.17101	Zfp62
1422556_at	gb:BI645481 /DB_XREF=gi:15559489 /DB_XREF=603275445F1 /CLONE=IMAGE:5315819 /FEA=FLmRNA /CNT=125 /TID=Mm.202311.1 /TIER=Stack /STK=14 /UG=Mm.202311 /LL=14674 /UG_GENE=Gna13 /UG_TITLE=guanine nucleotide binding protein, alpha 13 /FL=gb:M63660.1 gb:NM_010303.1	544.8	1181.5	0.00242677	2.16869	Gna13
1450146_at	gb:NM_019681.1 /DB_XREF=gi:9790114 /GEN=Freq /FEA=FLmRNA /CNT=15 /TID=Mm.41189.1 /TIER=FL /STK=2 /UG=Mm.41189 /LL=14299 /DEF=Mus musculus frequenin homolog (Drosophila) (Freq), mRNA. /PROD=frequenin homolog (Drosophila) /FL=gb:NM_019681.1 gb:AF020184.1	116.75	253.1	0.00272458	2.16788	Ncs1
1458534_at	gb:BB281929 /DB_XREF=gi:15411132 /DB_XREF=BB281929 /CLONE=A930034F15 /FEA=EST /CNT=5 /TID=Mm.44348.1 /TIER=ConsEnd /STK=2 /UG=Mm.44348 /UG_TITLE=ESTs	1314.4	2846.8	0.000238869	2.16585	Rgs7bp
1426322_a_at	gb:AY062429.1 /DB_XREF=gi:17644138 /FEA=FLmRNA /CNT=3 /TID=Mm.64790.1 /TIER=FL /STK=1 /UG=Mm.64790 /LL=72413 /UG_GENE=2700049B16Rik /DEF=Mus musculus large conductance calcium-activated K channel beta2 subunit mRNA, complete cds. /PROD=large conductance calcium-activated K channelbeta2 subunit /FL=gb:AY062429.1	142.9	308.25	0.000266567	2.1571	Kcnmb2
1418427_at	gb:NM_008448.1 /DB_XREF=gi:6680571 /GEN=Kif5b /FEA=FLmRNA /CNT=397 /TID=Mm.3380.1 /TIER=FL+Stack /STK=23 /UG=Mm.3380 /LL=16573 /DEF=Mus musculus kinesin family member 5B (Kif5b), mRNA. /PROD=kinesin family member 5B /FL=gb:NM_008448.1 gb:U86090.1	2737.1	5896.8	0.00277485	2.1544	Kif5b
1421534_at	gb:NM_008016.1 /DB_XREF=gi:6679796 /GEN=Fin15 /FEA=FLmRNA /CNT=5 /TID=Mm.3421.1 /TIER=FL /STK=2 /UG=Mm.3421 /LL=14210 /DEF=Mus musculus fibroblast growth factor inducible 15 (Fin15), mRNA. /PROD=fibroblast growth factor inducible 15 /FL=gb:NM_008016.1 gb:U42384.1	826.1	1779.7	0.00207413	2.15434	Mpp6
1458501_at	gb:BB371361 /DB_XREF=gi:16406963 /DB_XREF=BB371361 /CLONE=C130058I15 /FEA=EST /CNT=7 /TID=Mm.200227.1 /TIER=ConsEnd /STK=2 /UG=Mm.200227 /LL=97042 /UG_GENE=R75548 /UG_TITLE=expressed sequence R75548	763.9	1641.1	0.00051083	2.14832	Vapb
1447486_at	gb:BE991811 /DB_XREF=gi:10672002 /DB_XREF=UI-M-BZ1-bdz-f-12-0-UI.s1 /CLONE=UI-M-BZ1-bdz-f-12-0-UI /FEA=EST /CNT=2 /TID=Mm.152173.1 /TIER=ConsEnd /STK=2 /UG=Mm.152173 /UG_TITLE=ESTs, Highly similar to T03852 protein phosphatase 1 binding protein spinophilin - rat (R.norvegicus)	117.3	251.6	0.000746347	2.14493	UI-M-BZ1-bdz-f-12-0-UI.s1
1426300_at	gb:U95030.1 /DB_XREF=gi:2982191 /GEN=ALCAM /FEA=FLmRNA /CNT=60 /TID=Mm.2877.1 /TIER=FL+Stack /STK=10 /UG=Mm.2877 /LL=11658 /DEF=Mus musculus activated leukocyte cell adhesion molecule CD166 (ALCAM) mRNA, complete cds. /PROD=activated leukocyte cell adhesion moleculeCD166 /FL=gb:U95030.1 gb:BC027280.1	632.2	1351.8	0.00149624	2.13825	Alcam
1450308_a_at	gb:NM_011916.1 /DB_XREF=gi:6756024 /GEN=Xrn1 /FEA=FLmRNA /CNT=3 /TID=Mm.42050.1 /TIER=FL /STK=2 /UG=Mm.42050 /LL=24127 /DEF=Mus musculus 5-3 exoribonuclease 1 (Xrn1), mRNA. /PROD=5-3 exoribonuclease 1 /FL=gb:NM_011916.1 gb:D88026.1	136.6	292	0.00407344	2.13763	Xrn1
1433496_at	gb:AV122321 /DB_XREF=gi:15404466 /DB_XREF=AV122321 /CLONE=2610524C16 /FEA=EST /CNT=250 /TID=Mm.184314.1 /TIER=Stack /STK=51 /UG=Mm.184314 /UG_TITLE=ESTs, Weakly similar to procollagen-lysine 5-dioxygenase (R.norvegicus)	175.95	376	0.00793872	2.13697	Glt25d1
1426446_at	gb:BB282696 /DB_XREF=gi:15411162 /DB_XREF=BB282696 /CLONE=A930039K05 /FEA=FLmRNA /CNT=61 /TID=Mm.101958.1 /TIER=Stack /STK=10 /UG=Mm.101958 /UG_TITLE=Mus musculus, Similar to KIAA0513 gene product, clone MGC:38801 IMAGE:5359842, mRNA, complete cds /FL=gb:BC027126.1	785.15	1671.15	0.00392976	2.12845	6430548M08Rik
1429707_at	gb:AW208417 /DB_XREF=gi:6514411 /DB_XREF=uo60b02.x1 /CLONE=IMAGE:2646891 /FEA=mRNA /CNT=193 /TID=Mm.22724.2 /TIER=Stack /STK=9 /UG=Mm.22724 /LL=18786 /UG_GENE=Plaa /UG_TITLE=phospholipase A2, activating protein	828.35	1761.3	0.00625124	2.12628	Plaa
1420372_at	gb:AI893916 /DB_XREF=gi:5599818 /DB_XREF=mc42h06.y1 /CLONE=IMAGE:351227 /FEA=FLmRNA /CNT=65 /TID=Mm.30228.1 /TIER=Stack /STK=16 /UG=Mm.30228 /LL=20650 /UG_GENE=Sntb2 /UG_TITLE=syntrophin, basic 2 /FL=gb:NM_009229.1 gb:U00678.1	199.2	423.15	0.00342195	2.12425	Sntb2
1455388_at	gb:BB151391 /DB_XREF=gi:16267934 /DB_XREF=BB151391 /CLONE=A030012M09 /FEA=EST /CNT=127 /TID=Mm.21539.1 /TIER=Stack /STK=13 /UG=Mm.21539 /LL=28143 /UG_GENE=D1Ucla3 /UG_TITLE=DNA segment, Chr 1, University of California at Los Angeles 3	1358.2	2883.05	0.000614389	2.1227	Pcmtd1
1455886_at	gb:BB385581 /DB_XREF=gi:16408349 /DB_XREF=BB385581 /CLONE=C230039N22 /FEA=EST /CNT=35 /TID=Mm.8585.2 /TIER=Stack /STK=29 /UG=Mm.8585 /LL=12402 /UG_GENE=Cbl /UG_TITLE=Casitas B-lineage lymphoma	713.35	1512.5	0.00792982	2.12028	Cbl
1456398_at	gb:BB648848 /DB_XREF=gi:16483103 /DB_XREF=BB648848 /CLONE=C130040L09 /FEA=EST /CNT=19 /TID=Mm.18728.2 /TIER=Stack /STK=10 /UG=Mm.18728 /LL=103674 /UG_GENE=AI316828 /UG_TITLE=expressed sequence AI316828	363.55	770.75	0.00835587	2.12007	Tug1
1417355_at	gb:AB003040.1 /DB_XREF=gi:18958238 /GEN=Peg3 /FEA=FLmRNA /CNT=138 /TID=Mm.7952.1 /TIER=FL+Stack /STK=47 /UG=Mm.7952 /LL=18616 /DEF=Mus musculus Peg3 mRNA for zinc finger protein, complete cds. /PROD=zinc finger protein /FL=gb:AB003040.1 gb:AF038939.1 gb:NM_008817.1	2582.2	5473.8	0.00240722	2.11982	Peg3
1454067_a_at	gb:AK016432.1 /DB_XREF=gi:12855157 /FEA=mRNA /CNT=1 /TID=Mm.182227.2 /TIER=ConsEnd /STK=0 /UG=Mm.182227 /LL=70984 /UG_GENE=4931406C07Rik /UG_TITLE=RIKEN cDNA 4931406C07 gene /DEF=Mus musculus adult male testis cDNA, RIKEN full-length enriched library, clone:4931406C07:homolog to HYPOTHETICAL 35.1 KDA PROTEIN, full insert sequence.	267.7	566.45	0.00132376	2.11599	4931406C07Rik
1457985_at	gb:BE980727 /DB_XREF=gi:10649074 /DB_XREF=UI-M-BG2-bcm-d-03-0-UI.s1 /CLONE=UI-M-BG2-bcm-d-03-0-UI /FEA=EST /CNT=4 /TID=Mm.151181.1 /TIER=ConsEnd /STK=3 /UG=Mm.151181 /UG_TITLE=ESTs	81.1	171.45	0.00737282	2.11406	Clmn
1449030_at	gb:BM936504 /DB_XREF=gi:19395656 /DB_XREF=UI-M-BH3-arg-a-06-0-UI.r1 /CLONE=UI-M-BH3-arg-a-06-0-UI /FEA=FLmRNA /CNT=67 /TID=Mm.20892.1 /TIER=Stack /STK=25 /UG=Mm.20892 /LL=20965 /UG_GENE=Syn2 /UG_TITLE=synapsin II /FL=gb:NM_013681.1 gb:AF096867.1	3111.15	6562.95	0.00219637	2.10949	Syn2
1437303_at	gb:BI102913 /DB_XREF=gi:14553806 /DB_XREF=602888517F1 /CLONE=IMAGE:5043724 /FEA=EST /CNT=26 /TID=Mm.96748.1 /TIER=Stack /STK=20 /UG=Mm.96748 /UG_TITLE=ESTs	684.95	1444.85	0.00012277	2.10942	602888517F1
1434101_at	gb:BG921756 /DB_XREF=gi:14302232 /DB_XREF=602822707F1 /CLONE=IMAGE:4951848 /FEA=EST /CNT=270 /TID=Mm.34578.1 /TIER=Stack /STK=79 /UG=Mm.34578 /UG_TITLE=ESTs	592.95	1250.2	0.00672027	2.10844	Nfib
1434752_at	gb:BQ174259 /DB_XREF=gi:20349750 /DB_XREF=UI-M-DJ2-bvx-f-07-0-UI.s1 /CLONE=UI-M-DJ2-bvx-f-07-0-UI /FEA=EST /CNT=80 /TID=Mm.12236.3 /TIER=Stack /STK=25 /UG=Mm.12236 /LL=22680 /UG_GENE=Zfp207 /UG_TITLE=zinc finger protein 207	56.1	118.2	0.00707091	2.10695	Zfp207
1452161_at	gb:BB707122 /DB_XREF=gi:16055957 /DB_XREF=BB707122 /CLONE=7420497D14 /FEA=mRNA /CNT=248 /TID=Mm.21712.1 /TIER=Stack /STK=16 /UG=Mm.21712 /UG_TITLE=Mus musculus, clone IMAGE:3485144, mRNA	547.55	1152.6	0.00551389	2.10501	Tiparp
1438663_at	gb:BF730196 /DB_XREF=gi:12048060 /DB_XREF=mab60f05.x1 /CLONE=IMAGE:3974912 /FEA=EST /CNT=160 /TID=Mm.27489.1 /TIER=Stack /STK=9 /UG=Mm.27489 /UG_TITLE=ESTs, Moderately similar to T47182 hypothetical protein DKFZp434M1616.1 (H.sapiens)	771.45	1622.8	0.00697774	2.10357	mab60f05.x1
1426366_at	gb:AW553784 /DB_XREF=gi:7199207 /DB_XREF=L0231F05-3 /CLONE=L0231F05 /FEA=FLmRNA /CNT=78 /TID=Mm.26266.1 /TIER=Stack /STK=52 /UG=Mm.26266 /UG_TITLE=Mus musculus, eukaryotic translation initiation factor 2C, 2, clone MGC:38662 IMAGE:5356426, mRNA, complete cds /FL=gb:BC024857.1	829.6	1741.85	0.00485514	2.09963	Ago2
1436600_at	gb:BM119957 /DB_XREF=gi:17087983 /DB_XREF=L0933A10-3 /CLONE=L0933A10 /FEA=EST /CNT=11 /TID=Mm.127662.1 /TIER=Stack /STK=8 /UG=Mm.127662 /UG_TITLE=ESTs	642.35	1348.5	0.00045467	2.09932	Tox3
1435145_at	gb:BB333733 /DB_XREF=gi:16404020 /DB_XREF=BB333733 /CLONE=B830015A07 /FEA=EST /CNT=61 /TID=Mm.129786.1 /TIER=Stack /STK=19 /UG=Mm.129786 /UG_TITLE=ESTs, Weakly similar to Y269_HUMAN HYPOTHETICAL PROLINE-RICH PROTEIN KIAA0269 (H.sapiens)	765.95	1604	0.00183604	2.09413	BB333733
1435129_at	gb:AW495875 /DB_XREF=gi:7066156 /DB_XREF=up47g06.x1 /CLONE=IMAGE:2749306 /FEA=EST /CNT=20 /TID=Mm.6355.2 /TIER=Stack /STK=20 /UG=Mm.6355 /LL=19244 /UG_GENE=Ptp4a2 /UG_TITLE=protein tyrosine phosphatase 4a2	1992.65	4167.7	0.00623697	2.09154	Ptp4a2
1442918_at	gb:AW123147 /DB_XREF=gi:6098677 /DB_XREF=UI-M-BH2.1-apd-b-11-0-UI.s1 /CLONE=UI-M-BH2.1-apd-b-11-0-UI /FEA=EST /CNT=4 /TID=Mm.71029.1 /TIER=ConsEnd /STK=3 /UG=Mm.71029 /UG_TITLE=ESTs, Highly similar to KIAA0938 protein (H.sapiens)	149.1	311.7	0.000450472	2.09054	Nav3
1418760_at	gb:AK012056.1 /DB_XREF=gi:12848557 /GEN=Mdt1 /FEA=FLmRNA /CNT=173 /TID=Mm.219462.1 /TIER=Stack /STK=24 /UG=Mm.219462 /LL=17252 /UG_TITLE=cell line MC9.IL4 derived transcript 1 /DEF=Mus musculus 10 days embryo whole body cDNA, RIKEN full-length enriched library, clone:2610319N22:cell line MC9.IL4 derived transcript 1, full insert sequence. /FL=gb:BC018261.1 gb:AB035959.1 gb:AB030503.1 gb:AF474027.…	595.05	1240.9	0.00984743	2.08537	Rdh11
1416421_a_at	gb:BG796845 /DB_XREF=gi:14132415 /DB_XREF=UTSW_SM6A5 /CLONE=UTSW_SM6A5 /FEA=FLmRNA /CNT=172 /TID=Mm.10508.1 /TIER=Stack /STK=12 /UG=Mm.10508 /LL=20823 /UG_GENE=Ssb /UG_TITLE=Sjogren syndrome antigen B /FL=gb:L00993.1 gb:NM_009278.1 gb:BC003820.1	354	737.95	0.00205539	2.0846	Ssb
1449928_at	gb:NM_025975.2 /DB_XREF=gi:19923872 /GEN=2310075M16Rik /FEA=FLmRNA /CNT=208 /TID=Mm.29150.1 /TIER=FL /STK=3 /UG=Mm.29150 /LL=67117 /DEF=Mus musculus RIKEN cDNA 2310075M16 gene (2310075M16Rik), mRNA. /PROD=T-complex associated-testis-expressed 1-like /FL=gb:NM_025975.2	1085.5	2262.65	0.00111923	2.08443	Dynlt3
1425795_a_at	gb:D76446.1 /DB_XREF=gi:1167505 /FEA=FLmRNA /CNT=4 /TID=Mm.3968.1 /TIER=FL /STK=1 /UG=Mm.3968 /LL=26409 /UG_GENE=Map3k7 /DEF=Mouse mRNA for TAK1 (TGF-beta-activated kinase), complete cds. /PROD=TAK1 (TGF-beta-activated kinase) /FL=gb:D76446.1	428.05	889.85	0.00104287	2.07885	Map3k7
1439197_at	gb:BB371241 /DB_XREF=gi:16406944 /DB_XREF=BB371241 /CLONE=C130058A01 /FEA=EST /CNT=11 /TID=Mm.126933.1 /TIER=Stack /STK=8 /UG=Mm.126933 /UG_TITLE=ESTs, Highly similar to phosphatidylinositol 4-kinase (R.norvegicus)	296.6	616.1	0.00587544	2.07721	Pi4kb
1425148_a_at	gb:BC025911.1 /DB_XREF=gi:19483993 /FEA=FLmRNA /CNT=27 /TID=Mm.28240.1 /TIER=FL /STK=5 /UG=Mm.28240 /LL=72183 /UG_GENE=2810425K19Rik /DEF=Mus musculus, Similar to sorting nexin 6, clone MGC:32316 IMAGE:5027318, mRNA, complete cds. /PROD=Similar to sorting nexin 6 /FL=gb:BC025911.1	425.6	883.55	0.000105035	2.07601	Snx6
1420175_at	gb:C85320 /DB_XREF=gi:2917277 /DB_XREF=C85320 /CLONE=J0206B11 /FEA=EST /CNT=1 /TID=Mm.195286.1 /TIER=ConsEnd /STK=0 /UG=Mm.195286 /LL=52280 /UG_GENE=D6Ertd404e /UG_TITLE=DNA segment, Chr 6, ERATO Doi 404, expressed	104.15	215.95	0.00877827	2.07345	Tax1bp1
1427225_at	gb:AF057286.1 /DB_XREF=gi:3063648 /FEA=mRNA /CNT=151 /TID=Mm.139695.1 /TIER=Stack /STK=78 /UG=Mm.139695 /LL=13855 /UG_GENE=Epn2 /DEF=Mus musculus intersectin-EH binding protein Ibp2 mRNA, partial cds. /PROD=intersectin-EH binding protein Ibp2	857.5	1775.9	0.00605919	2.07102	Epn2
1443225_at	gb:BB396526 /DB_XREF=gi:16410533 /DB_XREF=BB396526 /CLONE=C230097P10 /FEA=EST /CNT=3 /TID=Mm.208043.1 /TIER=ConsEnd /STK=3 /UG=Mm.208043 /UG_TITLE=ESTs, Moderately similar to transforming growth factor-beta type I receptor, ESK 2 precursor (M.musculus)	118.45	245.2	0.00863613	2.07007	Acvr1c
1436892_at	gb:BB133520 /DB_XREF=gi:16266546 /DB_XREF=BB133520 /CLONE=9830106O05 /FEA=EST /CNT=46 /TID=Mm.205563.1 /TIER=Stack /STK=38 /UG=Mm.205563 /UG_TITLE=ESTs, Weakly similar to RU17_MOUSE U1 small nuclear ribonucleoprotein 70 kDa (U1 SNRNP 70 kDa) (snRNP70) (M.musculus)	622.1	1286.6	0.00469094	2.06816	Spred2
1429045_at	gb:AW060936 /DB_XREF=gi:6008687 /DB_XREF=UI-M-BH1-anv-e-05-0-UI.s1 /CLONE=UI-M-BH1-anv-e-05-0-UI /FEA=mRNA /CNT=73 /TID=Mm.45797.1 /TIER=Stack /STK=13 /UG=Mm.45797 /LL=66313 /UG_GENE=2810411E22Rik /UG_TITLE=RIKEN cDNA 2810411E22 gene	391.05	808.55	0.00822234	2.06764	Smurf2
1437422_at	gb:AV375653 /DB_XREF=gi:16397997 /DB_XREF=AV375653 /CLONE=9130201M22 /FEA=EST /CNT=22 /TID=Mm.54181.1 /TIER=Stack /STK=18 /UG=Mm.54181 /UG_TITLE=ESTs	1552.75	3204.1	0.00141177	2.0635	Sema5a
1454604_s_at	gb:BB072896 /DB_XREF=gi:15406853 /DB_XREF=BB072896 /CLONE=9030619E17 /FEA=EST /CNT=222 /TID=Mm.21950.1 /TIER=Stack /STK=174 /UG=Mm.21950 /LL=58888 /UG_GENE=AI426782 /UG_TITLE=EST AI426782	281.9	579.7	0.0085562	2.0564	Tspan12
1436966_at	gb:BB337121 /DB_XREF=gi:9045884 /DB_XREF=BB337121 /CLONE=B930006J15 /FEA=EST /CNT=48 /TID=Mm.51196.1 /TIER=Stack /STK=32 /UG=Mm.51196 /LL=105714 /UG_GENE=BB129927 /UG_TITLE=expressed sequence BB129927	138.85	285.15	0.00314009	2.05366	BB337121
1421252_a_at	gb:NM_013597.1 /DB_XREF=gi:7305264 /GEN=Mef2a /FEA=FLmRNA /CNT=13 /TID=Mm.87279.1 /TIER=FL /STK=2 /UG=Mm.87279 /LL=17258 /DEF=Mus musculus myocyte enhancer factor 2A (Mef2a), mRNA. /PROD=myocyte enhancer factor 2A /FL=gb:U30823.1 gb:NM_013597.1	339.75	697.35	0.00817058	2.05254	Mef2a
1440193_at	gb:AV346451 /DB_XREF=gi:16397069 /DB_XREF=AV346451 /CLONE=6430579L11 /FEA=EST /CNT=14 /TID=Mm.86058.1 /TIER=ConsEnd /STK=5 /UG=Mm.86058 /LL=106756 /UG_GENE=AV347965 /UG_TITLE=expressed sequence AV347965	1103.65	2263.85	0.000248039	2.05124	Ankrd12
1448939_at	gb:NM_013918.1 /DB_XREF=gi:7305616 /GEN=Usp25 /FEA=FLmRNA /CNT=132 /TID=Mm.40986.1 /TIER=FL+Stack /STK=30 /UG=Mm.40986 /LL=30940 /DEF=Mus musculus ubiquitin specific protease 25 (Usp25), mRNA. /PROD=ubiquitin specific protease 25 /FL=gb:NM_013918.1 gb:AF170563.1	310.25	635.6	0.00724466	2.04867	Usp25
1442095_at	gb:BB528113 /DB_XREF=gi:16444590 /DB_XREF=BB528113 /CLONE=D930044O18 /FEA=EST /CNT=6 /TID=Mm.103436.1 /TIER=ConsEnd /STK=3 /UG=Mm.103436 /UG_TITLE=ESTs	179.55	367.7	0.00638023	2.0479	Asxl3
1449870_a_at	gb:NM_011596.1 /DB_XREF=gi:6755798 /GEN=Atp6v0a2 /FEA=FLmRNA /CNT=10 /TID=Mm.1158.1 /TIER=FL /STK=5 /UG=Mm.1158 /LL=21871 /DEF=Mus musculus ATPase, H+ transporting, lysosomal V0 subunit a isoform 2 (Atp6v0a2), mRNA. /PROD=ATPase, H+ transporting, lysosomal V0 subunit aisoform 2 /FL=gb:NM_011596.1 gb:M31226.1	299.7	613.5	0.00430339	2.04705	Atp6v0a2
1457409_at	gb:BB484070 /DB_XREF=gi:16441115 /DB_XREF=BB484070 /CLONE=D430023I23 /FEA=EST /CNT=5 /TID=Mm.39101.1 /TIER=ConsEnd /STK=4 /UG=Mm.39101 /LL=100195 /UG_GENE=AI746471 /UG_TITLE=expressed sequence AI746471	1332.4	2727.05	0.00209866	2.04672	Fut9
1417623_at	gb:BG069726 /DB_XREF=gi:12552295 /DB_XREF=H3079D11-3 /CLONE=H3079D11 /FEA=FLmRNA /CNT=171 /TID=Mm.4168.1 /TIER=Stack /STK=24 /UG=Mm.4168 /LL=20496 /UG_GENE=Slc12a2 /UG_TITLE=solute carrier family 12, member 2 /FL=gb:U13174.1 gb:NM_009194.1	280.95	574	0.00710095	2.04307	Slc12a2
1428721_at	gb:AK012778.1 /DB_XREF=gi:12849744 /FEA=mRNA /CNT=45 /TID=Mm.50613.1 /TIER=Stack /STK=24 /UG=Mm.50613 /LL=66689 /UG_GENE=4122402F11Rik /UG_TITLE=RIKEN cDNA 4122402F11 gene /DEF=Mus musculus 10, 11 days embryo whole body cDNA, RIKEN full-length enriched library, clone:2810021G15:BTBPOZ domain containing protein, full insert sequence.	437.7	893	0.00240457	2.04021	Klhl28
1427877_at	gb:BB703070 /DB_XREF=gi:16051894 /DB_XREF=BB703070 /CLONE=7420447H19 /FEA=mRNA /CNT=185 /TID=Mm.27804.1 /TIER=Stack /STK=9 /UG=Mm.27804 /LL=69082 /UG_GENE=Ierepo4-pending /UG_TITLE=immediate early response, erythropoietin 4	2172.25	4431.25	0.000376031	2.03994	Zc3h15
1425383_a_at	gb:L27453.1 /DB_XREF=gi:456108 /GEN=PBX1B /FEA=FLmRNA /CNT=6 /TID=Mm.61526.2 /TIER=FL /STK=2 /UG=Mm.61526 /LL=18514 /DEF=Mus musculus PBX1B mRNA, complete cds. /PROD=homeobox protein /FL=gb:BC002244.1 gb:L27453.1	355	723.45	0.0012217	2.03789	Pbx1
1432882_at	gb:AK016539.1 /DB_XREF=gi:12855324 /FEA=mRNA /CNT=1 /TID=Mm.207047.1 /TIER=ConsEnd /STK=0 /UG=Mm.207047 /LL=114675 /UG_GENE=4932431P20Rik /UG_TITLE=RIKEN cDNA 4932431P20 gene /DEF=Mus musculus adult male testis cDNA, RIKEN full-length enriched library, clone:4932431P20:high mobility group box 1, full insert sequence.	79.2	161.3	0.00133458	2.03662	4932431P20Rik
1429590_at	gb:AK019530.1 /DB_XREF=gi:12859795 /FEA=mRNA /CNT=27 /TID=Mm.150176.1 /TIER=Stack /STK=13 /UG=Mm.150176 /LL=78791 /UG_GENE=4833447E04Rik /UG_TITLE=RIKEN cDNA 4833447E04 gene /DEF=Mus musculus 0 day neonate head cDNA, RIKEN full-length enriched library, clone:4833447E04:homolog to TRANSFORMING ACIDIC COILED-COIL-CONTAINING PROTEIN 3, full insert sequence.	543.35	1106.05	0.00743814	2.03561	Tacc1
1421027_a_at	gb:NM_025282.1 /DB_XREF=gi:13384623 /GEN=Mef2c /FEA=FLmRNA /CNT=41 /TID=Mm.24001.1 /TIER=FL /STK=2 /UG=Mm.24001 /LL=17260 /DEF=Mus musculus myocyte enhancer factor 2C (Mef2c), mRNA. /PROD=myocyte enhancer factor 2C /FL=gb:NM_025282.1	2653.4	5376.15	0.00341247	2.02614	Mef2c
1441987_at	gb:BB086698 /DB_XREF=gi:16260901 /DB_XREF=BB086698 /CLONE=9430004D19 /FEA=EST /CNT=21 /TID=Mm.71886.1 /TIER=ConsEnd /STK=3 /UG=Mm.71886 /LL=98804 /UG_GENE=AA536666 /UG_TITLE=expressed sequence AA536666	126.7	256.15	0.00135109	2.0217	BB086698
1425382_a_at	gb:U48399.1 /DB_XREF=gi:1808953 /GEN=mMIWC3 /FEA=FLmRNA /CNT=7 /TID=Mm.184351.1 /TIER=FL /STK=2 /UG=Mm.184351 /LL=11829 /DEF=Mus musculus mercurial-insensitive water channel 3 (mMIWC3) mRNA, complete cds. /PROD=mercurial-insensitive water channel 3 /FL=gb:U48398.1 gb:U48399.1	1362.85	2754.9	0.00529869	2.02143	Aqp4
1437656_at	gb:AV319307 /DB_XREF=gi:16394841 /DB_XREF=AV319307 /CLONE=6030405F07 /FEA=EST /CNT=22 /TID=Mm.185338.1 /TIER=Stack /STK=15 /UG=Mm.185338 /UG_TITLE=ESTs, Weakly similar to JC5583 85K SH3 domain-containing proline-rich protein - mouse (M.musculus)	296.4	598.35	0.00517765	2.01872	Arhgef4
1451350_a_at	gb:BF228243 /DB_XREF=gi:11136338 /DB_XREF=uz41f06.x1 /CLONE=IMAGE:3671651 /FEA=FLmRNA /CNT=117 /TID=Mm.4756.2 /TIER=Stack /STK=13 /UG=Mm.4756 /LL=16847 /UG_GENE=Lepr /UG_TITLE=leptin receptor /FL=gb:BC004744.1	407.3	821.65	0.00217221	2.01731	Leprot
1450083_at	gb:AI448404 /DB_XREF=gi:4282366 /DB_XREF=mo98g10.x1 /CLONE=IMAGE:567810 /FEA=FLmRNA /CNT=55 /TID=Mm.42183.1 /TIER=Stack /STK=10 /UG=Mm.42183 /LL=53621 /UG_GENE=Cnot4 /UG_TITLE=CCR4-NOT transcription complex, subunit 4 /FL=gb:NM_016877.1 gb:U71269.1	287.35	579.35	0.00273726	2.01618	Cnot4
1453578_at	gb:BM939099 /DB_XREF=gi:19398251 /DB_XREF=UI-M-BZ1-bkc-c-08-0-UI.r1 /CLONE=UI-M-BZ1-bkc-c-08-0-UI /FEA=mRNA /CNT=20 /TID=Mm.81159.2 /TIER=ConsEnd /STK=1 /UG=Mm.81159 /LL=68921 /UG_GENE=1110065A22Rik /UG_TITLE=RIKEN cDNA 1110065A22 gene	162.5	327.6	0.0025181	2.016	Pter
1439846_at	gb:BM249597 /DB_XREF=gi:17884867 /DB_XREF=K0836A05-3 /CLONE=K0836A05 /FEA=EST /CNT=10 /TID=Mm.19293.1 /TIER=ConsEnd /STK=6 /UG=Mm.19293 /LL=30922 /UG_GENE=AI225908 /UG_TITLE=EST AI225908	242.45	488.4	0.00453693	2.01444	Klf12
1437641_at	gb:BE981473 /DB_XREF=gi:10650615 /DB_XREF=UI-M-CG0p-bdc-e-12-0-UI.s1 /CLONE=UI-M-CG0p-bdc-e-12-0-UI /FEA=EST /CNT=28 /TID=Mm.21524.1 /TIER=Stack /STK=15 /UG=Mm.21524 /LL=99938 /UG_GENE=BB077382 /UG_TITLE=expressed sequence BB077382	75.9	152.7	0.000719611	2.01186	Rprd2
1429488_at	gb:AK017682.1 /DB_XREF=gi:12857044 /FEA=mRNA /CNT=48 /TID=Mm.103500.1 /TIER=Stack /STK=18 /UG=Mm.103500 /LL=68268 /UG_GENE=9130404H11Rik /UG_TITLE=RIKEN cDNA 9130404H11 gene /DEF=Mus musculus 8 days embryo whole body cDNA, RIKEN full-length enriched library, clone:5730465I09:DHHC zinc finger domain containing protein, full insert sequence.	794.4	1595.5	0.00112352	2.00843	Zdhhc21
1437878_s_at	gb:BB711506 /DB_XREF=gi:16064675 /DB_XREF=BB711506 /CLONE=B020024M07 /FEA=EST /CNT=26 /TID=Mm.26219.3 /TIER=Stack /STK=13 /UG=Mm.26219 /LL=67535 /UG_GENE=4921507O14Rik /UG_TITLE=RIKEN cDNA 4921507O14 gene	460.7	925.2	0.00201768	2.00825	Ttc14
1452741_s_at	gb:BQ175968 /DB_XREF=gi:20351460 /DB_XREF=UI-M-DJ2-bwf-p-16-0-UI.s1 /CLONE=UI-M-DJ2-bwf-p-16-0-UI /FEA=mRNA /CNT=208 /TID=Mm.41718.1 /TIER=Stack /STK=66 /UG=Mm.41718 /UG_TITLE=Mus musculus 10 days embryo whole body cDNA, RIKEN full-length enriched library, clone:2610001M21:glycerol phosphate dehydrogenase 1, mitochondrial, full insert sequence	564.25	1129.75	0.00033306	2.00222	Gpd2
1437801_at	gb:BM115860 /DB_XREF=gi:17078878 /DB_XREF=L0826E05-3 /CLONE=L0826E05 /FEA=EST /CNT=15 /TID=Mm.196508.8 /TIER=Stack /STK=14 /UG=Mm.196508 /LL=21761 /UG_GENE=Tex189 /UG_TITLE=testis expressed gene 189	1886.05	3770.65	0.0067731	1.99923	Morf4l1
