# Supplementary material for: ACE Inhibition with Captopril Retards the Development of Signs of Neurodegeneration in an Animal Model of Alzheimer’s Disease
Source: Int J Mol Sci. 2013 Aug 16;14(8):16917–42. doi: 10.3390/ijms140816917 (PMC3759943; doi:10.3390/ijms140816917)
Supplement: Supplementary File 2 — Supplementary2 (XLS, 2160 KB) [file ijms-14-16917-s002.xls]

## Sheet: Blatt1
Table S2. Significantly decreased hippocampal probe sets (P≤0.01, just alpha, no false discovery correction, and ≤-2-fold difference) of 18 month-old captopril-treated Tg2576 mice (Tg-18mo-ACEI) compared to age-matched untreated controls (Tg-18mo).
Affymetrix-ID	Descriptions	Mean-Tg-18mo	Mean-Tg-18mo-ACEI	Raw p value	Fold change (ratio Tg-18mo-ACEI/Tg-18mo)	Gene name
1424938_at	gb:AF297098.1 /DB_XREF=gi:15077325 /FEA=FLmRNA /CNT=16 /TID=Mm.85429.1 /TIER=FL+Stack /STK=11 /UG=Mm.85429 /LL=70358 /UG_GENE=Steap /DEF=Mus musculus six-transmembrane epithelial antigen of the prostate mRNA, complete cds. /PROD=six-transmembrane epithelial antigen of theprostate /FL=gb:AF297098.1	234.25	25.4	0.00810189	0.108431	Steap1
1460569_x_at	gb:AW611462 /DB_XREF=gi:7316648 /DB_XREF=un63d11.x1 /CLONE=IMAGE:2503317 /FEA=EST /CNT=39 /TID=Mm.28921.5 /TIER=Stack /STK=27 /UG=Mm.28921 /LL=12739 /UG_GENE=Cldn3 /UG_TITLE=claudin 3	102.2	11.85	0.00661773	0.115949	Cldn3
1419133_at	gb:NM_025276.1 /DB_XREF=gi:13384613 /GEN=Evpl /FEA=FLmRNA /CNT=28 /TID=Mm.27181.1 /TIER=FL+Stack /STK=13 /UG=Mm.27181 /LL=14027 /DEF=Mus musculus envoplakin (Evpl), mRNA. /PROD=envoplakin /FL=gb:NM_025276.1	199.4	24.25	0.000592842	0.121615	Evpl
1451701_x_at	gb:BC012650.1 /DB_XREF=gi:15215060 /FEA=FLmRNA /CNT=4 /TID=Mm.28921.2 /TIER=FL /STK=2 /UG=Mm.28921 /LL=12739 /UG_GENE=Cldn3 /DEF=Mus musculus, Similar to claudin 3, clone MGC:13769 IMAGE:4217040, mRNA, complete cds. /PROD=Similar to claudin 3 /FL=gb:BC012650.1	110.1	16.15	0.002139	0.146685	Cldn3
1439113_at	gb:BB379753 /DB_XREF=gi:16407852 /DB_XREF=BB379753 /CLONE=C230001I10 /FEA=EST /CNT=14 /TID=Mm.31130.1 /TIER=Stack /STK=8 /UG=Mm.31130 /UG_TITLE=ESTs, Moderately similar to VIS3 MOUSE VISININ-LIKE PROTEIN 3 (M.musculus)	173.25	25.8	0.00388373	0.148918	BB379753
1456418_at	gb:BB769641 /DB_XREF=gi:16212183 /DB_XREF=BB769641 /CLONE=G370098K19 /FEA=EST /CNT=14 /TID=Mm.48363.1 /TIER=Stack /STK=10 /UG=Mm.48363 /UG_TITLE=ESTs, Weakly similar to IRKA_MOUSE ATP-sensitive inward rectifier potassium channel 10 (Potassium channel, inwardly rectifying, subfamily J, member 10) (Inward rectifier K+ channel Kir4.1) (M.musculus)	1634.05	244.3	0.00249593	0.149506	Kcnj13
1448680_at	gb:NM_009245.1 /DB_XREF=gi:6678082 /GEN=Spi1-3 /FEA=FLmRNA /CNT=66 /TID=Mm.196591.1 /TIER=FL+Stack /STK=48 /UG=Mm.196591 /LL=20702 /DEF=Mus musculus serine protease inhibitor 1-3 (Spi1-3), mRNA. /PROD=serine protease inhibitor 1-3 /FL=gb:M75720.1 gb:NM_009245.1	154.6	24.05	0.001602	0.155563	Spi1-3
1454866_s_at	gb:BQ176424 /DB_XREF=gi:20351916 /DB_XREF=UI-M-DJ2-bwf-f-03-0-UI.s1 /CLONE=UI-M-DJ2-bwf-f-03-0-UI /FEA=EST /CNT=47 /TID=Mm.44747.1 /TIER=Stack /STK=40 /UG=Mm.44747 /LL=106380 /UG_GENE=AW045520 /UG_TITLE=expressed sequence AW045520	2606.95	438.65	1.39712e-05	0.168262	Clic6
1417231_at	gb:BC015252.1 /DB_XREF=gi:15929633 /FEA=FLmRNA /CNT=105 /TID=Mm.117068.1 /TIER=FL+Stack /STK=52 /UG=Mm.117068 /LL=12738 /UG_GENE=Cldn2 /DEF=Mus musculus, claudin 2, clone MGC:18348 IMAGE:4223446, mRNA, complete cds. /PROD=claudin 2 /FL=gb:AF072128.1 gb:BC015252.1 gb:NM_016675.1	652.4	110	0.000548704	0.168608	Cldn2
1449478_at	gb:NM_010810.1 /DB_XREF=gi:6754715 /GEN=Mmp7 /FEA=FLmRNA /CNT=14 /TID=Mm.4825.1 /TIER=FL+Stack /STK=10 /UG=Mm.4825 /LL=17393 /DEF=Mus musculus matrix metalloproteinase 7 (Mmp7), mRNA. /PROD=matrix metalloproteinase 7 /FL=gb:L36244.1 gb:NM_010810.1	94.9	16.65	0.00526489	0.175448	Mmp7
1443723_at	gb:BE995087 /DB_XREF=gi:10678978 /DB_XREF=UI-M-CG0p-bil-a-04-0-UI.s1 /CLONE=UI-M-CG0p-bil-a-04-0-UI /FEA=EST /CNT=3 /TID=Mm.153103.1 /TIER=ConsEnd /STK=3 /UG=Mm.153103 /UG_TITLE=ESTs	287.7	51.65	0.00048644	0.179527	Trpm3
1429135_at	gb:AV015858 /DB_XREF=gi:4792850 /DB_XREF=AV015858 /CLONE=1110061N17 /FEA=mRNA /CNT=15 /TID=Mm.23496.1 /TIER=Stack /STK=11 /UG=Mm.23496 /LL=68800 /UG_GENE=1110059M19Rik /UG_TITLE=RIKEN cDNA 1110059M19 gene	463.5	85.9	0.00231976	0.185329	1110059M19Rik
1450995_at	gb:BG245669 /DB_XREF=gi:12755484 /DB_XREF=602358452F1 /CLONE=IMAGE:4487076 /FEA=FLmRNA /CNT=119 /TID=Mm.2135.1 /TIER=Stack /STK=22 /UG=Mm.2135 /LL=14275 /UG_GENE=Folr1 /UG_TITLE=folate receptor 1 (adult) /FL=gb:M64782.1 gb:AF096319.1 gb:NM_008034.1	1287.8	238.75	0.00499181	0.185394	Folr1
1425926_a_at	gb:BC017609.1 /DB_XREF=gi:17160873 /FEA=FLmRNA /CNT=2 /TID=Mm.134516.1 /TIER=FL /STK=1 /UG=Mm.134516 /DEF=Mus musculus, clone MGC:27657 IMAGE:4527414, mRNA, complete cds. /PROD=Unknown (protein for MGC:27657) /FL=gb:BC017609.1	321.65	63.1	0.000733472	0.196176	Otx2
1434165_at	gb:BQ176424 /DB_XREF=gi:20351916 /DB_XREF=UI-M-DJ2-bwf-f-03-0-UI.s1 /CLONE=UI-M-DJ2-bwf-f-03-0-UI /FEA=EST /CNT=47 /TID=Mm.44747.1 /TIER=Stack /STK=40 /UG=Mm.44747 /LL=106380 /UG_GENE=AW045520 /UG_TITLE=expressed sequence AW045520	1386.35	277.85	0.00170588	0.200418	Clic6
1433837_at	gb:AV365503 /DB_XREF=gi:16397643 /DB_XREF=AV365503 /CLONE=8430408G22 /FEA=EST /CNT=116 /TID=Mm.38231.1 /TIER=Stack /STK=57 /UG=Mm.38231 /UG_TITLE=ESTs, Weakly similar to T46271 hypothetical protein DKFZp564P1263.1 (H.sapiens)	141.4	29.95	0.000631673	0.21181	Depp
1428601_at	gb:AK005628.1 /DB_XREF=gi:12838302 /FEA=mRNA /CNT=47 /TID=Mm.17621.1 /TIER=Stack /STK=30 /UG=Mm.17621 /LL=71837 /UG_GENE=1700003E16Rik /UG_TITLE=RIKEN cDNA 1700003E16 gene /DEF=Mus musculus adult male testis cDNA, RIKEN full-length enriched library, clone:1700003E16:hypothetical protein, full insert sequence.	749.3	164.7	0.00363455	0.219805	1700003E16Rik
1423261_at	gb:BB426248 /DB_XREF=gi:16423663 /DB_XREF=BB426248 /CLONE=C630001B03 /FEA=FLmRNA /CNT=37 /TID=Mm.11819.1 /TIER=Stack /STK=21 /UG=Mm.11819 /LL=78896 /UG_GENE=1500015O10Rik /UG_TITLE=RIKEN cDNA 1500015O10 gene /FL=gb:BC002254.1 gb:NM_024283.1	2241.4	511.95	0.000360815	0.228406	Ecrg4
1448169_at	gb:NM_010664.1 /DB_XREF=gi:6754481 /GEN=Krt1-18 /FEA=FLmRNA /CNT=380 /TID=Mm.22479.1 /TIER=FL+Stack /STK=149 /UG=Mm.22479 /LL=16668 /DEF=Mus musculus keratin complex 1, acidic, gene 18 (Krt1-18), mRNA. /PROD=keratin complex 1, acidic, gene 18 /FL=gb:M36376.1 gb:NM_010664.1 gb:M11686.1	490.55	113.9	0.000650037	0.232188	Krt18
1433734_at	gb:BB192951 /DB_XREF=gi:16270814 /DB_XREF=BB192951 /CLONE=A330074N15 /FEA=EST /CNT=68 /TID=Mm.23666.1 /TIER=Stack /STK=66 /UG=Mm.23666 /UG_TITLE=ESTs, Weakly similar to SODIUMSULFATE COTRANSPORTER (R.norvegicus)	957.05	229.25	0.0046597	0.239538	Slc13a4
1438947_x_at	gb:BB459744 /DB_XREF=gi:9355237 /DB_XREF=BB459744 /CLONE=D130063D24 /FEA=EST /CNT=9 /TID=Mm.121306.1 /TIER=Stack /STK=9 /UG=Mm.121306 /UG_TITLE=ESTs	998.85	242.15	0.00113651	0.242429	BB459744
1424713_at	gb:AY061807.1 /DB_XREF=gi:17426417 /FEA=FLmRNA /CNT=50 /TID=Mm.28623.1 /TIER=FL+Stack /STK=18 /UG=Mm.28623 /LL=75600 /UG_GENE=Calml4 /DEF=Mus musculus calmodulin-related protein mRNA, complete cds. /PROD=calmodulin-related protein /FL=gb:AY061807.1 gb:BC023475.1	1245.6	308.75	0.000148973	0.247872	Calml4
1460049_s_at	gb:BB392676 /DB_XREF=gi:9115639 /DB_XREF=BB392676 /CLONE=C230080B21 /FEA=EST /CNT=5 /TID=Mm.213028.1 /TIER=ConsEnd /STK=5 /UG=Mm.213028 /UG_TITLE=ESTs	3759.35	933.75	0.00223914	0.248381	Ecrg4
1417545_at	gb:NM_022017.1 /DB_XREF=gi:11528501 /GEN=Trpv4 /FEA=FLmRNA /CNT=73 /TID=Mm.91441.1 /TIER=FL+Stack /STK=42 /UG=Mm.91441 /LL=63873 /DEF=Mus musculus transient receptor potential cation channel, subfamily V, member 4 (Trpv4), mRNA. /PROD=transient receptor potential cation channel,subfamily V, member 4 /FL=gb:NM_022017.1 gb:AF208026.1 gb:AF279672.1 gb:AF263522.1	132.45	34	0.00520571	0.256701	Trpv4
1420445_at	gb:NM_020516.1 /DB_XREF=gi:10048451 /GEN=Slc16a8 /FEA=FLmRNA /CNT=9 /TID=Mm.6212.1 /TIER=FL /STK=5 /UG=Mm.6212 /LL=57274 /DEF=Mus musculus solute carrier family 16 (monocarboxylic acid transporters), member 8 (Slc16a8), mRNA. /PROD=solute carrier family 16 (monocarboxylic acidtransporters), member 8 /FL=gb:NM_020516.1 gb:BC018216.1 gb:AF019111.2	193.05	49.8	0.00482053	0.257964	Slc16a8
1418595_at	gb:NM_020568.1 /DB_XREF=gi:10181203 /GEN=S3-12-pending /FEA=FLmRNA /CNT=45 /TID=Mm.12966.1 /TIER=FL+Stack /STK=21 /UG=Mm.12966 /LL=57435 /DEF=Mus musculus plasma membrane associated protein, S3-12 (S3-12-pending), mRNA. /PROD=plasma membrane associated protein, S3-12 /FL=gb:AF064748.1 gb:NM_020568.1	307.1	81	0.00613562	0.263758	Plin4
1449421_a_at	gb:NM_134110.1 /DB_XREF=gi:19882204 /GEN=2200002I16Rik /FEA=FLmRNA /CNT=17 /TID=Mm.156736.1 /TIER=FL+Stack /STK=11 /UG=Mm.156736 /LL=106387 /DEF=Mus musculus RIKEN cDNA 2200002I16 gene (2200002I16Rik), mRNA. /PROD=minK-related peptide 1 /FL=gb:NM_134110.1	691.3	188.2	0.0075858	0.272241	Kcne2
1417616_at	gb:NM_009180.1 /DB_XREF=gi:6677962 /GEN=Siat7b /FEA=FLmRNA /CNT=98 /TID=Mm.3947.1 /TIER=FL+Stack /STK=40 /UG=Mm.3947 /LL=20446 /DEF=Mus musculus sialyltransferase 7 ((alpha-N-acetylneuraminyl 2,3-beta-galactosyl-1,3)-N-acetyl galactosaminde alpha-2,6-sialyltransferase) B (Siat7b), mRNA. /PROD=sialyltransferase 7 ((alpha-N-acetylneuraminyl2,3-beta-galactosyl-1,3)-N-acetyl galactosamindealpha-2,6-s…	154.45	42.75	0.00520298	0.276789	Siat7b
1452417_x_at	gb:AV057155 /DB_XREF=gi:5156902 /DB_XREF=AV057155 /CLONE=1810044K02 /FEA=mRNA /CNT=13 /TID=Mm.104747.14 /TIER=ConsEnd /STK=2 /UG=Mm.104747 /LL=16114 /UG_GENE=Igk-V28 /UG_TITLE=immunoglobulin kappa chain variable 28 (V28)	1012.6	287.65	0.000942791	0.284071	Igk-V28
1427455_x_at	gb:BI107286 /DB_XREF=gi:14558179 /DB_XREF=602894285F1 /CLONE=IMAGE:5039325 /FEA=mRNA /CNT=15 /TID=Mm.104747.15 /TIER=ConsEnd /STK=0 /UG=Mm.104747 /LL=16114 /UG_GENE=Igk-V28 /UG_TITLE=immunoglobulin kappa chain variable 28 (V28)	757.35	216.9	0.000356016	0.286393	Igk-V28
1455582_at	gb:BI156044 /DB_XREF=gi:14616045 /DB_XREF=602903593F1 /CLONE=IMAGE:5033207 /FEA=EST /CNT=37 /TID=Mm.9653.3 /TIER=Stack /STK=10 /UG=Mm.9653 /LL=23882 /UG_GENE=Gadd45g /UG_TITLE=growth arrest and DNA-damage-inducible 45 gamma	111.5	32.6	0.00522286	0.292377	C1qtnf1
1437397_at	gb:AW554594 /DB_XREF=gi:7200017 /DB_XREF=L0242H04-3 /CLONE=L0242H04 /FEA=EST /CNT=82 /TID=Mm.10516.1 /TIER=Stack /STK=18 /UG=Mm.10516 /LL=105935 /UG_GENE=AI987712 /UG_TITLE=expressed sequence AI987712	542.25	161.4	0.000336965	0.297649	Prlr
1427660_x_at	gb:BC013496.1 /DB_XREF=gi:15488700 /FEA=mRNA /CNT=2 /TID=Mm.104747.19 /TIER=ConsEnd /STK=0 /UG=Mm.104747 /LL=16114 /UG_GENE=Igk-V28 /DEF=Mus musculus, clone IMAGE:4219618, mRNA, partial cds. /PROD=Unknown (protein for IMAGE:4219618)	1141.05	343.6	0.00102429	0.301126	Igk-V28
1454159_a_at	gb:AK011784.1 /DB_XREF=gi:12848127 /FEA=mRNA /CNT=1 /TID=Mm.141936.2 /TIER=ConsEnd /STK=0 /UG=Mm.141936 /LL=16008 /UG_GENE=Igfbp2 /UG_TITLE=insulin-like growth factor binding protein 2 /DEF=Mus musculus 10 days embryo whole body cDNA, RIKEN full-length enriched library, clone:2610100G24:insulin-like growth factor binding protein 2, full insert sequence.	2942.1	893.7	0.000142846	0.303763	Igfbp
1455090_at	gb:BF681826 /DB_XREF=gi:11955721 /DB_XREF=602117651F1 /CLONE=IMAGE:3468684 /FEA=EST /CNT=43 /TID=Mm.19081.1 /TIER=Stack /STK=25 /UG=Mm.19081 /LL=99355 /UG_GENE=AW260363 /UG_TITLE=expressed sequence AW260363	317.45	97.55	0.00471726	0.307292	AW260363
1448415_a_at	gb:NM_009153.1 /DB_XREF=gi:6677912 /GEN=Sema3b /FEA=FLmRNA /CNT=159 /TID=Mm.4083.1 /TIER=FL+Stack /STK=76 /UG=Mm.4083 /LL=20347 /DEF=Mus musculus sema domain, immunoglobulin domain (Ig), short basic domain, secreted, (semaphorin) 3B (Sema3b), mRNA. /PROD=sema domain, immunoglobulin domain (Ig), shortbasic domain, secreted, (semaphorin) 3B /FL=gb:NM_009153.1	146.2	45.65	0.00250712	0.312244	Sema3b
1418907_at	gb:BB799410 /DB_XREF=gi:16969033 /DB_XREF=BB799410 /CLONE=G630023D14 /FEA=FLmRNA /CNT=57 /TID=Mm.12900.1 /TIER=ConsEnd /STK=5 /UG=Mm.12900 /LL=14067 /UG_GENE=F5 /UG_TITLE=coagulation factor V /FL=gb:NM_007976.1 gb:U52925.1	423.55	132.45	0.00948904	0.312714	F5
1425385_a_at	gb:BC018365.1 /DB_XREF=gi:17390851 /FEA=FLmRNA /CNT=9 /TID=Mm.144308.1 /TIER=FL /STK=2 /UG=Mm.144308 /LL=16014 /UG_GENE=Igh-1 /DEF=Mus musculus, Similar to immunoglobulin heavy chain 1 (serum IgG2a), clone MGC:18751 IMAGE:4009847, mRNA, complete cds. /PROD=Similar to immunoglobulin heavy chain 1 (serumIgG2a) /FL=gb:BC018365.1	290.9	91.85	0.00235588	0.315744	Igh-1
1448556_at	gb:BC005555.1 /DB_XREF=gi:13542694 /FEA=FLmRNA /CNT=81 /TID=Mm.2752.1 /TIER=FL+Stack /STK=59 /UG=Mm.2752 /LL=19116 /UG_GENE=Prlr /DEF=Mus musculus, prolactin receptor, clone MGC:6165 IMAGE:3586308, mRNA, complete cds. /PROD=prolactin receptor /FL=gb:D10214.1 gb:NM_011169.1 gb:L14811.1 gb:L13593.1 gb:BC006652.1 gb:BC005555.1	313.95	99.25	0.00925012	0.316133	Prlr
1452463_x_at	gb:BG966217 /DB_XREF=gi:14353854 /DB_XREF=602830177F1 /CLONE=IMAGE:4984819 /FEA=mRNA /CNT=7 /TID=Mm.104747.17 /TIER=ConsEnd /STK=0 /UG=Mm.104747 /LL=16114 /UG_GENE=Igk-V28 /UG_TITLE=immunoglobulin kappa chain variable 28 (V28)	187.05	59.15	0.00441387	0.316226	Igk-V28
1451885_at	gb:BC019382.1 /DB_XREF=gi:18043898 /FEA=FLmRNA /CNT=2 /TID=Mm.172457.1 /TIER=FL /STK=1 /UG=Mm.172457 /DEF=Mus musculus, metallothionein 2A, clone MGC:30400 IMAGE:4501155, mRNA, complete cds. /PROD=metallothionein 2A /FL=gb:BC019382.1	121.15	38.65	0.00979859	0.319026	removed
1460250_at	gb:BC021458.1 /DB_XREF=gi:18204790 /FEA=FLmRNA /CNT=73 /TID=Mm.43375.1 /TIER=FL+Stack /STK=13 /UG=Mm.43375 /LL=66042 /UG_GENE=0610006G05Rik /DEF=Mus musculus, RIKEN cDNA 0610006G05 gene, clone MGC:29422 IMAGE:5064413, mRNA, complete cds. /PROD=RIKEN cDNA 0610006G05 gene /FL=gb:BC021458.1 gb:NM_025312.1	541.4	174	1.06783e-05	0.321389	Sostdc1
1417109_at	gb:BC005738.1 /DB_XREF=gi:13543124 /FEA=FLmRNA /CNT=102 /TID=Mm.15801.1 /TIER=FL+Stack /STK=56 /UG=Mm.15801 /LL=94242 /UG_GENE=Lcn7 /DEF=Mus musculus, clone MGC:6860 IMAGE:2650851, mRNA, complete cds. /PROD=Unknown (protein for MGC:6860) /FL=gb:BC005738.1 gb:NM_023476.1 gb:BC018539.1 gb:AB047402.1	253.7	84	0.0077442	0.3311	Tinagl1
1418440_at	gb:NM_007739.1 /DB_XREF=gi:6680973 /GEN=Col8a1 /FEA=FLmRNA /CNT=73 /TID=Mm.86813.1 /TIER=FL+Stack /STK=23 /UG=Mm.86813 /LL=12837 /DEF=Mus musculus procollagen, type VIII, alpha 1 (Col8a1), mRNA. /PROD=procollagen, type VIII, alpha 1 /FL=gb:BC011061.1 gb:NM_007739.1	298.85	100.5	0.00644166	0.336289	Col8a1
1423400_at	gb:BQ175355 /DB_XREF=gi:20350847 /DB_XREF=UI-M-DJ2-bwc-j-05-0-UI.s1 /CLONE=UI-M-DJ2-bwc-j-05-0-UI /FEA=FLmRNA /CNT=45 /TID=Mm.6500.1 /TIER=Stack /STK=8 /UG=Mm.6500 /LL=16591 /UG_GENE=Kl /UG_TITLE=klotho /FL=gb:AB005141.1 gb:NM_013823.1	1626.55	553	0.0020434	0.339983	Klotho
1429900_at	gb:BM241296 /DB_XREF=gi:17876566 /DB_XREF=K0615A02-3 /CLONE=K0615A02 /FEA=mRNA /CNT=10 /TID=Mm.109877.1 /TIER=ConsEnd /STK=6 /UG=Mm.109877 /LL=76671 /UG_GENE=5330406M23Rik /UG_TITLE=RIKEN cDNA 5330406M23 gene	180.15	62.1	0.00581546	0.344713	5330406M23Rik
1427509_at	gb:BC022659.1 /DB_XREF=gi:18490483 /FEA=mRNA /CNT=12 /TID=Mm.180687.2 /TIER=ConsEnd /STK=0 /UG=Mm.180687 /LL=68327 /UG_GENE=0610007P22Rik /DEF=Mus musculus, clone IMAGE:4220403, mRNA, partial cds. /PROD=Unknown (protein for IMAGE:4220403)	567.6	198	0.007878	0.348837	Baiap3
1448152_at	gb:NM_010514.1 /DB_XREF=gi:6754309 /GEN=Igf2 /FEA=FLmRNA /CNT=323 /TID=Mm.3862.1 /TIER=FL+Stack /STK=166 /UG=Mm.3862 /LL=16002 /DEF=Mus musculus insulin-like growth factor 2 (Igf2), mRNA. /PROD=insulin-like growth factor 2 /FL=gb:NM_010514.1 gb:M14951.1	3379.6	1183.7	0.000550305	0.350249	Igf2
1419147_at	gb:NM_020002.1 /DB_XREF=gi:9910527 /GEN=Rec8-pending /FEA=FLmRNA /CNT=21 /TID=Mm.23149.1 /TIER=FL+Stack /STK=13 /UG=Mm.23149 /LL=56739 /DEF=Mus musculus meiotic cohesion Rec8 (Rec8-pending), mRNA. /PROD=meiotic cohesion Rec8 /FL=gb:AF262055.1 gb:NM_020002.1	132.85	46.75	0.0025589	0.351901	Rec8; meiosis
1457612_at	gb:BG061840 /DB_XREF=gi:12531743 /DB_XREF=L0951H05-3 /CLONE=L0951H05 /FEA=EST /CNT=4 /TID=Mm.214910.1 /TIER=ConsEnd /STK=4 /UG=Mm.214910 /UG_TITLE=ESTs, Moderately similar to G3P MOUSE GLYCERALDEHYDE 3-PHOSPHATE DEHYDROGENASE (M.musculus)	603.65	213.75	0.00166196	0.354096	L0951H05-3
1419692_a_at	gb:NM_008521.1 /DB_XREF=gi:6678733 /GEN=Ltc4s /FEA=FLmRNA /CNT=16 /TID=Mm.4088.1 /TIER=FL /STK=7 /UG=Mm.4088 /LL=17001 /DEF=Mus musculus leukotriene C4 synthase (Ltc4s), mRNA. /PROD=leukotriene C4 synthase /FL=gb:NM_008521.1 gb:U27195.1	588.75	212.4	0.00336988	0.360764	Ltc4s
1438200_at	gb:BB065799 /DB_XREF=gi:16259889 /DB_XREF=BB065799 /CLONE=8030446E18 /FEA=EST /CNT=49 /TID=Mm.45563.1 /TIER=Stack /STK=11 /UG=Mm.45563 /LL=98668 /UG_GENE=AW121680 /UG_TITLE=expressed sequence AW121680	670.2	242.8	0.0015969	0.36228	Sulf1
1418808_at	gb:NM_134006.1 /DB_XREF=gi:19549322 /GEN=Rdh5 /FEA=FLmRNA /CNT=28 /TID=Mm.7563.1 /TIER=FL+Stack /STK=18 /UG=Mm.7563 /LL=19682 /DEF=Mus musculus retinol dehydrogenase type 5 (Rdh5), mRNA. /PROD=retinol dehydrogenase type 5 /FL=gb:AF033196.1 gb:NM_134006.1 gb:AF033195.1 gb:AF013288.1 gb:BC021372.1	813.35	297.75	9.50847e-05	0.366079	Rdh5
1435721_at	gb:BE956674 /DB_XREF=gi:10601446 /DB_XREF=UI-M-BG2-bbn-a-05-0-UI.s1 /CLONE=UI-M-BG2-bbn-a-05-0-UI /FEA=EST /CNT=17 /TID=Mm.29281.1 /TIER=Stack /STK=14 /UG=Mm.29281 /UG_TITLE=ESTs	183.05	68.8	0.00681597	0.375854	Kcnq4
1448754_at	gb:NM_011254.1 /DB_XREF=gi:6755299 /GEN=Rbp1 /FEA=FLmRNA /CNT=93 /TID=Mm.2450.1 /TIER=FL+Stack /STK=42 /UG=Mm.2450 /LL=19659 /DEF=Mus musculus retinol binding protein 1, cellular (Rbp1), mRNA. /PROD=retinol binding protein 1, cellular /FL=gb:BC018254.1 gb:NM_011254.1	1804.25	680.3	0.00193185	0.377054	Rbp1
1442724_at	gb:AW120464 /DB_XREF=gi:6095797 /DB_XREF=UI-M-BH1-ami-a-07-0-UI.s2 /CLONE=UI-M-BH1-ami-a-07-0-UI /FEA=EST /CNT=4 /TID=Mm.54156.1 /TIER=ConsEnd /STK=3 /UG=Mm.54156 /LL=104993 /UG_GENE=AW060763 /UG_TITLE=expressed sequence AW060763	667.3	259.25	0.00363877	0.388506	Dlk1
1425247_a_at	gb:BC008237.1 /DB_XREF=gi:14198346 /FEA=FLmRNA /CNT=5 /TID=Mm.196085.1 /TIER=FL /STK=4 /UG=Mm.196085 /LL=16017 /UG_GENE=Igh-4 /DEF=Mus musculus, Similar to immunoglobulin heavy chain 4 (serum IgG1), clone MGC:6522 IMAGE:2651217, mRNA, complete cds. /PROD=Similar to immunoglobulin heavy chain 4 (serumIgG1) /FL=gb:BC008237.1	174	69.35	0.00602743	0.398563	Igh-4
1438781_at	gb:AU067701 /DB_XREF=gi:4968438 /DB_XREF=AU067701 /CLONE=MNCb-0594 /FEA=EST /CNT=11 /TID=Mm.38577.1 /TIER=Stack /STK=9 /UG=Mm.38577 /UG_TITLE=ESTs	151.2	60.6	0.00850233	0.400794	Tet2
1443798_at	gb:BB207248 /DB_XREF=gi:8872201 /DB_XREF=BB207248 /CLONE=A430080K21 /FEA=EST /CNT=3 /TID=Mm.131916.1 /TIER=ConsEnd /STK=3 /UG=Mm.131916 /UG_TITLE=ESTs	1096.9	447.6	0.0012752	0.408059	BB207248
1416637_at	gb:NM_009207.1 /DB_XREF=gi:6678020 /GEN=Slc4a2 /FEA=FLmRNA /CNT=139 /TID=Mm.4580.1 /TIER=FL+Stack /STK=77 /UG=Mm.4580 /LL=20535 /DEF=Mus musculus solute carrier family 4 (anion exchanger), member 2 (Slc4a2), mRNA. /PROD=solute carrier family 4 (anion exchanger),member 2 /FL=gb:J04036.1 gb:NM_009207.1	1422.25	584.85	0.00444961	0.411215	Slc4a2
1448550_at	gb:NM_008489.1 /DB_XREF=gi:6678669 /GEN=Lbp /FEA=FLmRNA /CNT=198 /TID=Mm.218846.1 /TIER=FL+Stack /STK=59 /UG=Mm.218846 /LL=16803 /DEF=Mus musculus lipopolysaccharide binding protein (Lbp), mRNA. /PROD=lipopolysaccharide binding protein /FL=gb:NM_008489.1 gb:BC004795.1	877.1	361.6	0.00670873	0.412268	Lbp
1426915_at	gb:BC021490.1 /DB_XREF=gi:18204816 /FEA=mRNA /CNT=66 /TID=Mm.24103.1 /TIER=Stack /STK=39 /UG=Mm.24103 /LL=69635 /UG_GENE=Dapk1 /DEF=Mus musculus, Similar to death-associated protein kinase 1, clone IMAGE:5345390, mRNA, partial cds. /PROD=Similar to death-associated protein kinase 1	5578.3	2350.55	0.00112022	0.421374	Dapk1
1433551_at	gb:AV173683 /DB_XREF=gi:16383915 /DB_XREF=AV173683 /CLONE=5730406G13 /FEA=EST /CNT=108 /TID=Mm.24704.1 /TIER=Stack /STK=95 /UG=Mm.24704 /LL=102065 /UG_GENE=AI427515 /UG_TITLE=expressed sequence AI427515	1162.45	491.1	0.0022793	0.42247	Vat1l
1448306_at	gb:NM_010907.1 /DB_XREF=gi:6754839 /GEN=Nfkbia /FEA=FLmRNA /CNT=183 /TID=Mm.8884.1 /TIER=FL+Stack /STK=97 /UG=Mm.8884 /LL=18035 /DEF=Mus musculus nuclear factor of kappa light chain gene enhancer in B-cells inhibitor, alpha (Nfkbia), mRNA. /PROD=nuclear factor of kappa light chain geneenhancer in B-cells inhibitor, alpha /FL=gb:NM_010907.1 gb:U36277.1	1414.85	598.65	0.000488669	0.423119	Nfkbia
1436484_at	gb:BB800286 /DB_XREF=gi:16969909 /DB_XREF=BB800286 /CLONE=G630029B03 /FEA=EST /CNT=9 /TID=Mm.39600.1 /TIER=Stack /STK=9 /UG=Mm.39600 /UG_TITLE=ESTs	169	71.8	0.000601653	0.424852	Fndc9
1435911_s_at	gb:BB043465 /DB_XREF=gi:15403907 /DB_XREF=BB043465 /CLONE=6030474C01 /FEA=EST /CNT=30 /TID=Mm.36104.1 /TIER=Stack /STK=12 /UG=Mm.36104 /LL=97671 /UG_GENE=D18347 /UG_TITLE=expressed sequence D18347	569.15	248.15	0.000302344	0.436001	Slc2a12
1448416_at	gb:NM_008597.1 /DB_XREF=gi:6678875 /GEN=Mglap /FEA=FLmRNA /CNT=136 /TID=Mm.193459.1 /TIER=FL+Stack /STK=76 /UG=Mm.193459 /LL=17313 /DEF=Mus musculus matrix gamma-carboxyglutamate (gla) protein (Mglap), mRNA. /PROD=matrix gamma-carboxyglutamate (gla) protein /FL=gb:NM_008597.1 gb:D00613.1	1274.6	556.85	0.00346976	0.436882	Mglap
1422586_at	gb:NM_021306.1 /DB_XREF=gi:10946605 /GEN=Ecel1 /FEA=FLmRNA /CNT=48 /TID=Mm.140765.1 /TIER=FL+Stack /STK=31 /UG=Mm.140765 /LL=13599 /DEF=Mus musculus endothelin converting enzyme-like 1 (Ecel1), mRNA. /PROD=damage-induced neuronal endopeptidase /FL=gb:NM_021306.1 gb:AB026294.1	502.15	220.1	0.00180528	0.438315	Ecel1
1447781_s_at	gb:AV214521 /DB_XREF=gi:6155367 /DB_XREF=AV214521 /CLONE=2410137B09 /FEA=EST /CNT=2 /TID=Mm.177917.1 /TIER=ConsEnd /STK=2 /UG=Mm.177917 /UG_TITLE=ESTs	145.2	63.8	0.00985098	0.439394	AV214521
1417440_at	gb:BG064710 /DB_XREF=gi:12547273 /DB_XREF=H3023A03-3 /CLONE=H3023A03 /FEA=FLmRNA /CNT=157 /TID=Mm.22478.1 /TIER=Stack /STK=23 /UG=Mm.22478 /LL=93760 /UG_GENE=Smarcf1 /UG_TITLE=SWISNF related, matrix associated, actin dependent regulator of chromatin, subfamily f, member 1 /FL=gb:NM_033566.1 gb:AF268912.1	2028.95	894.2	0.00130626	0.440721	Smarcf1
1452264_at	gb:BI408679 /DB_XREF=gi:15169602 /DB_XREF=602964304F1 /CLONE=IMAGE:5119896 /FEA=mRNA /CNT=61 /TID=Mm.29389.1 /TIER=Stack /STK=30 /UG=Mm.29389 /UG_TITLE=Mus musculus, Similar to KIAA1075 protein, clone IMAGE:5099327, mRNA, partial cds	272.35	120.5	0.00191943	0.442445	Tenc1
1443814_x_at	gb:BB542535 /DB_XREF=gi:9613758 /DB_XREF=BB542535 /CLONE=E130120M24 /FEA=EST /CNT=3 /TID=Mm.209186.1 /TIER=ConsEnd /STK=3 /UG=Mm.209186 /UG_TITLE=ESTs	479	212.15	0.00547192	0.442902	Ctsh
1448520_at	gb:NM_133865.1 /DB_XREF=gi:19527079 /GEN=AI452214 /FEA=FLmRNA /CNT=89 /TID=Mm.17343.1 /TIER=FL+Stack /STK=64 /UG=Mm.17343 /LL=99645 /DEF=Mus musculus expressed sequence AI452214 (AI452214), mRNA. /PROD=expressed sequence AI452214 /FL=gb:NM_133865.1 gb:BC011094.1	184.15	82.05	0.0042686	0.445561	Dclre1b
1437165_a_at	gb:BB250811 /DB_XREF=gi:8943557 /DB_XREF=BB250811 /CLONE=A730043A14 /FEA=EST /CNT=25 /TID=Mm.18808.3 /TIER=Stack /STK=24 /UG=Mm.18808 /LL=18542 /UG_GENE=Pcolce /UG_TITLE=procollagen C-proteinase enhancer protein	1184.8	529.05	0.00326829	0.446531	Pcolce
1436279_at	gb:AV292356 /DB_XREF=gi:15405827 /DB_XREF=AV292356 /CLONE=5430421D03 /FEA=EST /CNT=10 /TID=Mm.101448.1 /TIER=Stack /STK=10 /UG=Mm.101448 /UG_TITLE=ESTs	116.95	52.3	0.00718187	0.4472	AV292356
1416454_s_at	gb:NM_007392.1 /DB_XREF=gi:6671506 /GEN=Acta2 /FEA=FLmRNA /CNT=294 /TID=Mm.16537.1 /TIER=FL+Stack /STK=88 /UG=Mm.16537 /LL=11475 /DEF=Mus musculus actin, alpha 2, smooth muscle, aorta (Acta2), mRNA. /PROD=actin, alpha 2, smooth muscle, aorta /FL=gb:NM_007392.1	2029.55	908.3	0.00373842	0.447538	Acta2
1457523_at	gb:BB125017 /DB_XREF=gi:16262156 /DB_XREF=BB125017 /CLONE=9630002I21 /FEA=EST /CNT=4 /TID=Mm.188979.1 /TIER=ConsEnd /STK=4 /UG=Mm.188979 /UG_TITLE=ESTs	196.8	88.95	0.00185733	0.451982	9530056K15Rik
1451911_a_at	gb:M55333.1 /DB_XREF=gi:191589 /FEA=FLmRNA /CNT=1 /TID=Mm.754.1 /TIER=FL /STK=1 /UG=Mm.754 /LL=11421 /UG_GENE=Ace /DEF=Mouse testis-specific angiotensin-converting enzyme mRNA, complete cds. /PROD=angiotensin converting enzyme /FL=gb:M55333.1	358.25	162.25	0.00743071	0.452896	Ace
1423505_at	gb:BB114067 /DB_XREF=gi:8766635 /DB_XREF=BB114067 /CLONE=9530043O07 /FEA=FLmRNA /CNT=185 /TID=Mm.2006.1 /TIER=Stack /STK=14 /UG=Mm.2006 /LL=21345 /UG_GENE=Tagln /UG_TITLE=transgelin /FL=gb:U36588.1 gb:L41154.1 gb:NM_011526.1 gb:BC003795.1	393.5	179.1	0.000386472	0.455146	Sm22
1425519_a_at	gb:BC003476.1 /DB_XREF=gi:13097485 /FEA=FLmRNA /CNT=38 /TID=Mm.7043.1 /TIER=FL /STK=1 /UG=Mm.7043 /LL=16149 /UG_GENE=Ii /DEF=Mus musculus, clone MGC:6517 IMAGE:2650401, mRNA, complete cds. /PROD=Unknown (protein for MGC:6517) /FL=gb:BC003476.1	380.3	173.2	0.00153485	0.45543	Cd74
1451016_at	gb:BB540964 /DB_XREF=gi:9612187 /DB_XREF=BB540964 /CLONE=E130111G11 /FEA=FLmRNA /CNT=209 /TID=Mm.181740.1 /TIER=Stack /STK=11 /UG=Mm.181740 /LL=15983 /UG_GENE=Ifrd2 /UG_TITLE=interferon-related developmental regulator 2 /FL=gb:NM_025903.1	144.95	66.1	0.00345952	0.456019	Ifrd2
1423285_at	gb:BB731671 /DB_XREF=gi:16114946 /DB_XREF=BB731671 /CLONE=E970014B16 /FEA=FLmRNA /CNT=59 /TID=Mm.21325.1 /TIER=Stack /STK=18 /UG=Mm.21325 /LL=12810 /UG_GENE=Coch /UG_TITLE=coagulation factor C homolog (Limulus polyphemus) /FL=gb:AF006741.1 gb:NM_007728.1	255.1	117.6	0.00346302	0.460996	Coch
1418174_at	gb:BC018323.1 /DB_XREF=gi:17390756 /FEA=FLmRNA /CNT=100 /TID=Mm.3459.1 /TIER=FL+Stack /STK=28 /UG=Mm.3459 /LL=13170 /UG_GENE=Dbp /DEF=Mus musculus, D site albumin promoter binding protein, clone MGC:18803 IMAGE:4195116, mRNA, complete cds. /PROD=D site albumin promoter binding protein /FL=gb:NM_016974.1 gb:BC018323.1	2415.8	1115.7	0.00237054	0.461835	Dbp
1418722_at	gb:NM_008694.1 /DB_XREF=gi:6679053 /GEN=Ngp /FEA=FLmRNA /CNT=43 /TID=Mm.2827.1 /TIER=FL+Stack /STK=19 /UG=Mm.2827 /LL=18054 /DEF=Mus musculus neutrophilic granule protein (Ngp), mRNA. /PROD=neutrophilic granule protein /FL=gb:U95002.1 gb:NM_008694.1	166.55	76.95	0.00141758	0.462023	Ngp
1442066_at	gb:BB770053 /DB_XREF=gi:16212575 /DB_XREF=BB770053 /CLONE=G370103N08 /FEA=EST /CNT=9 /TID=Mm.211370.1 /TIER=ConsEnd /STK=3 /UG=Mm.211370 /UG_TITLE=ESTs, Weakly similar to R04E5.8.p (Caenorhabditis elegans) (C.elegans)	186.3	86.7	0.00702734	0.465378	Pianp
1429471_at	gb:AK003742.1 /DB_XREF=gi:12834597 /FEA=mRNA /CNT=23 /TID=Mm.45614.1 /TIER=Stack /STK=20 /UG=Mm.45614 /LL=73721 /UG_GENE=1110017D15Rik /UG_TITLE=RIKEN cDNA 1110017D15 gene /DEF=Mus musculus 18 days embryo whole body cDNA, RIKEN full-length enriched library, clone:1110017D15:hypothetical protein, full insert sequence.	391.2	182.8	0.00130977	0.46728	1110017D15Rik
1422723_at	gb:NM_009291.1 /DB_XREF=gi:6678170 /GEN=Stra6 /FEA=FLmRNA /CNT=32 /TID=Mm.10801.1 /TIER=FL+Stack /STK=16 /UG=Mm.10801 /LL=20897 /DEF=Mus musculus stimulated by retinoic acid gene 6 (Stra6), mRNA. /PROD=stimulated by retinoic acid gene 6 /FL=gb:NM_009291.1 gb:AF062476.1	215.65	101	0.0026061	0.468351	Stra6
1460036_at	gb:BE655707 /DB_XREF=gi:9981620 /DB_XREF=UI-M-BH0-ajq-a-12-0-UI.r1 /CLONE=UI-M-BH0-ajq-a-12-0-UI /FEA=EST /CNT=12 /TID=Mm.5342.1 /TIER=ConsEnd /STK=5 /UG=Mm.5342 /LL=102956 /UG_GENE=AI853648 /UG_TITLE=expressed sequence AI853648	481.15	227	0.00111005	0.471786	Ap1s2
1436057_at	gb:BM117428 /DB_XREF=gi:17080446 /DB_XREF=L0851E10-3 /CLONE=L0851E10 /FEA=EST /CNT=28 /TID=Mm.154560.2 /TIER=Stack /STK=11 /UG=Mm.154560 /LL=17263 /UG_GENE=Meg3 /UG_TITLE=maternally expressed gene 3	509.25	241	0.00171884	0.473245	Meg3
1418910_at	gb:NM_007557.1 /DB_XREF=gi:6680799 /GEN=Bmp7 /FEA=FLmRNA /CNT=35 /TID=Mm.595.1 /TIER=FL+Stack /STK=16 /UG=Mm.595 /LL=12162 /DEF=Mus musculus bone morphogenetic protein 7 (Bmp7), mRNA. /PROD=bone morphogenetic protein 7 /FL=gb:BC010771.1 gb:NM_007557.1	160.5	76	0.00286857	0.47352	Bmp7
1425592_at	gb:BC003275.1 /DB_XREF=gi:13096960 /FEA=FLmRNA /CNT=39 /TID=Mm.220357.1 /TIER=FL /STK=1 /UG=Mm.220357 /DEF=Mus musculus, Similar to karyopherin beta 2b, transportin, clone MGC:6380 IMAGE:3499838, mRNA, complete cds. /PROD=Similar to karyopherin beta 2b, transportin /FL=gb:BC003275.1	161.7	76.6	0.00483843	0.473717	Tnpo2
1456823_at	gb:AV274491 /DB_XREF=gi:15405591 /DB_XREF=AV274491 /CLONE=4932419B04 /FEA=EST /CNT=7 /TID=Mm.67696.1 /TIER=ConsEnd /STK=7 /UG=Mm.67696 /UG_TITLE=ESTs	211.7	100.9	0.00693623	0.476618	Ppp1r36
1418842_at	gb:NM_008225.1 /DB_XREF=gi:6680186 /GEN=Hcls1 /FEA=FLmRNA /CNT=45 /TID=Mm.4091.1 /TIER=FL+Stack /STK=17 /UG=Mm.4091 /LL=15163 /DEF=Mus musculus hematopoietic cell specific Lyn substrate 1 (Hcls1), mRNA. /PROD=hematopoietic cell specific Lyn substrate 1 /FL=gb:D42120.1 gb:NM_008225.1 gb:BC007469.1	110.55	53.3	0.00636476	0.482135	Hcls1
1435704_at	gb:BB552195 /DB_XREF=gi:16448133 /DB_XREF=BB552195 /CLONE=E230035G13 /FEA=EST /CNT=18 /TID=Mm.32850.1 /TIER=Stack /STK=14 /UG=Mm.32850 /UG_TITLE=ESTs, Weakly similar to H Chain H, Human Glutathione Transferase A4-4 Complex With Iodobenzyl Glutathione (H.sapiens)	250.35	120.95	0.00225257	0.483124	C920006O11Rik
1418508_a_at	gb:NM_008163.1 /DB_XREF=gi:6680082 /GEN=Grb2 /FEA=FLmRNA /CNT=173 /TID=Mm.6900.1 /TIER=FL+Stack /STK=22 /UG=Mm.6900 /LL=14784 /DEF=Mus musculus growth factor receptor bound protein 2 (Grb2), mRNA. /PROD=growth factor receptor bound protein 2 /FL=gb:NM_008163.1 gb:U07617.1	1325.1	642.95	0.00636686	0.485209	Grb2
1452183_a_at	gb:Y13832.1 /DB_XREF=gi:2739299 /FEA=mRNA /CNT=128 /TID=Mm.154560.1 /TIER=Stack /STK=74 /UG=Mm.154560 /LL=17263 /UG_GENE=Meg3 /UG_TITLE=maternally expressed gene 3 /DEF=Mus musculus mRNA for GT12 protein.	2193.65	1069.75	0.000763681	0.487658	Meg3
1452924_at	gb:BF730742 /DB_XREF=gi:12048606 /DB_XREF=mab68g02.x1 /CLONE=IMAGE:3975722 /FEA=mRNA /CNT=100 /TID=Mm.85162.1 /TIER=Stack /STK=19 /UG=Mm.85162 /LL=71878 /UG_GENE=2310007D09Rik /UG_TITLE=RIKEN cDNA 2310007D09 gene	104.7	51.1	0.00765605	0.488061	Fam83d
1431780_at	gb:AK006216.1 /DB_XREF=gi:12839193 /FEA=mRNA /CNT=2 /TID=Mm.158276.1 /TIER=ConsEnd /STK=0 /UG=Mm.158276 /LL=69398 /UG_GENE=1700021K14Rik /UG_TITLE=RIKEN cDNA 1700021K14 gene /DEF=Mus musculus adult male testis cDNA, RIKEN full-length enriched library, clone:1700021K14:hypothetical protein, full insert sequence.	172.45	84.2	0.000381225	0.488257	Cdhr4
1449340_at	gb:AK007893.1 /DB_XREF=gi:12841739 /FEA=FLmRNA /CNT=73 /TID=Mm.43375.1 /TIER=Stack /STK=16 /UG=Mm.43375 /LL=66042 /UG_GENE=0610006G05Rik /UG_TITLE=RIKEN cDNA 0610006G05 gene /DEF=Mus musculus 10 day old male pancreas cDNA, RIKEN full-length enriched library, clone:1810057P14:homolog to HYPOTHETICAL 15.3 KDA PROTEIN (FRAGMENT), full insert sequence. /FL=gb:BC021458.1 gb:NM_025312.1	1208	592.15	0.00181613	0.49019	Sostdc1
1417680_at	gb:NM_008419.1 /DB_XREF=gi:6680517 /GEN=Kcna5 /FEA=FLmRNA /CNT=47 /TID=Mm.1241.1 /TIER=FL+Stack /STK=39 /UG=Mm.1241 /LL=16493 /DEF=Mus musculus potassium voltage-gated channel, shaker-related subfamily, member 5 (Kcna5), mRNA. /PROD=potassium voltage-gated channel, shaker-relatedsubfamily, member 5 /FL=gb:BC021787.1 gb:AF108659.1 gb:NM_008419.1 gb:L22218.1	245.6	120.45	0.00801213	0.490432	Kcna5
1435188_at	gb:BB407125 /DB_XREF=gi:15411886 /DB_XREF=BB407125 /CLONE=C330049K02 /FEA=EST /CNT=29 /TID=Mm.17668.1 /TIER=Stack /STK=19 /UG=Mm.17668 /UG_TITLE=ESTs	511.25	252.55	0.00220932	0.493985	Gm129
1428173_at	gb:AK005562.1 /DB_XREF=gi:12838201 /FEA=mRNA /CNT=89 /TID=Mm.154121.1 /TIER=Stack /STK=82 /UG=Mm.154121 /LL=72205 /UG_GENE=1600029N02Rik /UG_TITLE=RIKEN cDNA 1600029N02 gene /DEF=Mus musculus adult female placenta cDNA, RIKEN full-length enriched library, clone:1600029N02:homolog to ECHINODERM MICROTUBULE-ASSOCIATED PROTEIN-LIKE EMAP2, full insert sequence.	1296.25	645.65	0.00207232	0.498091	Eml2
1452905_at	gb:AV015833 /DB_XREF=gi:4792825 /DB_XREF=AV015833 /CLONE=1110061M07 /FEA=mRNA /CNT=133 /TID=Mm.41602.1 /TIER=Stack /STK=11 /UG=Mm.41602 /LL=67301 /UG_GENE=3110050O07Rik /UG_TITLE=RIKEN cDNA 3110050O07 gene	1763.85	880.95	0.00258905	0.499447	Meg3
1451527_at	gb:AF352788.1 /DB_XREF=gi:19070656 /GEN=Pcolce2 /FEA=FLmRNA /CNT=40 /TID=Mm.46016.1 /TIER=FL+Stack /STK=12 /UG=Mm.46016 /LL=76477 /DEF=Mus musculus procollagen COOH-terminal proteinase enhancer protein 2 (Pcolce2) mRNA, complete cds. /PROD=procollagen COOH-terminal proteinase enhancerprotein 2 /FL=gb:AF352788.1	599.15	299.35	0.00120386	0.499624	Pcolce2
