# Supplementary material for: ACE Inhibition with Captopril Retards the Development of Signs of Neurodegeneration in an Animal Model of Alzheimer’s Disease
Source: Int J Mol Sci. 2013 Aug 16;14(8):16917–42. doi: 10.3390/ijms140816917 (PMC3759943; doi:10.3390/ijms140816917)
Supplement: Supplementary File 3 — Supplementary3 (XLS, 2182 KB) [file ijms-14-16917-s003.xls]

## Sheet: Blatt1
Table S3. Significantly increased hippocampal probe sets (P≤0.01, just alpha, no false discovery correction, and ≥2-fold difference) of untreated 12 month-old Tg2576 mice (Tg-12mo) compared to untreated 18 month-old Tg2576 mice (Tg-18mo).
Affymetrix-ID	Descriptions	mean Tg-18mo	mean Tg-12mo	Raw p value	Fold change (Tg-12mo/Tg-18mo)	Gene name
1435521_at	gb:BQ174527 /DB_XREF=gi:20350018 /DB_XREF=UI-M-DJ2-bvy-k-08-0-UI.s1 /CLONE=UI-M-DJ2-bvy-k-08-0-UI /FEA=EST /CNT=101 /TID=Mm.35930.1 /TIER=Stack /STK=60 /UG=Mm.35930 /LL=103787 /UG_GENE=AI563628 /UG_TITLE=expressed sequence AI563628	156.7	987.1	0.00209311	6.2993	Msi2
1442867_at	gb:BQ174216 /DB_XREF=gi:20349707 /DB_XREF=UI-M-DJ2-bvw-m-07-0-UI.s1 /CLONE=UI-M-DJ2-bvw-m-07-0-UI /FEA=EST /CNT=4 /TID=Mm.194351.1 /TIER=ConsEnd /STK=3 /UG=Mm.194351 /UG_TITLE=ESTs	99.2	546.95	0.00374058	5.51361	Megf11
1436981_a_at	gb:BB706206 /DB_XREF=gi:16055041 /DB_XREF=BB706206 /CLONE=7420487L24 /FEA=EST /CNT=38 /TID=Mm.3360.4 /TIER=ConsEnd /STK=0 /UG=Mm.3360 /LL=22631 /UG_GENE=Ywhaz /UG_TITLE=tyrosine 3-monooxygenasetryptophan 5-monooxygenase activation protein, zeta polypeptide	230.45	1233.75	0.00279016	5.35366	Ywhaz
1420402_at	gb:NM_009723.1 /DB_XREF=gi:6753139 /GEN=Atp2b2 /FEA=FLmRNA /CNT=26 /TID=Mm.20441.1 /TIER=FL /STK=5 /UG=Mm.20441 /LL=11941 /DEF=Mus musculus ATPase, Ca++ transporting, plasma membrane 2 (Atp2b2), mRNA. /PROD=ATPase, Ca++ transporting, plasma membrane 2 /FL=gb:AF053471.1 gb:NM_009723.1 gb:AB030738.1 gb:AB030737.1	517.8	2565.7	0.000585672	4.955	Atp2b2
1447763_at	gb:AV160090 /DB_XREF=gi:5403725 /DB_XREF=AV160090 /CLONE=3010040M24 /FEA=EST /CNT=2 /TID=Mm.45283.1 /TIER=ConsEnd /STK=2 /UG=Mm.45283 /UG_TITLE=ESTs	468.15	2184.4	0.0016003	4.66603	Snap25
1449772_at	gb:C77429 /DB_XREF=gi:2517759 /DB_XREF=C77429 /CLONE=J0030H04 /FEA=EST /CNT=1 /TID=Mm.206807.1 /TIER=ConsEnd /STK=0 /UG=Mm.206807 /LL=52218 /UG_GENE=D5Ertd110e /UG_TITLE=DNA segment, Chr 5, ERATO Doi 110, expressed	41.25	186.25	0.000907396	4.51515	Tbc1d14
1426114_at	gb:L36663.1 /DB_XREF=gi:840647 /FEA=FLmRNA /CNT=1 /TID=MmAffx.1.19 /TIER=FL /STK=1 /NOTE=sequence(s) not in UniGene /DEF=Mus musculus CArG box-binding factor mRNA, complete cds. /PROD=CArG box-binding factor /FL=gb:L36663.1	2549.95	11374.6	0.000119615	4.4607	Hnrnpab
1447869_x_at	gb:AV047988 /DB_XREF=gi:4867653 /DB_XREF=AV047988 /CLONE=1700072E02 /FEA=EST /CNT=2 /TID=Mm.84884.1 /TIER=ConsEnd /STK=2 /UG=Mm.84884 /UG_TITLE=ESTs, Moderately similar to KIAA0878 protein (H.sapiens)	40.45	176.6	0.00122609	4.36588	Rhobtb3
1435129_at	gb:AW495875 /DB_XREF=gi:7066156 /DB_XREF=up47g06.x1 /CLONE=IMAGE:2749306 /FEA=EST /CNT=20 /TID=Mm.6355.2 /TIER=Stack /STK=20 /UG=Mm.6355 /LL=19244 /UG_GENE=Ptp4a2 /UG_TITLE=protein tyrosine phosphatase 4a2	1992.65	8239.2	0.000532143	4.1348	Ptp4a2
1415824_at	gb:BG060909 /DB_XREF=gi:12529872 /DB_XREF=L0900C01-5 /CLONE=L0900C01 /FEA=FLmRNA /CNT=525 /TID=Mm.193096.1 /TIER=Stack /STK=13 /UG=Mm.193096 /LL=20250 /UG_GENE=Scd2 /UG_TITLE=stearoyl-Coenzyme A desaturase 2 /FL=gb:NM_009128.1 gb:M26270.1	878.45	3628.9	0.000482344	4.13103	Scd2
1441728_at	gb:BI731739 /DB_XREF=gi:15708752 /DB_XREF=603353512F1 /CLONE=IMAGE:5361050 /FEA=EST /CNT=4 /TID=Mm.206118.1 /TIER=ConsEnd /STK=4 /UG=Mm.206118 /UG_TITLE=ESTs, Moderately similar to voltage gated Na channel Scn8a (M.musculus)	79.1	316.75	0.00116196	4.00442	Scn1a
1457800_at	gb:AW122190 /DB_XREF=gi:6097643 /DB_XREF=UI-M-BH2.2-aov-b-01-0-UI.s1 /CLONE=UI-M-BH2.2-aov-b-01-0-UI /FEA=EST /CNT=5 /TID=Mm.150668.1 /TIER=ConsEnd /STK=3 /UG=Mm.150668 /UG_TITLE=ESTs	313.6	1255.45	0.00247688	4.00335	UI-M-BH2.2-aov-b-01-0-UI.s1
1448793_a_at	gb:BC005679.1 /DB_XREF=gi:13542989 /FEA=FLmRNA /CNT=177 /TID=Mm.3815.1 /TIER=FL+Stack /STK=16 /UG=Mm.3815 /LL=20971 /UG_GENE=Sdc4 /DEF=Mus musculus, syndecan 4, clone MGC:11456 IMAGE:3154160, mRNA, complete cds. /PROD=syndecan 4 /FL=gb:D89571.1 gb:NM_011521.1 gb:BC005679.1	1202.5	4719.9	0.000780107	3.92507	Sdc4
1450035_a_at	gb:BG064340 /DB_XREF=gi:12546903 /DB_XREF=H3018D11-3 /CLONE=H3018D11 /FEA=FLmRNA /CNT=123 /TID=Mm.87658.1 /TIER=Stack /STK=42 /UG=Mm.87658 /LL=56194 /UG_GENE=Fnbp3 /UG_TITLE=formin binding protein 3 /FL=gb:AF135439.1 gb:NM_018785.1	89.8	346.3	0.00933241	3.85635	Fnbp3
1436850_at	gb:AV338277 /DB_XREF=gi:16396655 /DB_XREF=AV338277 /CLONE=6430408F09 /FEA=EST /CNT=85 /TID=Mm.122091.1 /TIER=Stack /STK=43 /UG=Mm.122091 /UG_TITLE=ESTs, Weakly similar to cellular repressor of E1A-stimulated genes (Mus musculus) (M.musculus)	100.6	383.9	0.00329988	3.8161	Creg2
1438908_at	gb:BB370469 /DB_XREF=gi:16406877 /DB_XREF=BB370469 /CLONE=C130053H06 /FEA=EST /CNT=9 /TID=Mm.111.4 /TIER=Stack /STK=9 /UG=Mm.111 /LL=18521 /UG_GENE=Pcbp2 /UG_TITLE=poly(rC) binding protein 2	128.85	482.8	0.00598328	3.74699	Pcbp2
1451696_at	gb:BC004695.1 /DB_XREF=gi:13435647 /FEA=FLmRNA /CNT=4 /TID=Mm.2095.2 /TIER=FL /STK=2 /UG=Mm.2095 /LL=22722 /UG_GENE=Zfp64 /DEF=Mus musculus, Similar to zinc finger protein 64, clone MGC:5897 IMAGE:3498906, mRNA, complete cds. /PROD=Similar to zinc finger protein 64 /FL=gb:BC004695.1	62.5	231.9	0.00361709	3.7104	Zfp64
1437729_at	gb:BG141806 /DB_XREF=gi:12645201 /DB_XREF=ia94e01.x1 /CLONE=IMAGE:5646025 /FEA=EST /CNT=122 /TID=Mm.142380.7 /TIER=Stack /STK=14 /UG=Mm.142380 /LL=26451 /UG_GENE=Rpl27a /UG_TITLE=ribosomal protein L27a	259.05	945.4	0.000250015	3.64949	Rpl27a
1453578_at	gb:BM939099 /DB_XREF=gi:19398251 /DB_XREF=UI-M-BZ1-bkc-c-08-0-UI.r1 /CLONE=UI-M-BZ1-bkc-c-08-0-UI /FEA=mRNA /CNT=20 /TID=Mm.81159.2 /TIER=ConsEnd /STK=1 /UG=Mm.81159 /LL=68921 /UG_GENE=1110065A22Rik /UG_TITLE=RIKEN cDNA 1110065A22 gene	162.5	587.25	0.00403113	3.61385	Pter
1419413_at	gb:NM_011332.1 /DB_XREF=gi:7549784 /GEN=Scya17 /FEA=FLmRNA /CNT=14 /TID=Mm.41988.1 /TIER=FL+Stack /STK=10 /UG=Mm.41988 /LL=20295 /DEF=Mus musculus small inducible cytokine subfamily A17 (Scya17), mRNA. /PROD=small inducible cytokine subfamily A17 /FL=gb:NM_011332.1 gb:AF125572.1 gb:AF125571.1 gb:AF125570.1	86.95	311.65	0.00604739	3.58424	Scya17
1439005_x_at	gb:BG968903 /DB_XREF=gi:14356540 /DB_XREF=602836072F1 /CLONE=IMAGE:4990697 /FEA=EST /CNT=48 /TID=Mm.3360.7 /TIER=ConsEnd /STK=0 /UG=Mm.3360 /LL=22631 /UG_GENE=Ywhaz /UG_TITLE=tyrosine 3-monooxygenasetryptophan 5-monooxygenase activation protein, zeta polypeptide	677.65	2416.2	0.00523772	3.56556	Ywhaz
1421163_a_at	gb:NM_010905.1 /DB_XREF=gi:6754835 /GEN=Nfia /FEA=FLmRNA /CNT=14 /TID=Mm.4771.1 /TIER=FL /STK=1 /UG=Mm.4771 /LL=18027 /DEF=Mus musculus nuclear factor IA (Nfia), mRNA. /PROD=nuclear factor IA /FL=gb:AF326554.1 gb:AF326553.1 gb:NM_010905.1	303.65	1082.5	0.00668386	3.56496	Nfia
1430073_at	gb:BB767924 /DB_XREF=gi:16210502 /DB_XREF=BB767924 /CLONE=G370079K13 /FEA=mRNA /CNT=6 /TID=Mm.154106.1 /TIER=ConsEnd /STK=4 /UG=Mm.154106 /LL=67262 /UG_GENE=2900016B01Rik /UG_TITLE=RIKEN cDNA 2900016B01 gene	311	1099.7	0.000670496	3.53601	Kbtbd11
1419034_at	gb:NM_007788.1 /DB_XREF=gi:7106274 /GEN=Csnk2a1-rs4 /FEA=FLmRNA /CNT=162 /TID=Mm.23692.1 /TIER=FL+Stack /STK=14 /UG=Mm.23692 /LL=12999 /DEF=Mus musculus casein kinase II, alpha 1 related sequence 4 (Csnk2a1-rs4), mRNA. /PROD=casein kinase II, alpha 1 related sequence 4 /FL=gb:NM_007788.1 gb:U51866.1 gb:BC026149.1	130.85	453.1	0.00253538	3.46274	Csnk2a1
1437801_at	gb:BM115860 /DB_XREF=gi:17078878 /DB_XREF=L0826E05-3 /CLONE=L0826E05 /FEA=EST /CNT=15 /TID=Mm.196508.8 /TIER=Stack /STK=14 /UG=Mm.196508 /LL=21761 /UG_GENE=Tex189 /UG_TITLE=testis expressed gene 189	1886.05	6523.3	0.00611327	3.45871	Morf4l1
1456120_at	gb:BB427489 /DB_XREF=gi:16423817 /DB_XREF=BB427489 /CLONE=C630011I23 /FEA=EST /CNT=23 /TID=Mm.183116.2 /TIER=Stack /STK=15 /UG=Mm.183116 /LL=66961 /UG_GENE=2310043N10Rik /UG_TITLE=RIKEN cDNA 2310043N10 gene	320.95	1108.95	0.00100833	3.45521	Secisbp2l
1430561_at	gb:BE952491 /DB_XREF=gi:10592997 /DB_XREF=UI-M-CE0-azc-d-08-0-UI.s1 /CLONE=UI-M-CE0-azc-d-08-0-UI /FEA=mRNA /CNT=28 /TID=Mm.30934.1 /TIER=ConsEnd /STK=1 /UG=Mm.30934 /LL=70604 /UG_GENE=5730496F10Rik /UG_TITLE=RIKEN cDNA 5730496F10 gene	735.9	2478.85	0.00159677	3.36846	Dnajb14
1430286_s_at	gb:AK013448.1 /DB_XREF=gi:12850809 /FEA=mRNA /CNT=4 /TID=Mm.45223.1 /TIER=ConsEnd /STK=3 /UG=Mm.45223 /LL=72819 /UG_GENE=2810487F15Rik /UG_TITLE=RIKEN cDNA 2810487F15 gene /DEF=Mus musculus 10, 11 days embryo whole body cDNA, RIKEN full-length enriched library, clone:2810487F15:homolog to SEROLOGICALLY DEFINED BREAST CANCER ANTIGEN NY-BR-81 (FRAGMENT), full insert sequence.	153.5	497.45	0.00178112	3.24072	Gm14057
1443826_x_at	gb:BB269348 /DB_XREF=gi:8965818 /DB_XREF=BB269348 /CLONE=A830039I22 /FEA=EST /CNT=3 /TID=Mm.166390.1 /TIER=ConsEnd /STK=3 /UG=Mm.166390 /UG_TITLE=ESTs	59.9	191.85	0.00748805	3.20284	BB269348
1455960_at	gb:BB483642 /DB_XREF=gi:16441063 /DB_XREF=BB483642 /CLONE=D430021H18 /FEA=EST /CNT=44 /TID=Mm.28686.3 /TIER=Stack /STK=22 /UG=Mm.28686 /UG_TITLE=ESTs, Weakly similar to LMA1 MOUSE LAMININ ALPHA-1 CHAIN PRECURSOR (M.musculus)	127	406.4	0.00416504	3.2	Megf9
1440801_s_at	gb:BB391602 /DB_XREF=gi:9114556 /DB_XREF=BB391602 /CLONE=C230075D03 /FEA=EST /CNT=5 /TID=Mm.133170.1 /TIER=ConsEnd /STK=5 /UG=Mm.133170 /UG_TITLE=ESTs, Weakly similar to BETA-ADRENERGIC RECEPTOR KINASE 2 (R.norvegicus)	736.8	2351.75	0.00144998	3.19184	BB391602
1420487_at	gb:AW060738 /DB_XREF=gi:6008489 /DB_XREF=UI-M-BH1-anu-a-12-0-UI.s1 /CLONE=UI-M-BH1-anu-a-12-0-UI /FEA=FLmRNA /CNT=116 /TID=Mm.142195.1 /TIER=ConsEnd /STK=1 /UG=Mm.142195 /LL=70078 /UG_GENE=2210008F15Rik /UG_TITLE=RIKEN cDNA 2210008F15 gene /FL=gb:NM_023554.1	209.45	661.35	0.000828924	3.15756	Nol7
1439578_at	gb:BB713457 /DB_XREF=gi:16066626 /DB_XREF=BB713457 /CLONE=B020047A14 /FEA=EST /CNT=9 /TID=Mm.219133.1 /TIER=ConsEnd /STK=7 /UG=Mm.219133 /UG_TITLE=ESTs	160.15	500.35	0.00777153	3.12426	Lsm11
1456863_at	gb:AI385584 /DB_XREF=gi:4199047 /DB_XREF=mb18d08.x1 /CLONE=IMAGE:329775 /FEA=EST /CNT=7 /TID=Mm.200233.1 /TIER=ConsEnd /STK=7 /UG=Mm.200233 /LL=98323 /UG_GENE=AI385584 /UG_TITLE=expressed sequence AI385584	97.7	305.15	0.00200537	3.12334	Epha4
1456084_x_at	gb:BB532202 /DB_XREF=gi:9584131 /DB_XREF=BB532202 /CLONE=E030022M17 /FEA=EST /CNT=17 /TID=Mm.41573.6 /TIER=Stack /STK=17 /UG=Mm.41573 /LL=14264 /UG_GENE=Fmod /UG_TITLE=fibromodulin	621.75	1941.3	8.44671e-05	3.12232	Fmod
1447862_x_at	gb:BB233297 /DB_XREF=gi:8913152 /DB_XREF=BB233297 /CLONE=A630042N23 /FEA=EST /CNT=2 /TID=Mm.136833.1 /TIER=ConsEnd /STK=2 /UG=Mm.136833 /UG_TITLE=ESTs	103	316	0.00120686	3.06796	Thbs2
1423184_at	gb:AI326108 /DB_XREF=gi:4060537 /DB_XREF=mq68d05.x1 /CLONE=IMAGE:583881 /FEA=FLmRNA /CNT=95 /TID=Mm.40285.1 /TIER=Stack /STK=15 /UG=Mm.40285 /LL=20403 /UG_GENE=Sh3d1B /UG_TITLE=SH3 domain protein 1B /FL=gb:AF132480.1 gb:AF132479.1 gb:NM_011365.1	44.3	135.2	0.0042579	3.05192	Itsn2
1449676_at	gb:C80220 /DB_XREF=gi:2520550 /DB_XREF=C80220 /CLONE=J0078C04 /FEA=EST /CNT=1 /TID=Mm.206835.1 /TIER=ConsEnd /STK=0 /UG=Mm.206835 /LL=93773 /UG_GENE=C80220 /UG_TITLE=EST C80220	308.7	925.9	0.0053062	2.99935	Rab2a
1418431_at	gb:BI328541 /DB_XREF=gi:15013198 /DB_XREF=602985332F1 /CLONE=IMAGE:5138167 /FEA=FLmRNA /CNT=397 /TID=Mm.3380.1 /TIER=Stack /STK=11 /UG=Mm.3380 /LL=16573 /UG_GENE=Kif5b /UG_TITLE=kinesin family member 5B /FL=gb:NM_008448.1 gb:U86090.1	441.05	1309.55	0.00396548	2.96916	Kif5b
1439272_at	gb:BB183240 /DB_XREF=gi:16270218 /DB_XREF=BB183240 /CLONE=A230105F24 /FEA=EST /CNT=20 /TID=Mm.32012.3 /TIER=Stack /STK=8 /UG=Mm.32012 /LL=54392 /UG_GENE=Hcapg-pending /UG_TITLE=chromosome condensation protein G	239.75	704.2	0.00856751	2.93723	Lcorl
1452722_a_at	gb:BB702110 /DB_XREF=gi:16050934 /DB_XREF=BB702110 /CLONE=7420437M16 /FEA=mRNA /CNT=238 /TID=Mm.46579.1 /TIER=Stack /STK=62 /UG=Mm.46579 /LL=75717 /UG_GENE=4921514I20Rik /UG_TITLE=RIKEN cDNA 4921514I20 gene	147.5	430.65	0.00588785	2.91966	Cul5
1444128_at	gb:AI447325 /DB_XREF=gi:4303200 /DB_XREF=mr05c09.x1 /CLONE=IMAGE:596560 /FEA=EST /CNT=5 /TID=Mm.133197.1 /TIER=ConsEnd /STK=2 /UG=Mm.133197 /UG_TITLE=ESTs	62.25	181.55	0.0028353	2.91647	Arhgap26
1421754_at	gb:NM_133243.1 /DB_XREF=gi:18875413 /GEN=AY036118 /FEA=FLmRNA /CNT=2 /TID=MmAffx.1.3 /TIER=FL /STK=2 /NOTE=sequence(s) not in UniGene /DEF=Mus musculus cDNA sequence AY036118 (AY036118), mRNA. /PROD=cDNA sequence AY036118 /FL=gb:AY036118.1 gb:NM_133243.1	1462.7	4255.5	0.000878327	2.90935	AY036118
1418018_at	gb:NM_007754.1 /DB_XREF=gi:6681000 /GEN=Cpd /FEA=FLmRNA /CNT=113 /TID=Mm.20910.1 /TIER=FL+Stack /STK=31 /UG=Mm.20910 /LL=12874 /DEF=Mus musculus carboxypeptidase D (Cpd), mRNA. /PROD=carboxypeptidase D /FL=gb:NM_007754.1 gb:D85391.1	420.25	1216.1	0.00582194	2.89375	Cpd
1439300_at	gb:BG065782 /DB_XREF=gi:12548345 /DB_XREF=H3035C01-3 /CLONE=H3035C01 /FEA=EST /CNT=8 /TID=Mm.132500.1 /TIER=Stack /STK=8 /UG=Mm.132500 /UG_TITLE=ESTs	333.35	960.95	0.00147038	2.88271	Brx
1439940_at	gb:AV328280 /DB_XREF=gi:15406324 /DB_XREF=AV328280 /CLONE=6330440N14 /FEA=EST /CNT=7 /TID=Mm.44658.1 /TIER=ConsEnd /STK=6 /UG=Mm.44658 /UG_TITLE=ESTs	2005.15	5778.6	0.00490629	2.88188	Slc1a2
1439605_at	gb:BB464198 /DB_XREF=gi:16426978 /DB_XREF=BB464198 /CLONE=D130086J20 /FEA=EST /CNT=8 /TID=Mm.101451.1 /TIER=ConsEnd /STK=7 /UG=Mm.101451 /UG_TITLE=ESTs	87.95	253.35	0.00279552	2.88061	BB464198
1423194_at	gb:BB823029 /DB_XREF=gi:17001272 /DB_XREF=BB823029 /CLONE=G830025J04 /FEA=FLmRNA /CNT=161 /TID=Mm.35059.1 /TIER=Stack /STK=19 /UG=Mm.35059 /LL=11855 /UG_GENE=Arhgap5 /UG_TITLE=Rho GTPase activating protein 5 /FL=gb:NM_009706.1	300.25	862.55	0.000229541	2.87277	Arhgap5
1418469_at	gb:AV272221 /DB_XREF=gi:16390145 /DB_XREF=AV272221 /CLONE=4931421O04 /FEA=FLmRNA /CNT=78 /TID=Mm.20895.1 /TIER=Stack /STK=8 /UG=Mm.20895 /LL=18184 /UG_GENE=Nrip1 /UG_TITLE=nuclear receptor interacting protein 1 /FL=gb:NM_008735.1 gb:AF053062.1	287.15	824.3	0.00538833	2.87063	Nrip1
1446065_at	gb:AW557538 /DB_XREF=gi:7202967 /DB_XREF=L0283B06-3 /CLONE=L0283B06 /FEA=EST /CNT=2 /TID=Mm.182838.1 /TIER=ConsEnd /STK=2 /UG=Mm.182838 /UG_TITLE=ESTs	49.95	143.15	0.00217661	2.86587	L0283B06-3
1438441_at	gb:AI323288 /DB_XREF=gi:4057717 /DB_XREF=mg99h04.x1 /CLONE=IMAGE:441175 /FEA=EST /CNT=24 /TID=Mm.28223.4 /TIER=Stack /STK=10 /UG=Mm.28223 /LL=15904 /UG_GENE=Idb4 /UG_TITLE=inhibitor of DNA binding 4	319.5	910.05	0.000927876	2.84836	Id4
1460613_x_at	gb:BB026315 /DB_XREF=gi:8202262 /DB_XREF=BB026315 /CLONE=5330432I06 /FEA=EST /CNT=41 /TID=Mm.1240.4 /TIER=Stack /STK=41 /UG=Mm.1240 /LL=14599 /UG_GENE=Gh /UG_TITLE=growth hormone	51.75	147.05	0.00380609	2.84155	Gh
1442027_at	gb:BB223743 /DB_XREF=gi:16353817 /DB_XREF=BB223743 /CLONE=A530083I02 /FEA=EST /CNT=10 /TID=Mm.77731.1 /TIER=ConsEnd /STK=3 /UG=Mm.77731 /UG_TITLE=ESTs, Weakly similar to FAN MOUSE PROTEIN FAN (M.musculus)	166.05	466.6	0.00316669	2.81	Nbeal1
1422553_at	gb:NM_008960.1 /DB_XREF=gi:6679522 /GEN=Pten /FEA=FLmRNA /CNT=146 /TID=Mm.1591.1 /TIER=FL+Stack /STK=37 /UG=Mm.1591 /LL=19211 /DEF=Mus musculus phosphatase and tensin homolog (Pten), mRNA. /PROD=phosphatase and tensin homolog /FL=gb:BC021445.1 gb:NM_008960.1 gb:U92437.1	1013.2	2828.25	0.000405744	2.7914	Pten
1425597_a_at	gb:AW060288 /DB_XREF=gi:6008004 /DB_XREF=UI-M-BH1-amv-b-05-0-UI.s1 /CLONE=UI-M-BH1-amv-b-05-0-UI /FEA=FLmRNA /CNT=22 /TID=Mm.2655.3 /TIER=Stack /STK=10 /UG=Mm.2655 /LL=19317 /UG_GENE=qk /UG_TITLE=quaking /FL=gb:U44940.1	281.05	782.05	0.00713168	2.7826	Qk
1456398_at	gb:BB648848 /DB_XREF=gi:16483103 /DB_XREF=BB648848 /CLONE=C130040L09 /FEA=EST /CNT=19 /TID=Mm.18728.2 /TIER=Stack /STK=10 /UG=Mm.18728 /LL=103674 /UG_GENE=AI316828 /UG_TITLE=expressed sequence AI316828	363.55	1004.35	0.0028458	2.76262	Tug1
1427820_at	gb:BC021831.1 /DB_XREF=gi:18256103 /FEA=mRNA /CNT=1 /TID=Mm.218360.1 /TIER=ConsEnd /STK=0 /UG=Mm.218360 /DEF=Mus musculus, clone IMAGE:3983821, mRNA, partial cds. /PROD=Unknown (protein for IMAGE:3983821)	594.75	1633.05	3.5364e-06	2.74578	BC021831
1438403_s_at	gb:BF537798 /DB_XREF=gi:11625166 /DB_XREF=602053404F1 /CLONE=IMAGE:4192561 /FEA=EST /CNT=31 /TID=Mm.218611.2 /TIER=Stack /STK=10 /UG=Mm.218611 /LL=54409 /UG_GENE=Ramp2 /UG_TITLE=receptor (calcitonin) activity modifying protein 2	904.3	2445.35	0.00631901	2.70414	Malat1
1438966_x_at	gb:AV290700 /DB_XREF=gi:6304731 /DB_XREF=AV290700 /CLONE=5230401E10 /FEA=EST /CNT=9 /TID=Mm.41573.11 /TIER=Stack /STK=9 /UG=Mm.41573 /LL=14264 /UG_GENE=Fmod /UG_TITLE=fibromodulin	119.5	323.05	0.00366048	2.70335	Fmod
1437120_at	gb:BB320376 /DB_XREF=gi:16403306 /DB_XREF=BB320376 /CLONE=B230385I08 /FEA=EST /CNT=36 /TID=Mm.29971.2 /TIER=Stack /STK=25 /UG=Mm.29971 /LL=67804 /UG_GENE=Snx2 /UG_TITLE=sorting nexin 2	283.55	760.05	0.0032027	2.68048	Snx2
1449703_at	gb:AU016206 /DB_XREF=gi:3371210 /DB_XREF=AU016206 /CLONE=J0722A09 /FEA=EST /CNT=1 /TID=Mm.207273.1 /TIER=ConsEnd /STK=0 /UG=Mm.207273 /LL=100795 /UG_GENE=AU016206 /UG_TITLE=expressed sequence AU016206	47.45	126.4	0.00686629	2.66386	Zfand2a
1424077_at	gb:AK016023.1 /DB_XREF=gi:12854600 /FEA=FLmRNA /CNT=145 /TID=Mm.7775.1 /TIER=Stack /STK=38 /UG=Mm.7775 /LL=66569 /UG_GENE=2610020H15Rik /UG_TITLE=RIKEN cDNA 2610020H15 gene /DEF=Mus musculus adult male testis cDNA, RIKEN full-length enriched library, clone:4930542N03:homolog to CDNA: FLJ22603 FIS, CLONE HSI04564 (UNKNOWN) (PROTEIN FOR MGC:4171), full insert sequence. /FL=gb:BC016541.1	748.35	1985.35	0.000539006	2.65297	Gdpd1
1428045_a_at	gb:BC027739.1 /DB_XREF=gi:20381200 /FEA=mRNA /CNT=2 /TID=Mm.46503.4 /TIER=ConsEnd /STK=0 /UG=Mm.46503 /LL=69257 /UG_GENE=2610036A20Rik /UG_TITLE=RIKEN cDNA 2610036A20 gene /DEF=Mus musculus, Similar to RIKEN cDNA 2610036A20 gene, clone IMAGE:5009479, mRNA.	89.15	236	0.00614104	2.64722	Elf2
1419038_a_at	gb:BB283759 /DB_XREF=gi:8984208 /DB_XREF=BB283759 /CLONE=A930103E12 /FEA=FLmRNA /CNT=162 /TID=Mm.23692.1 /TIER=Stack /STK=8 /UG=Mm.23692 /LL=12999 /UG_GENE=Csnk2a1-rs4 /UG_TITLE=casein kinase II, alpha 1 related sequence 4 /FL=gb:NM_007788.1 gb:U51866.1 gb:BC026149.1	870.4	2290.3	0.00174399	2.63132	Csnk2a1
1451569_at	gb:AU066920 /DB_XREF=gi:4967657 /DB_XREF=AU066920 /CLONE=MNCb-2722 /FEA=FLmRNA /CNT=73 /TID=Mm.3535.1 /TIER=Stack /STK=30 /UG=Mm.3535 /LL=22026 /UG_GENE=Nr2c2 /UG_TITLE=nuclear receptor subfamily 2, group C, member 2 /FL=gb:U11688.1	329.95	867.7	0.00132902	2.62979	Nr2c2
1456119_at	gb:AV334671 /DB_XREF=gi:16396307 /DB_XREF=AV334671 /CLONE=6330563B19 /FEA=EST /CNT=30 /TID=Mm.101058.1 /TIER=Stack /STK=15 /UG=Mm.101058 /LL=101677 /UG_GENE=AI850523 /UG_TITLE=expressed sequence AI850523	1043.2	2713	0.00202108	2.60065	Grm5
1419918_at	gb:AW545765 /DB_XREF=gi:7188182 /DB_XREF=C0198A06-3 /CLONE=C0198A06 /FEA=EST /CNT=1 /TID=Mm.202023.1 /TIER=ConsEnd /STK=0 /UG=Mm.202023 /LL=107048 /UG_GENE=AW545765 /UG_TITLE=expressed sequence AW545765	568.6	1471.35	0.00102639	2.58767	Tmed7
1456656_at	gb:AI848705 /DB_XREF=gi:5492611 /DB_XREF=UI-M-AH1-agv-h-06-0-UI.s1 /CLONE=UI-M-AH1-agv-h-06-0-UI /FEA=EST /CNT=10 /TID=Mm.40698.1 /TIER=Stack /STK=8 /UG=Mm.40698 /LL=103301 /UG_GENE=AI848705 /UG_TITLE=expressed sequence AI848705	208.85	537	0.0051929	2.57122	Veli1
1456911_at	gb:BB831639 /DB_XREF=gi:17009882 /DB_XREF=BB831639 /CLONE=G930018E16 /FEA=EST /CNT=8 /TID=Mm.214961.1 /TIER=ConsEnd /STK=6 /UG=Mm.214961 /UG_TITLE=ESTs, Weakly similar to T00386 hypothetical protein KIAA0627 (H.sapiens)	66.7	170.8	0.00824821	2.56072	Clasp2
1442364_at	gb:BM239177 /DB_XREF=gi:17874447 /DB_XREF=K0530C01-3 /CLONE=K0530C01 /FEA=EST /CNT=6 /TID=Mm.214918.1 /TIER=ConsEnd /STK=3 /UG=Mm.214918 /UG_TITLE=ESTs	74.9	191.35	0.00781728	2.55474	Mapk14
1457137_at	gb:BB321110 /DB_XREF=gi:9029424 /DB_XREF=BB321110 /CLONE=B230397B03 /FEA=EST /CNT=6 /TID=Mm.54611.1 /TIER=ConsEnd /STK=5 /UG=Mm.54611 /UG_TITLE=ESTs	95.3	243.05	0.00170984	2.55037	BB321110
1456112_at	gb:AW554765 /DB_XREF=gi:7200188 /DB_XREF=L0245B10-3 /CLONE=L0245B10 /FEA=EST /CNT=76 /TID=Mm.28546.3 /TIER=Stack /STK=15 /UG=Mm.28546 /UG_TITLE=Mus musculus, Similar to hypothetical protein FLJ20505, clone MGC:7150 IMAGE:3256634, mRNA, complete cds	530.05	1350.65	0.000561705	2.54816	Tpr
1437285_at	gb:BG070096 /DB_XREF=gi:12552588 /DB_XREF=H3082G01-3 /CLONE=H3082G01 /FEA=EST /CNT=136 /TID=Mm.42110.2 /TIER=Stack /STK=20 /UG=Mm.42110 /LL=68646 /UG_GENE=1110020G09Rik /UG_TITLE=RIKEN cDNA 1110020G09 gene	62.35	158.25	0.00311965	2.53809	Nadk2
1456360_at	gb:BI466259 /DB_XREF=gi:15279137 /DB_XREF=ie23a05.x1 /FEA=EST /CNT=12 /TID=Mm.30127.5 /TIER=Stack /STK=11 /UG=Mm.30127 /LL=54339 /UG_GENE=Tes3-ps /UG_TITLE=testis derived transcript 3, pseudogene	200.7	507.4	0.00350761	2.52815	Tes3-ps
1437685_x_at	gb:BB235530 /DB_XREF=gi:8915238 /DB_XREF=BB235530 /CLONE=A630054J10 /FEA=EST /CNT=16 /TID=Mm.41573.8 /TIER=Stack /STK=15 /UG=Mm.41573 /LL=14264 /UG_GENE=Fmod /UG_TITLE=fibromodulin	176.2	444.3	0.00743702	2.52157	Fmod
1433598_at	gb:BG093966 /DB_XREF=gi:12576529 /DB_XREF=ut79h01.x1 /CLONE=IMAGE:3334129 /FEA=EST /CNT=196 /TID=Mm.27476.1 /TIER=Stack /STK=14 /UG=Mm.27476 /UG_TITLE=ESTs, Highly similar to hypothetical protein FLJ10154 (Homo sapiens) (H.sapiens)	130.45	328.55	0.000975938	2.51859	ut79h01.x1
1441396_at	gb:AV328619 /DB_XREF=gi:16395920 /DB_XREF=AV328619 /CLONE=6330442P21 /FEA=EST /CNT=4 /TID=Mm.118323.1 /TIER=ConsEnd /STK=4 /UG=Mm.118323 /UG_TITLE=ESTs	338.1	850.2	0.000283219	2.51464	B3galt1
1442312_at	gb:BM229258 /DB_XREF=gi:17792126 /DB_XREF=K0275G12-3 /CLONE=K0275G12 /FEA=EST /CNT=5 /TID=Mm.214658.1 /TIER=ConsEnd /STK=3 /UG=Mm.214658 /UG_TITLE=ESTs	106.15	266.75	0.00395227	2.51295	K0275G12-3
1427328_a_at	gb:BM221361 /DB_XREF=gi:17781705 /DB_XREF=K0103D03-3 /CLONE=K0103D03 /FEA=mRNA /CNT=21 /TID=Mm.26780.2 /TIER=Stack /STK=9 /UG=Mm.26780 /LL=76499 /UG_GENE=Clasp2-pending /UG_TITLE=CLIP associating protein 2	136.05	341.05	0.00784974	2.5068	Clasp2
1450120_at	gb:NM_018733.1 /DB_XREF=gi:9055327 /GEN=Scn1a /FEA=FLmRNA /CNT=29 /TID=Mm.142733.1 /TIER=FL /STK=2 /UG=Mm.142733 /LL=20265 /DEF=Mus musculus sodium channel, voltage-gated, type I, alpha polypeptide (Scn1a), mRNA. /PROD=sodium channel, voltage-gated, type I, alphapolypeptide /FL=gb:NM_018733.1 gb:L42339.1	217.4	544.25	0.00923629	2.50345	Scn1a
1456011_x_at	gb:BB210491 /DB_XREF=gi:8875444 /DB_XREF=BB210491 /CLONE=A430097M04 /FEA=EST /CNT=20 /TID=Mm.205266.3 /TIER=Stack /STK=20 /UG=Mm.205266 /LL=113868 /UG_GENE=Acaa /UG_TITLE=acetyl-Coenzyme A acyltransferase (peroxisomal 3-oxoacyl-Coenzyme A thiolase)	88.8	222.05	0.00343536	2.50056	Acaa1a
1459750_s_at	gb:AU015577 /DB_XREF=gi:3370368 /DB_XREF=AU015577 /CLONE=J0713G04 /FEA=EST /CNT=2 /TID=Mm.195308.1 /TIER=ConsEnd /STK=2 /UG=Mm.195308 /LL=52389 /UG_GENE=D7Ertd680e /UG_TITLE=DNA segment, Chr 7, ERATO Doi 680, expressed	669.45	1666.85	0.00485754	2.48988	Gpr123
1448885_at	gb:BB645629 /DB_XREF=gi:15402342 /DB_XREF=BB645629 /CLONE=B430305J03 /FEA=FLmRNA /CNT=101 /TID=Mm.26939.1 /TIER=Stack /STK=25 /UG=Mm.26939 /LL=74012 /UG_GENE=Rap2b /UG_TITLE=RAP2B, member of RAS oncogene family /FL=gb:NM_028712.1	639.2	1576.9	0.00468927	2.46699	Rap2b
1436875_at	gb:BB130476 /DB_XREF=gi:15408352 /DB_XREF=BB130476 /CLONE=9630045G20 /FEA=EST /CNT=50 /TID=Mm.121735.1 /TIER=Stack /STK=40 /UG=Mm.121735 /UG_TITLE=ESTs, Moderately similar to dynamin 2 (Mus musculus) (M.musculus)	469.55	1154.25	0.000611488	2.4582	Dnm3
1454454_at	gb:AK014085.1 /DB_XREF=gi:12851735 /FEA=mRNA /CNT=1 /TID=Mm.3823.3 /TIER=ConsEnd /STK=0 /UG=Mm.3823 /LL=15569 /UG_GENE=Elavl2 /UG_TITLE=ELAV (embryonic lethal, abnormal vision, Drosophila)-like 2 (Hu antigen B) /DEF=Mus musculus 13 days embryo head cDNA, RIKEN full-length enriched library, clone:3110027D11:ELAV (embryonic lethal, abnormal vision, Drosophila)-like 2 (Hu antigen B), full insert seq…	228.3	560.5	0.00266507	2.4551	Elavl2
1459984_at	gb:AI552688 /DB_XREF=gi:4485051 /DB_XREF=mm03c11.y1 /CLONE=IMAGE:520436 /FEA=EST /CNT=5 /TID=Mm.41152.3 /TIER=ConsEnd /STK=0 /UG=Mm.41152 /UG_TITLE=ESTs, Weakly similar to otoraplin (Mus musculus) (M.musculus)	135.35	328.35	0.00601364	2.42593	Mia3
1435602_at	gb:BE200310 /DB_XREF=gi:8712407 /DB_XREF=ug74e02.x1 /CLONE=IMAGE:1548122 /FEA=EST /CNT=17 /TID=Mm.20294.2 /TIER=Stack /STK=15 /UG=Mm.20294 /LL=20768 /UG_GENE=Sps2 /UG_TITLE=selenophosphate synthetase 2	936.85	2271.8	2.45489e-05	2.42493	Sephs2
1452258_at	gb:BB053757 /DB_XREF=gi:15404112 /DB_XREF=BB053757 /CLONE=6720465M13 /FEA=mRNA /CNT=192 /TID=Mm.18898.1 /TIER=Stack /STK=8 /UG=Mm.18898 /UG_TITLE=Mus musculus, clone IMAGE:3709746, mRNA, partial cds	365.05	882.7	0.000321486	2.41802	Phf20
1438714_at	gb:BB622498 /DB_XREF=gi:16461523 /DB_XREF=BB622498 /CLONE=6430408J18 /FEA=EST /CNT=21 /TID=Mm.12236.4 /TIER=Stack /STK=9 /UG=Mm.12236 /LL=22680 /UG_GENE=Zfp207 /UG_TITLE=zinc finger protein 207	383.7	927.4	0.000580866	2.41699	Zfp207
1443143_at	gb:BB039519 /DB_XREF=gi:16258551 /DB_XREF=BB039519 /CLONE=6030443C03 /FEA=EST /CNT=3 /TID=Mm.207172.1 /TIER=ConsEnd /STK=3 /UG=Mm.207172 /UG_TITLE=ESTs	85.45	205.55	0.00771822	2.4055	Flrt1
1436533_at	gb:AV232359 /DB_XREF=gi:15405019 /DB_XREF=AV232359 /CLONE=4632414A09 /FEA=EST /CNT=58 /TID=Mm.40370.1 /TIER=Stack /STK=8 /UG=Mm.40370 /LL=69056 /UG_GENE=1810007I17Rik /UG_TITLE=RIKEN cDNA 1810007I17 gene	433.65	1042.85	0.00591896	2.40482	Trove2
1457142_at	gb:BB667731 /DB_XREF=gi:16399180 /DB_XREF=BB667731 /CLONE=C730036B16 /FEA=EST /CNT=10 /TID=Mm.131089.1 /TIER=ConsEnd /STK=5 /UG=Mm.131089 /UG_TITLE=ESTs	65.7	157.95	0.00780766	2.40411	Necab1
1424848_at	gb:AV356961 /DB_XREF=gi:6403963 /DB_XREF=AV356961 /CLONE=7330444E07 /FEA=FLmRNA /CNT=22 /TID=Mm.4123.2 /TIER=ConsEnd /STK=1 /UG=Mm.4123 /LL=16531 /UG_GENE=Kcnma1 /UG_TITLE=potassium large conductance calcium-activated channel, subfamily M, alpha member 1 /FL=gb:U09383.1	718.5	1723.75	0.00684729	2.3991	Kcnma1
1428376_at	gb:AK015136.1 /DB_XREF=gi:12853358 /FEA=mRNA /CNT=78 /TID=Mm.116284.1 /TIER=Stack /STK=19 /UG=Mm.116284 /LL=67723 /UG_GENE=4932415G12Rik /UG_TITLE=RIKEN cDNA 4932415G12 gene /DEF=Mus musculus adult male testis cDNA, RIKEN full-length enriched library, clone:4930414F20:unclassifiable, full insert sequence.	180.15	429.95	0.00215345	2.38662	4932415G12Rik
1441538_at	gb:BB267954 /DB_XREF=gi:16400462 /DB_XREF=BB267954 /CLONE=A830032M11 /FEA=EST /CNT=4 /TID=Mm.216918.1 /TIER=ConsEnd /STK=4 /UG=Mm.216918 /UG_TITLE=ESTs	53.2	126.3	0.00807005	2.37406	BB267954
1429882_at	gb:AK012880.1 /DB_XREF=gi:12849915 /FEA=mRNA /CNT=15 /TID=Mm.196128.1 /TIER=ConsEnd /STK=6 /UG=Mm.196128 /LL=77023 /UG_GENE=2810038F24Rik /UG_TITLE=RIKEN cDNA 2810038F24 gene /DEF=Mus musculus 10, 11 days embryo whole body cDNA, RIKEN full-length enriched library, clone:2810038F24:similar to CADHERIN-11 PRECURSOR (OSTEOBLAST-CADHERIN) (OB-CADHERIN) (OSF-4), full insert sequence.	79.05	186.1	0.00902818	2.35421	2610005L07Rik
1420012_at	gb:C77390 /DB_XREF=gi:2517720 /DB_XREF=C77390 /CLONE=J0030C12 /FEA=EST /CNT=1 /TID=Mm.195271.1 /TIER=ConsEnd /STK=0 /UG=Mm.195271 /LL=52219 /UG_GENE=D11Ertd39e /UG_TITLE=DNA segment, Chr 11, ERATO Doi 39, expressed	161.25	378.5	0.00377473	2.34729	Xbp1
1459659_at	gb:BB833349 /DB_XREF=gi:17011592 /DB_XREF=BB833349 /CLONE=G930026B02 /FEA=EST /CNT=2 /TID=Mm.152496.2 /TIER=ConsEnd /STK=2 /UG=Mm.152496 /UG_TITLE=ESTs	172.1	400.65	0.00130988	2.32801	BB833349
1436755_at	gb:AI317339 /DB_XREF=gi:4032606 /DB_XREF=uj13e01.x1 /CLONE=IMAGE:1907928 /FEA=EST /CNT=105 /TID=Mm.38459.1 /TIER=Stack /STK=61 /UG=Mm.38459 /UG_TITLE=ESTs, Weakly similar to INTER-ALPHA-TRYPSIN INHIBITOR HEAVY CHAIN H2 PRECURSOR (M.musculus)	114	264.7	0.0030888	2.32193	Itih5
1458439_a_at	gb:BM231657 /DB_XREF=gi:17866927 /DB_XREF=K0312G04-3 /CLONE=K0312G04 /FEA=EST /CNT=10 /TID=Mm.86668.1 /TIER=ConsEnd /STK=2 /UG=Mm.86668 /UG_TITLE=ESTs, Moderately similar to T00362 hypothetical protein KIAA0675 (H.sapiens)	540.25	1254.35	0.000121255	2.3218	Dzip3
1423065_at	gb:BB044612 /DB_XREF=gi:15403931 /DB_XREF=BB044612 /CLONE=6030489E13 /FEA=FLmRNA /CNT=313 /TID=Mm.5001.1 /TIER=Stack /STK=10 /UG=Mm.5001 /LL=13435 /UG_GENE=Dnmt3a /UG_TITLE=DNA methyltransferase 3A /FL=gb:BC007466.1 gb:AF068625.2 gb:NM_007872.1	101.25	234.35	0.00149811	2.31457	Dnmt3a
1421929_at	gb:BB706548 /DB_XREF=gi:16055383 /DB_XREF=BB706548 /CLONE=7420491D14 /FEA=FLmRNA /CNT=39 /TID=Mm.3249.1 /TIER=Stack /STK=18 /UG=Mm.3249 /LL=13838 /UG_GENE=Epha4 /UG_TITLE=Eph receptor A4 /FL=gb:NM_007936.1 gb:BC004782.1	413	955.9	0.00508693	2.31453	Epha4
1422535_at	gb:AF091432.1 /DB_XREF=gi:3769611 /FEA=FLmRNA /CNT=81 /TID=Mm.35867.1 /TIER=FL+Stack /STK=42 /UG=Mm.35867 /LL=12448 /UG_GENE=Ccne2 /DEF=Mus musculus cyclin E2 mRNA, complete cds. /PROD=cyclin E2 /FL=gb:AF091432.1 gb:NM_009830.1 gb:AF106691.1	98.85	227.4	0.00754963	2.30046	Ccne2
1452089_at	gb:AW106929 /DB_XREF=gi:6077729 /DB_XREF=um34d04.x1 /CLONE=IMAGE:2236423 /FEA=FLmRNA /CNT=79 /TID=Mm.28404.1 /TIER=Stack /STK=71 /UG=Mm.28404 /UG_TITLE=Mus musculus, clone MGC:31529 IMAGE:4501980, mRNA, complete cds /FL=gb:BC026479.1	891.75	2049.45	0.00133497	2.29823	Cacnb4
1424598_at	gb:BC021452.1 /DB_XREF=gi:18203916 /FEA=FLmRNA /CNT=56 /TID=Mm.157743.1 /TIER=FL+Stack /STK=23 /UG=Mm.157743 /LL=13209 /UG_GENE=Ddx6 /DEF=Mus musculus, DEAD (aspartate-glutamate-alanine-aspartate) box polypeptide 6, clone MGC:29113 IMAGE:5043599, mRNA, complete cds. /PROD=DEAD (aspartate-glutamate-alanine-aspartate) boxpolypeptide 6 /FL=gb:BC021452.1	406.15	931.45	0.000383015	2.29336	Ddx6
1439684_at	gb:BB428007 /DB_XREF=gi:16423877 /DB_XREF=BB428007 /CLONE=C630015G22 /FEA=EST /CNT=7 /TID=Mm.119326.1 /TIER=ConsEnd /STK=7 /UG=Mm.119326 /UG_TITLE=ESTs	75.55	172.5	0.00230739	2.28326	4930570G19Rik
1447223_at	gb:AW120584 /DB_XREF=gi:6095917 /DB_XREF=UI-M-BH1-ana-h-11-0-UI.s2 /CLONE=UI-M-BH1-ana-h-11-0-UI /FEA=EST /CNT=2 /TID=Mm.39221.1 /TIER=ConsEnd /STK=2 /UG=Mm.39221 /UG_TITLE=ESTs	456.85	1037.95	0.000406159	2.27197	UI-M-BH1-ana-h-11-0-UI.s2
1424877_a_at	gb:BC018236.1 /DB_XREF=gi:17390543 /FEA=FLmRNA /CNT=71 /TID=Mm.6988.2 /TIER=FL+Stack /STK=12 /UG=Mm.6988 /LL=17025 /UG_GENE=Alad /DEF=Mus musculus, Similar to aminolevulinate, delta-, dehydratase, clone MGC:18970 IMAGE:3992605, mRNA, complete cds. /PROD=Similar to aminolevulinate, delta-, dehydratase /FL=gb:BC018236.1	1265.45	2868.1	0.000934211	2.26647	Alad
1456088_at	gb:BF134200 /DB_XREF=gi:10973240 /DB_XREF=601778893F1 /CLONE=IMAGE:4007134 /FEA=EST /CNT=157 /TID=Mm.149115.6 /TIER=Stack /STK=16 /UG=Mm.149115 /LL=11798 /UG_GENE=Birc4 /UG_TITLE=baculoviral IAP repeat-containing 4	188.8	427.1	0.00240807	2.26218	Xiap
1420491_at	gb:NM_026114.1 /DB_XREF=gi:13385623 /GEN=Eif2a /FEA=FLmRNA /CNT=86 /TID=Mm.196220.1 /TIER=FL /STK=4 /UG=Mm.196220 /LL=13665 /DEF=Mus musculus eukaryotic translation initiation factor 2A (Eif2a), mRNA. /PROD=eukaryotic translation initiation factor 2A /FL=gb:BC016448.1 gb:BC005463.1 gb:NM_026114.1 gb:BC016497.1	104.45	236.1	0.00146872	2.26041	Eif2a
1419911_at	gb:AW548837 /DB_XREF=gi:7194261 /DB_XREF=L0042E03-3 /CLONE=L0042E03 /FEA=EST /CNT=1 /TID=Mm.203148.1 /TIER=ConsEnd /STK=0 /UG=Mm.203148 /LL=100991 /UG_GENE=AW548837 /UG_TITLE=expressed sequence AW548837	92.5	208.9	0.00491234	2.25838	Coro1c
1457058_at	gb:BM125019 /DB_XREF=gi:17108787 /DB_XREF=L0548H08-3 /CLONE=L0548H08 /FEA=EST /CNT=14 /TID=Mm.89563.1 /TIER=ConsEnd /STK=5 /UG=Mm.89563 /LL=26550 /UG_GENE=Adamts2 /UG_TITLE=a disintegrin-like and metalloprotease (reprolysin type) with thrombospondin type 1 motif, 2	58.05	130.25	0.00203203	2.24376	Adamts2
1449961_at	gb:NM_011286.1 /DB_XREF=gi:16945961 /GEN=Rph3a /FEA=FLmRNA /CNT=11 /TID=Mm.181166.1 /TIER=FL /STK=3 /UG=Mm.181166 /LL=19894 /DEF=Mus musculus rabphilin 3A (Rph3a), mRNA. /PROD=rabphilin 3A /FL=gb:D29965.1 gb:NM_011286.1	407.3	912.4	0.000203881	2.24012	Rph3a
1456393_at	gb:AI642124 /DB_XREF=gi:4720599 /DB_XREF=uc46b06.x1 /CLONE=IMAGE:1401011 /FEA=EST /CNT=29 /TID=Mm.1605.2 /TIER=Stack /STK=10 /UG=Mm.1605 /LL=18569 /UG_GENE=Pdcd4 /UG_TITLE=programmed cell death 4	2993.45	6674.5	0.0026284	2.2297	Pdcd4
1427542_at	gb:BC027318.1 /DB_XREF=gi:20071233 /FEA=mRNA /CNT=5 /TID=Mm.153750.1 /TIER=ConsEnd /STK=0 /UG=Mm.153750 /UG_TITLE=Mus musculus, clone IMAGE:3980989, mRNA /DEF=Mus musculus, clone IMAGE:3980989, mRNA.	506.05	1127.55	0.0045354	2.22814	Sobp
1435520_at	gb:BB418489 /DB_XREF=gi:16423415 /DB_XREF=BB418489 /CLONE=C530010I15 /FEA=EST /CNT=101 /TID=Mm.35930.1 /TIER=Stack /STK=15 /UG=Mm.35930 /LL=103787 /UG_GENE=AI563628 /UG_TITLE=expressed sequence AI563628	277.7	618.05	0.00160948	2.2256	Msi2
1451762_a_at	gb:AB023656.1 /DB_XREF=gi:4512329 /GEN=KIF1B /FEA=FLmRNA /CNT=18 /TID=Mm.42027.3 /TIER=FL /STK=1 /UG=Mm.42027 /LL=16561 /DEF=Mus musculus mRNA for KIF1B-beta, complete cds. /PROD=KIF1B-beta /FL=gb:AB023656.1	387.45	860.85	0.00104668	2.22184	Kif1b
1438980_x_at	gb:BB027848 /DB_XREF=gi:8205780 /DB_XREF=BB027848 /CLONE=5330439E18 /FEA=EST /CNT=9 /TID=Mm.23844.2 /TIER=Stack /STK=9 /UG=Mm.23844 /UG_TITLE=Mus musculus, clone IMAGE:5124369, mRNA, partial cds	100.45	222.5	0.00540754	2.21503	BB027848
1440500_at	gb:BG070411 /DB_XREF=gi:12552980 /DB_XREF=H3087A10-3 /CLONE=H3087A10 /FEA=EST /CNT=6 /TID=Mm.118644.1 /TIER=ConsEnd /STK=5 /UG=Mm.118644 /UG_TITLE=ESTs	264.4	584.6	0.00176935	2.21104	H3087A10-3
1416779_at	gb:BE197945 /DB_XREF=gi:8710114 /DB_XREF=ug76h12.x1 /CLONE=IMAGE:1548359 /FEA=FLmRNA /CNT=150 /TID=Mm.220962.1 /TIER=Stack /STK=10 /UG=Mm.220962 /LL=20324 /UG_GENE=Sdpr /UG_TITLE=serum deprivation response /FL=gb:NM_138741.1 gb:BC027005.1 gb:BC020008.1	123.5	271.55	0.00106651	2.19879	Sdpr
1438363_at	gb:BB332375 /DB_XREF=gi:9041138 /DB_XREF=BB332375 /CLONE=B730047G02 /FEA=EST /CNT=11 /TID=Mm.131907.1 /TIER=Stack /STK=11 /UG=Mm.131907 /UG_TITLE=ESTs, Weakly similar to KIAA1183 protein (H.sapiens)	136.3	299.3	0.00497464	2.19589	BB332375
1457744_at	gb:BG243238 /DB_XREF=gi:12753053 /DB_XREF=602355656F1 /CLONE=IMAGE:4484196 /FEA=EST /CNT=6 /TID=Mm.212498.1 /TIER=ConsEnd /STK=3 /UG=Mm.212498 /UG_TITLE=ESTs, Moderately similar to A57514 RNA helicase HEL117 - rat (R.norvegicus)	57.2	125.25	0.00550701	2.18969	Ddx46
1431804_a_at	gb:AK004607.1 /DB_XREF=gi:12835892 /FEA=mRNA /CNT=1 /TID=Mm.28513.2 /TIER=ConsEnd /STK=0 /UG=Mm.28513 /LL=20687 /UG_GENE=Sp3 /UG_TITLE=trans-acting transcription factor 3 /DEF=Mus musculus adult male lung cDNA, RIKEN full-length enriched library, clone:1200006A08:trans-acting transcription factor 3, full insert sequence.	522.7	1139.5	0.00445723	2.18003	Sp3
1449218_at	gb:NM_007751.1 /DB_XREF=gi:6680994 /GEN=Cox8b /FEA=FLmRNA /CNT=27 /TID=Mm.3841.1 /TIER=FL+Stack /STK=18 /UG=Mm.3841 /LL=12869 /DEF=Mus musculus cytochrome c oxidase, subunit VIIIb (Cox8b), mRNA. /PROD=cytochrome c oxidase, subunit VIIIb /FL=gb:U15541.1 gb:NM_007751.1	499.6	1086.55	0.00515586	2.17484	Cox8b
1418141_at	gb:BM115908 /DB_XREF=gi:17078926 /DB_XREF=L0827D09-3 /CLONE=L0827D09 /FEA=FLmRNA /CNT=90 /TID=Mm.12871.1 /TIER=Stack /STK=10 /UG=Mm.12871 /LL=13193 /UG_GENE=Dcx /UG_TITLE=doublecortin /FL=gb:AB011678.1 gb:AF045547.1 gb:NM_010025.1	186.2	402.6	0.00272327	2.16219	Dcx
1422834_at	gb:NM_019697.1 /DB_XREF=gi:9790092 /GEN=Kcnd2 /FEA=FLmRNA /CNT=51 /TID=Mm.132309.1 /TIER=FL+Stack /STK=10 /UG=Mm.132309 /LL=16508 /DEF=Mus musculus potassium voltage-gated channel, Shal-related family, member 2 (Kcnd2), mRNA. /PROD=potassium voltage-gated channel, Shal-relatedfamily, member 2 /FL=gb:AF107780.1 gb:NM_019697.1	584.95	1264.75	0.000307538	2.16215	Kcnd2
1417820_at	gb:NM_133673.1 /DB_XREF=gi:19526827 /GEN=Tor1b /FEA=FLmRNA /CNT=210 /TID=Mm.206786.1 /TIER=FL+Stack /STK=24 /UG=Mm.206786 /LL=30934 /DEF=Mus musculus torsin family 1, member B (Tor1b), mRNA. /PROD=torsin family 1, member B /FL=gb:NM_133673.1 gb:BC018456.1	321.3	692.9	0.00310103	2.15655	Tor1b
1423860_at	gb:AB006361.1 /DB_XREF=gi:2317285 /FEA=FLmRNA /CNT=130 /TID=Mm.1008.1 /TIER=FL+Stack /STK=89 /UG=Mm.1008 /LL=19215 /UG_GENE=Ptgds /DEF=Mus musculus mRNA for prostaglandin D synthetase, complete cds. /PROD=prostaglandin D synthetase /FL=gb:AB006361.1	13146.8	28338.4	0.00249802	2.15554	Ptgds
1444001_at	gb:AW488249 /DB_XREF=gi:7058519 /DB_XREF=UI-M-BH3-ary-d-05-0-UI.s1 /CLONE=UI-M-BH3-ary-d-05-0-UI /FEA=EST /CNT=7 /TID=Mm.39545.1 /TIER=ConsEnd /STK=2 /UG=Mm.39545 /UG_TITLE=ESTs	311.4	669.8	0.00116269	2.15093	Strbp
1438620_x_at	gb:BB497685 /DB_XREF=gi:9471882 /DB_XREF=BB497685 /CLONE=D630010A08 /FEA=EST /CNT=10 /TID=Mm.3171.2 /TIER=Stack /STK=10 /UG=Mm.3171 /LL=20377 /UG_GENE=Sfrp1 /UG_TITLE=secreted frizzled-related sequence protein 1	81.8	175.8	0.00410421	2.14914	Sfrp1
1436898_at	gb:BI738328 /DB_XREF=gi:15715341 /DB_XREF=603361584F1 /CLONE=IMAGE:5368748 /FEA=EST /CNT=50 /TID=Mm.43213.3 /TIER=Stack /STK=37 /UG=Mm.43213 /LL=71514 /UG_GENE=9030402K04Rik /UG_TITLE=RIKEN cDNA 9030402K04 gene	334.75	718.9	0.00519359	2.14757	603361584F1
1421534_at	gb:NM_008016.1 /DB_XREF=gi:6679796 /GEN=Fin15 /FEA=FLmRNA /CNT=5 /TID=Mm.3421.1 /TIER=FL /STK=2 /UG=Mm.3421 /LL=14210 /DEF=Mus musculus fibroblast growth factor inducible 15 (Fin15), mRNA. /PROD=fibroblast growth factor inducible 15 /FL=gb:NM_008016.1 gb:U42384.1	826.1	1770.55	0.00522675	2.14326	Mpp6
1436646_at	gb:BB389250 /DB_XREF=gi:9112101 /DB_XREF=BB389250 /CLONE=C230061H23 /FEA=EST /CNT=9 /TID=Mm.63205.2 /TIER=Stack /STK=8 /UG=Mm.63205 /UG_TITLE=ESTs	1480.3	3163.25	0.00930021	2.1369	BB389250
1439422_a_at	gb:AV048291 /DB_XREF=gi:5134063 /DB_XREF=AV048291 /CLONE=1810004D23 /FEA=EST /CNT=8 /TID=Mm.29140.3 /TIER=Stack /STK=8 /UG=Mm.29140 /LL=67389 /UG_GENE=1110035L05Rik /UG_TITLE=RIKEN cDNA 1110035L05 gene	859.9	1836.55	0.00116749	2.13577	Fam132a
1436746_at	gb:BI692255 /DB_XREF=gi:15654884 /DB_XREF=603342721F1 /CLONE=IMAGE:5370700 /FEA=EST /CNT=96 /TID=Mm.27341.1 /TIER=Stack /STK=69 /UG=Mm.27341 /UG_TITLE=ESTs, Moderately similar to protein kinase, lysine deficient 1 (Rattus norvegicus) (R.norvegicus)	533.65	1136.05	0.00669032	2.12883	Wnk1
1432646_a_at	gb:AK013851.1 /DB_XREF=gi:12851370 /FEA=mRNA /CNT=3 /TID=Mm.15985.3 /TIER=ConsEnd /STK=0 /UG=Mm.15985 /LL=14705 /UG_GENE=Gng3lg /UG_TITLE=G protein gamma 3 linked gene /DEF=Mus musculus adult male hippocampus cDNA, RIKEN full-length enriched library, clone:2900097C17:unclassifiable transcript, full insert sequence.	314	668.2	0.000538467	2.12803	Gng3lg
1426851_a_at	gb:X96585.1 /DB_XREF=gi:1226018 /GEN=nov /FEA=mRNA /CNT=60 /TID=Mm.5167.2 /TIER=Stack /STK=49 /UG=Mm.5167 /LL=18133 /UG_TITLE=nephroblastoma overexpressed gene /DEF=M.musculus mRNA for NOV protein.	2952.8	6277.85	0.00400379	2.12607	Nov
1429210_at	gb:BE290548 /DB_XREF=gi:9171667 /DB_XREF=601088291F1 /CLONE=IMAGE:3482902 /FEA=mRNA /CNT=30 /TID=Mm.154093.1 /TIER=ConsEnd /STK=0 /UG=Mm.154093 /LL=72794 /UG_GENE=2810458L13Rik /UG_TITLE=RIKEN cDNA 2810458L13 gene	62.3	132.25	0.00159042	2.12279	Col23a1
1418066_at	gb:NM_007688.1 /DB_XREF=gi:6671745 /GEN=Cfl2 /FEA=FLmRNA /CNT=159 /TID=Mm.3373.1 /TIER=FL+Stack /STK=30 /UG=Mm.3373 /LL=12632 /DEF=Mus musculus cofilin 2, muscle (Cfl2), mRNA. /PROD=cofilin 2, muscle /FL=gb:L29468.1 gb:BC007138.1 gb:NM_007688.1	718.55	1514.9	0.00326957	2.10827	Cfl2
1425533_a_at	gb:BC025118.1 /DB_XREF=gi:19264082 /FEA=FLmRNA /CNT=45 /TID=Mm.41481.2 /TIER=FL /STK=1 /UG=Mm.41481 /LL=29819 /UG_GENE=Stau2 /DEF=Mus musculus, Similar to staufen, RNA binding protein, homolog 2 (Drosophila), clone MGC:36821 IMAGE:3670067, mRNA, complete cds. /PROD=Similar to staufen, RNA binding protein, homolog2 (Drosophila) /FL=gb:BC025118.1	1341.95	2824.05	0.00010122	2.10444	Stau2
1457045_at	gb:BB632261 /DB_XREF=gi:16468873 /DB_XREF=BB632261 /CLONE=A230020F20 /FEA=EST /CNT=12 /TID=Mm.156869.1 /TIER=ConsEnd /STK=5 /UG=Mm.156869 /LL=99464 /UG_GENE=BB182356 /UG_TITLE=expressed sequence BB182356	115.9	243.6	0.00152787	2.10181	Galnt13
1418230_a_at	gb:BC005621.1 /DB_XREF=gi:13542843 /FEA=FLmRNA /CNT=178 /TID=Mm.29097.1 /TIER=FL+Stack /STK=27 /UG=Mm.29097 /LL=110829 /UG_GENE=Lims1l /DEF=Mus musculus, RIKEN cDNA 4921524A02 gene, clone MGC:11585 IMAGE:3711611, mRNA, complete cds. /PROD=RIKEN cDNA 4921524A02 gene /FL=gb:NM_026148.1 gb:BC005621.1	153.95	322.95	0.00288695	2.09776	Lims1l
1422748_at	gb:NM_015753.1 /DB_XREF=gi:7657694 /GEN=Zfhx1b /FEA=FLmRNA /CNT=37 /TID=Mm.37676.1 /TIER=FL+Stack /STK=15 /UG=Mm.37676 /LL=24136 /DEF=Mus musculus zinc finger homeobox 1b (Zfhx1b), mRNA. /PROD=zinc finger homeobox 1b /FL=gb:NM_015753.1 gb:AF033116.1	1514.15	3174.9	0.00409683	2.09682	Zfhx1b
1442019_at	gb:BB627097 /DB_XREF=gi:16464880 /DB_XREF=BB627097 /CLONE=9430058J20 /FEA=EST /CNT=8 /TID=Mm.152121.2 /TIER=ConsEnd /STK=3 /UG=Mm.152121 /UG_TITLE=ESTs	356.25	746.35	0.00590338	2.09502	Gas7
1438312_s_at	gb:BB324823 /DB_XREF=gi:9033137 /DB_XREF=BB324823 /CLONE=B430111O16 /FEA=EST /CNT=12 /TID=Mm.182396.3 /TIER=Stack /STK=11 /UG=Mm.182396 /LL=78891 /UG_GENE=Ntkl /UG_TITLE=N-terminal kinase-like	829.75	1737.25	0.00131856	2.0937	Ntkl
1422660_at	gb:AY052560.1 /DB_XREF=gi:15983756 /FEA=FLmRNA /CNT=289 /TID=Mm.2591.1 /TIER=FL+Stack /STK=20 /UG=Mm.2591 /LL=19652 /UG_GENE=Rbm3 /DEF=Mus musculus RNA-binding motif protein 3 mRNA, complete cds. /PROD=RNA-binding motif protein 3 /FL=gb:AB016424.1 gb:BC006580.1 gb:NM_016809.1 gb:AY052560.1	3561.75	7452.95	0.00282876	2.0925	Rbm3
1424474_a_at	gb:BC023103.1 /DB_XREF=gi:18606333 /FEA=FLmRNA /CNT=66 /TID=Mm.87620.1 /TIER=FL+Stack /STK=30 /UG=Mm.87620 /DEF=Mus musculus, Similar to Ca+Calmodulin-dependent protein kinase kinase beta (CaM-kinase kinase beta), clone MGC:28245 IMAGE:3993474, mRNA, complete cds. /PROD=Similar to Ca+Calmodulin-dependent proteinkinase kinase beta (CaM-kinase kinase beta) /FL=gb:BC023103.1	1343.1	2807.7	0.00131154	2.09046	Camkk2
1437107_at	gb:BB398063 /DB_XREF=gi:16412364 /DB_XREF=BB398063 /CLONE=C330006L04 /FEA=EST /CNT=110 /TID=Mm.193647.1 /TIER=Stack /STK=13 /UG=Mm.193647 /LL=52848 /UG_GENE=D9Bwg0185e /UG_TITLE=DNA segment, Chr 9, Brigham & Womens Genetics 0185 expressed	371.45	776.05	0.00235789	2.08924	Rab6b
1444058_at	gb:BM231657 /DB_XREF=gi:17866927 /DB_XREF=K0312G04-3 /CLONE=K0312G04 /FEA=EST /CNT=10 /TID=Mm.86668.1 /TIER=ConsEnd /STK=2 /UG=Mm.86668 /UG_TITLE=ESTs, Moderately similar to T00362 hypothetical protein KIAA0675 (H.sapiens)	282	584.55	0.00782696	2.07287	Dzip3
1423597_at	gb:BB303874 /DB_XREF=gi:15411244 /DB_XREF=BB303874 /CLONE=B230107D19 /FEA=FLmRNA /CNT=81 /TID=Mm.33083.1 /TIER=Stack /STK=9 /UG=Mm.33083 /LL=11980 /UG_GENE=Atp8a1 /UG_TITLE=ATPase, aminophospholipid transporter (APLT), class I, type 8A, member 1 /FL=gb:NM_009727.1 gb:U75321.1	1472.45	3048.4	0.00012248	2.07029	Atp3a2
1441178_at	gb:BB818617 /DB_XREF=gi:16991246 /DB_XREF=BB818617 /CLONE=G730045K17 /FEA=EST /CNT=5 /TID=Mm.96010.1 /TIER=ConsEnd /STK=4 /UG=Mm.96010 /LL=107063 /UG_GENE=BB115449 /UG_TITLE=expressed sequence BB115449	56.95	117.45	0.00271701	2.06234	Dtwd2
1437179_at	gb:BG070871 /DB_XREF=gi:12553528 /DB_XREF=H3093B06-3 /CLONE=H3093B06 /FEA=EST /CNT=33 /TID=Mm.12647.1 /TIER=Stack /STK=23 /UG=Mm.12647 /UG_TITLE=ESTs, Moderately similar to unnamed protein product (H.sapiens)	233.95	481.75	0.00451364	2.0592	Rif1
1456419_at	gb:BI108098 /DB_XREF=gi:14558991 /DB_XREF=602902496F1 /CLONE=IMAGE:5032198 /FEA=EST /CNT=41 /TID=Mm.86860.2 /TIER=Stack /STK=10 /UG=Mm.86860 /LL=70591 /UG_GENE=5730455P16Rik /UG_TITLE=RIKEN cDNA 5730455P16 gene	847.45	1739.05	0.00650108	2.0521	5730455P16Rik
1417135_at	gb:BG805074 /DB_XREF=gi:17952002 /DB_XREF=0612-12 /FEA=FLmRNA /CNT=188 /TID=Mm.8709.1 /TIER=Stack /STK=35 /UG=Mm.8709 /LL=20817 /UG_GENE=Srpk2 /UG_TITLE=serinearginine-rich protein specific kinase 2 /FL=gb:AB006036.1 gb:BC020178.1 gb:NM_009274.1	1940.6	3974.6	0.00267843	2.04813	Srpk2
1450368_a_at	gb:NM_024459.1 /DB_XREF=gi:13277369 /GEN=Ppp3r1 /FEA=FLmRNA /CNT=2 /TID=Mm.41840.1 /TIER=FL /STK=2 /UG=Mm.41840 /LL=19058 /DEF=Mus musculus protein phospatase 3, regulatory subunit B, alpha isoform (calcineurin B, type I) (Ppp3r1), mRNA. /PROD=protein phospatase 3, regulatory subunit B,alpha isoform (calcineurin B, type I) /FL=gb:NM_024459.1 gb:BC002267.1	199.6	408.75	0.00992042	2.04785	Cnb1
1425213_at	gb:BC025646.1 /DB_XREF=gi:19343910 /FEA=FLmRNA /CNT=16 /TID=Mm.44355.1 /TIER=FL /STK=4 /UG=Mm.44355 /LL=76886 /UG_GENE=6430514L14Rik /DEF=Mus musculus, similar to putative, clone MGC:38269 IMAGE:5324986, mRNA, complete cds. /PROD=similar to putative /FL=gb:BC025646.1	3084.35	6303.15	0.00121085	2.04359	Fam81a
1436115_at	gb:BB829749 /DB_XREF=gi:17007992 /DB_XREF=BB829749 /CLONE=G930008I03 /FEA=EST /CNT=12 /TID=Mm.81916.1 /TIER=Stack /STK=11 /UG=Mm.81916 /UG_TITLE=ESTs, Weakly similar to GTP-binding protein ROC2 (M.musculus)	194	395.8	0.00167976	2.04021	Gm266
1434752_at	gb:BQ174259 /DB_XREF=gi:20349750 /DB_XREF=UI-M-DJ2-bvx-f-07-0-UI.s1 /CLONE=UI-M-DJ2-bvx-f-07-0-UI /FEA=EST /CNT=80 /TID=Mm.12236.3 /TIER=Stack /STK=25 /UG=Mm.12236 /LL=22680 /UG_GENE=Zfp207 /UG_TITLE=zinc finger protein 207	56.1	114.45	0.00346647	2.04011	Zfp207
1449482_at	gb:NM_030082.1 /DB_XREF=gi:13386451 /GEN=1500011O09Rik /FEA=FLmRNA /CNT=23 /TID=Mm.28022.1 /TIER=FL+Stack /STK=9 /UG=Mm.28022 /LL=78303 /DEF=Mus musculus RIKEN cDNA 1500011O09 gene (1500011O09Rik), mRNA. /PROD=RIKEN cDNA 1500011O09 /FL=gb:NM_030082.1	717	1462.65	0.000789652	2.03996	Hist3h2ba
1456054_a_at	gb:BB314559 /DB_XREF=gi:9015264 /DB_XREF=BB314559 /CLONE=B230348A11 /FEA=EST /CNT=18 /TID=Mm.34701.2 /TIER=Stack /STK=18 /UG=Mm.34701 /LL=80912 /UG_GENE=Pum1 /UG_TITLE=pumilio 1 (Drosophila)	1739.5	3546.4	0.00510847	2.03875	Pum1
1419414_at	gb:AB030194.1 /DB_XREF=gi:7259256 /FEA=FLmRNA /CNT=14 /TID=Mm.218764.1 /TIER=FL+Stack /STK=10 /UG=Mm.218764 /LL=64337 /UG_GENE=Gng13 /DEF=Mus musculus mRNA for G gamma protein, complete cds, clone:2-35. /PROD=G gamma protein /FL=gb:AY029485.1 gb:AB030194.1 gb:NM_022422.2	2054.45	4182.2	0.00219505	2.03568	Gng13
1424342_at	gb:BC010204.1 /DB_XREF=gi:16307329 /FEA=FLmRNA /CNT=255 /TID=Mm.12831.1 /TIER=FL+Stack /STK=36 /UG=Mm.12831 /LL=70705 /UG_GENE=3830421F13Rik /DEF=Mus musculus, RIKEN cDNA 3830421F13 gene, clone MGC:7144 IMAGE:3158224, mRNA, complete cds. /PROD=RIKEN cDNA 3830421F13 gene /FL=gb:BC010204.1	975.45	1982.65	0.000153619	2.03255	Fyttd1
1437641_at	gb:BE981473 /DB_XREF=gi:10650615 /DB_XREF=UI-M-CG0p-bdc-e-12-0-UI.s1 /CLONE=UI-M-CG0p-bdc-e-12-0-UI /FEA=EST /CNT=28 /TID=Mm.21524.1 /TIER=Stack /STK=15 /UG=Mm.21524 /LL=99938 /UG_GENE=BB077382 /UG_TITLE=expressed sequence BB077382	75.9	154	0.000695879	2.02899	Rprd2
1419662_at	gb:BC021939.1 /DB_XREF=gi:18314516 /FEA=FLmRNA /CNT=85 /TID=Mm.4258.1 /TIER=FL /STK=7 /UG=Mm.4258 /LL=18295 /UG_GENE=Ogn /DEF=Mus musculus, osteoglycin, clone MGC:36151 IMAGE:5067073, mRNA, complete cds. /PROD=osteoglycin /FL=gb:BC021939.1 gb:D31951.1 gb:NM_008760.1	286.4	580.55	0.00524721	2.02706	Ogn
1438039_at	gb:BE630599 /DB_XREF=gi:9913287 /DB_XREF=uu38b09.x1 /CLONE=IMAGE:3374201 /FEA=EST /CNT=21 /TID=Mm.36670.1 /TIER=Stack /STK=12 /UG=Mm.36670 /LL=104890 /UG_GENE=AI844876 /UG_TITLE=expressed sequence AI844876	546.3	1103.65	0.00733231	2.02023	Hectd1
1436766_at	gb:BB185790 /DB_XREF=gi:16270436 /DB_XREF=BB185790 /CLONE=A330029A02 /FEA=EST /CNT=103 /TID=Mm.24304.2 /TIER=Stack /STK=57 /UG=Mm.24304 /LL=192196 /UG_GENE=LOC192196 /UG_TITLE=CGI-74-like SR-rich	415.4	838.75	0.00291992	2.01914	LOC100861853
1417067_s_at	gb:AK014605.1 /DB_XREF=gi:12852564 /FEA=FLmRNA /CNT=129 /TID=Mm.28337.1 /TIER=ConsEnd /STK=5 /UG=Mm.28337 /LL=67426 /UG_GENE=4632432J16Rik /UG_TITLE=RIKEN cDNA 4632432J16 gene /DEF=Mus musculus 0 day neonate skin cDNA, RIKEN full-length enriched library, clone:4632432J16:HYPOTHETICAL HEART PROTEIN (FRAGMENT), full insert sequence. /FL=gb:NM_023341.1	261.15	527.05	0.00778022	2.01819	Adck3
1457275_at	gb:AI594683 /DB_XREF=gi:4603731 /DB_XREF=vt55h01.x1 /CLONE=IMAGE:1167025 /FEA=EST /CNT=10 /TID=Mm.83561.1 /TIER=ConsEnd /STK=4 /UG=Mm.83561 /UG_TITLE=ESTs	627.15	1265.45	0.00762269	2.01778	Dmn
1431403_a_at	gb:AK019929.1 /DB_XREF=gi:12860336 /FEA=mRNA /CNT=3 /TID=Mm.160079.2 /TIER=ConsEnd /STK=0 /UG=Mm.160079 /LL=78283 /UG_GENE=5330432J06Rik /UG_TITLE=RIKEN cDNA 5330432J06 gene /DEF=Mus musculus adult male pituitary gland cDNA, RIKEN full-length enriched library, clone:5330432J06:hypothetical protein, full insert sequence.	800.35	1613.65	0.00329302	2.01618	Map7d2
1434817_s_at	gb:BM206427 /DB_XREF=gi:17761889 /DB_XREF=C0297D09-3 /CLONE=C0297D09 /FEA=EST /CNT=27 /TID=Mm.26257.1 /TIER=Stack /STK=25 /UG=Mm.26257 /LL=99803 /UG_GENE=AU021304 /UG_TITLE=expressed sequence AU021304	258.6	520.5	0.00561069	2.01276	Rprd2
1440827_x_at	gb:BB018032 /DB_XREF=gi:8189527 /DB_XREF=BB018032 /CLONE=4930572C18 /FEA=EST /CNT=5 /TID=Mm.61309.1 /TIER=ConsEnd /STK=5 /UG=Mm.61309 /UG_TITLE=ESTs	90.75	182.35	0.00732998	2.00937	Sox5
1448794_s_at	gb:BG067003 /DB_XREF=gi:12549572 /DB_XREF=H3049E03-3 /CLONE=H3049E03 /FEA=FLmRNA /CNT=94 /TID=Mm.2467.1 /TIER=Stack /STK=8 /UG=Mm.2467 /LL=22792 /UG_GENE=Zrf2 /UG_TITLE=zuotin related factor 2 /FL=gb:NM_009584.1 gb:D63784.1	363.75	729.5	0.00748941	2.0055	Dnajc2
1426777_a_at	gb:BF466143 /DB_XREF=gi:11535326 /DB_XREF=UI-M-CG0p-bqu-a-07-0-UI.s1 /CLONE=UI-M-CG0p-bqu-a-07-0-UI /FEA=mRNA /CNT=165 /TID=Mm.1574.1 /TIER=Stack /STK=30 /UG=Mm.1574 /LL=73178 /UG_GENE=Wasl /UG_TITLE=Wiskott-Aldrich syndrome-like (human)	726.2	1456.25	0.00296789	2.0053	Wasl
1454627_a_at	gb:AV110871 /DB_XREF=gi:5264951 /DB_XREF=AV110871 /CLONE=2600014O05 /FEA=EST /CNT=124 /TID=Mm.2235.3 /TIER=Stack /STK=118 /UG=Mm.2235 /LL=19944 /UG_GENE=Rpl29 /UG_TITLE=ribosomal protein L29	12779.4	25615.4	0.0028537	2.00444	Gm13921
1448300_at	gb:NM_025569.1 /DB_XREF=gi:13385009 /GEN=Mgst3 /FEA=FLmRNA /CNT=216 /TID=Mm.29823.1 /TIER=FL+Stack /STK=98 /UG=Mm.29823 /LL=66447 /DEF=Mus musculus microsomal glutathione S-transferase 3 (Mgst3), mRNA. /PROD=microsomal glutathione S-transferase 3 /FL=gb:NM_025569.1	2935.05	5866.8	0.00128904	1.99888	Mgst3
