# Supplementary material for: ACE Inhibition with Captopril Retards the Development of Signs of Neurodegeneration in an Animal Model of Alzheimer’s Disease
Source: Int J Mol Sci. 2013 Aug 16;14(8):16917–42. doi: 10.3390/ijms140816917 (PMC3759943; doi:10.3390/ijms140816917)
Supplement: Supplementary File 4 — Supplementary4 (XLS, 74 KB) [file ijms-14-16917-s004.xls]

## Sheet: Blatt1
Table S4. Significantly different hippocampal probe sets, which were concordantly increased in captopril-treated 18 month-old (Tg-18mo-ACEI) and 12 month-old Tg2576 (Tg-12mo) mice relative to untreated 18 month-old Tg2576 mice.
Affymetrix-ID	Descriptions	Mean Tg-18mo	Mean Tg-12mo	Raw p value	Fold change (ratio Tg-12mo/Tg-18mo)	Mean Tg-18mo	Mean Tg-18mo-ACEI	Raw p value	Fold change (ratio Tg-18mo-ACEI/Tg-18mo)	Gene name
1435521_at	gb:BQ174527 /DB_XREF=gi:20350018 /DB_XREF=UI-M-DJ2-bvy-k-08-0-UI.s1 /CLONE=UI-M-DJ2-bvy-k-08-0-UI /FEA=EST /CNT=101 /TID=Mm.35930.1 /TIER=Stack /STK=60 /UG=Mm.35930 /LL=103787 /UG_GENE=AI563628 /UG_TITLE=expressed sequence AI563628	156.7	987.1	0.00209311	6.2993	156.7	716.3	0.00285911	4.57116	Msi2
1442867_at	gb:BQ174216 /DB_XREF=gi:20349707 /DB_XREF=UI-M-DJ2-bvw-m-07-0-UI.s1 /CLONE=UI-M-DJ2-bvw-m-07-0-UI /FEA=EST /CNT=4 /TID=Mm.194351.1 /TIER=ConsEnd /STK=3 /UG=Mm.194351 /UG_TITLE=ESTs	99.2	546.95	0.00374058	5.51361	99.2	719.7	0.00167326	7.25504	Megf11
1436981_a_at	gb:BB706206 /DB_XREF=gi:16055041 /DB_XREF=BB706206 /CLONE=7420487L24 /FEA=EST /CNT=38 /TID=Mm.3360.4 /TIER=ConsEnd /STK=0 /UG=Mm.3360 /LL=22631 /UG_GENE=Ywhaz /UG_TITLE=tyrosine 3-monooxygenasetryptophan 5-monooxygenase activation protein, zeta polypeptide	230.45	1233.75	0.00279016	5.35366	230.45	644	0.00423819	2.79453	Ywhaz
1420402_at	gb:NM_009723.1 /DB_XREF=gi:6753139 /GEN=Atp2b2 /FEA=FLmRNA /CNT=26 /TID=Mm.20441.1 /TIER=FL /STK=5 /UG=Mm.20441 /LL=11941 /DEF=Mus musculus ATPase, Ca++ transporting, plasma membrane 2 (Atp2b2), mRNA. /PROD=ATPase, Ca++ transporting, plasma membrane 2 /FL=gb:AF053471.1 gb:NM_009723.1 gb:AB030738.1 gb:AB030737.1	517.8	2565.7	0.000585672	4.955	517.8	2312.9	0.000812663	4.46678	Atp2b2
1447763_at	gb:AV160090 /DB_XREF=gi:5403725 /DB_XREF=AV160090 /CLONE=3010040M24 /FEA=EST /CNT=2 /TID=Mm.45283.1 /TIER=ConsEnd /STK=2 /UG=Mm.45283 /UG_TITLE=ESTs	468.15	2184.4	0.0016003	4.66603	468.15	1113.6	0.00018099	2.37872	Snap25
1426114_at	gb:L36663.1 /DB_XREF=gi:840647 /FEA=FLmRNA /CNT=1 /TID=MmAffx.1.19 /TIER=FL /STK=1 /NOTE=sequence(s) not in UniGene /DEF=Mus musculus CArG box-binding factor mRNA, complete cds. /PROD=CArG box-binding factor /FL=gb:L36663.1	2549.95	11374.6	0.000119615	4.4607	2549.95	5837.95	0.000133588	2.28944	Hnrnpab
1447869_x_at	gb:AV047988 /DB_XREF=gi:4867653 /DB_XREF=AV047988 /CLONE=1700072E02 /FEA=EST /CNT=2 /TID=Mm.84884.1 /TIER=ConsEnd /STK=2 /UG=Mm.84884 /UG_TITLE=ESTs, Moderately similar to KIAA0878 protein (H.sapiens)	40.45	176.6	0.00122609	4.36588	40.45	346.35	9.49152e-05	8.56242	Rhobtb3
1435129_at	gb:AW495875 /DB_XREF=gi:7066156 /DB_XREF=up47g06.x1 /CLONE=IMAGE:2749306 /FEA=EST /CNT=20 /TID=Mm.6355.2 /TIER=Stack /STK=20 /UG=Mm.6355 /LL=19244 /UG_GENE=Ptp4a2 /UG_TITLE=protein tyrosine phosphatase 4a2	1992.65	8239.2	0.000532143	4.1348	1992.65	4167.7	0.00623697	2.09154	Ptp4a2
1415824_at	gb:BG060909 /DB_XREF=gi:12529872 /DB_XREF=L0900C01-5 /CLONE=L0900C01 /FEA=FLmRNA /CNT=525 /TID=Mm.193096.1 /TIER=Stack /STK=13 /UG=Mm.193096 /LL=20250 /UG_GENE=Scd2 /UG_TITLE=stearoyl-Coenzyme A desaturase 2 /FL=gb:NM_009128.1 gb:M26270.1	878.45	3628.9	0.000482344	4.13103	878.45	5153.7	0.000658432	5.86681	Scd2
1441728_at	gb:BI731739 /DB_XREF=gi:15708752 /DB_XREF=603353512F1 /CLONE=IMAGE:5361050 /FEA=EST /CNT=4 /TID=Mm.206118.1 /TIER=ConsEnd /STK=4 /UG=Mm.206118 /UG_TITLE=ESTs, Moderately similar to voltage gated Na channel Scn8a (M.musculus)	79.1	316.75	0.00116196	4.00442	79.1	526.45	0.000107364	6.6555	Scn1a
1457800_at	gb:AW122190 /DB_XREF=gi:6097643 /DB_XREF=UI-M-BH2.2-aov-b-01-0-UI.s1 /CLONE=UI-M-BH2.2-aov-b-01-0-UI /FEA=EST /CNT=5 /TID=Mm.150668.1 /TIER=ConsEnd /STK=3 /UG=Mm.150668 /UG_TITLE=ESTs	313.6	1255.45	0.00247688	4.00335	313.6	1700.15	0.00297223	5.4214	UI-M-BH2.2-aov-b-01-0-UI.s1
1450035_a_at	gb:BG064340 /DB_XREF=gi:12546903 /DB_XREF=H3018D11-3 /CLONE=H3018D11 /FEA=FLmRNA /CNT=123 /TID=Mm.87658.1 /TIER=Stack /STK=42 /UG=Mm.87658 /LL=56194 /UG_GENE=Fnbp3 /UG_TITLE=formin binding protein 3 /FL=gb:AF135439.1 gb:NM_018785.1	89.8	346.3	0.00933241	3.85635	89.8	741.6	0.00129971	8.25835	Fnbp3
1436850_at	gb:AV338277 /DB_XREF=gi:16396655 /DB_XREF=AV338277 /CLONE=6430408F09 /FEA=EST /CNT=85 /TID=Mm.122091.1 /TIER=Stack /STK=43 /UG=Mm.122091 /UG_TITLE=ESTs, Weakly similar to cellular repressor of E1A-stimulated genes (Mus musculus) (M.musculus)	100.6	383.9	0.00329988	3.8161	100.6	954.9	0.0064424	9.49205	Creg2
1453578_at	gb:BM939099 /DB_XREF=gi:19398251 /DB_XREF=UI-M-BZ1-bkc-c-08-0-UI.r1 /CLONE=UI-M-BZ1-bkc-c-08-0-UI /FEA=mRNA /CNT=20 /TID=Mm.81159.2 /TIER=ConsEnd /STK=1 /UG=Mm.81159 /LL=68921 /UG_GENE=1110065A22Rik /UG_TITLE=RIKEN cDNA 1110065A22 gene	162.5	587.25	0.00403113	3.61385	162.5	327.6	0.0025181	2.016	Pter
1439005_x_at	gb:BG968903 /DB_XREF=gi:14356540 /DB_XREF=602836072F1 /CLONE=IMAGE:4990697 /FEA=EST /CNT=48 /TID=Mm.3360.7 /TIER=ConsEnd /STK=0 /UG=Mm.3360 /LL=22631 /UG_GENE=Ywhaz /UG_TITLE=tyrosine 3-monooxygenasetryptophan 5-monooxygenase activation protein, zeta polypeptide	677.65	2416.2	0.00523772	3.56556	677.65	1472.4	0.00470055	2.1728	Ywhaz
1419034_at	gb:NM_007788.1 /DB_XREF=gi:7106274 /GEN=Csnk2a1-rs4 /FEA=FLmRNA /CNT=162 /TID=Mm.23692.1 /TIER=FL+Stack /STK=14 /UG=Mm.23692 /LL=12999 /DEF=Mus musculus casein kinase II, alpha 1 related sequence 4 (Csnk2a1-rs4), mRNA. /PROD=casein kinase II, alpha 1 related sequence 4 /FL=gb:NM_007788.1 gb:U51866.1 gb:BC026149.1	130.85	453.1	0.00253538	3.46274	130.85	338.8	0.00276391	2.58922	Csnk2a1
1437801_at	gb:BM115860 /DB_XREF=gi:17078878 /DB_XREF=L0826E05-3 /CLONE=L0826E05 /FEA=EST /CNT=15 /TID=Mm.196508.8 /TIER=Stack /STK=14 /UG=Mm.196508 /LL=21761 /UG_GENE=Tex189 /UG_TITLE=testis expressed gene 189	1886.05	6523.3	0.00611327	3.45871	1886.05	3770.65	0.0067731	1.99923	Morf4l1
1456120_at	gb:BB427489 /DB_XREF=gi:16423817 /DB_XREF=BB427489 /CLONE=C630011I23 /FEA=EST /CNT=23 /TID=Mm.183116.2 /TIER=Stack /STK=15 /UG=Mm.183116 /LL=66961 /UG_GENE=2310043N10Rik /UG_TITLE=RIKEN cDNA 2310043N10 gene	320.95	1108.95	0.00100833	3.45521	320.95	1498.8	0.000177497	4.66989	Secisbp2l
1430561_at	gb:BE952491 /DB_XREF=gi:10592997 /DB_XREF=UI-M-CE0-azc-d-08-0-UI.s1 /CLONE=UI-M-CE0-azc-d-08-0-UI /FEA=mRNA /CNT=28 /TID=Mm.30934.1 /TIER=ConsEnd /STK=1 /UG=Mm.30934 /LL=70604 /UG_GENE=5730496F10Rik /UG_TITLE=RIKEN cDNA 5730496F10 gene	735.9	2478.85	0.00159677	3.36846	735.9	3473.15	0.00276624	4.7196	Dnajb14
1430286_s_at	gb:AK013448.1 /DB_XREF=gi:12850809 /FEA=mRNA /CNT=4 /TID=Mm.45223.1 /TIER=ConsEnd /STK=3 /UG=Mm.45223 /LL=72819 /UG_GENE=2810487F15Rik /UG_TITLE=RIKEN cDNA 2810487F15 gene /DEF=Mus musculus 10, 11 days embryo whole body cDNA, RIKEN full-length enriched library, clone:2810487F15:homolog to SEROLOGICALLY DEFINED BREAST CANCER ANTIGEN NY-BR-81 (FRAGMENT), full insert sequence.	153.5	497.45	0.00178112	3.24072	153.5	608.25	0.00229937	3.96254	Gm14057
1440801_s_at	gb:BB391602 /DB_XREF=gi:9114556 /DB_XREF=BB391602 /CLONE=C230075D03 /FEA=EST /CNT=5 /TID=Mm.133170.1 /TIER=ConsEnd /STK=5 /UG=Mm.133170 /UG_TITLE=ESTs, Weakly similar to BETA-ADRENERGIC RECEPTOR KINASE 2 (R.norvegicus)	736.8	2351.75	0.00144998	3.19184	736.8	2470.1	0.00481857	3.35247	BB391602
1456863_at	gb:AI385584 /DB_XREF=gi:4199047 /DB_XREF=mb18d08.x1 /CLONE=IMAGE:329775 /FEA=EST /CNT=7 /TID=Mm.200233.1 /TIER=ConsEnd /STK=7 /UG=Mm.200233 /LL=98323 /UG_GENE=AI385584 /UG_TITLE=expressed sequence AI385584	97.7	305.15	0.00200537	3.12334	97.7	840.75	0.0056837	8.60542	Epha4
1418431_at	gb:BI328541 /DB_XREF=gi:15013198 /DB_XREF=602985332F1 /CLONE=IMAGE:5138167 /FEA=FLmRNA /CNT=397 /TID=Mm.3380.1 /TIER=Stack /STK=11 /UG=Mm.3380 /LL=16573 /UG_GENE=Kif5b /UG_TITLE=kinesin family member 5B /FL=gb:NM_008448.1 gb:U86090.1	441.05	1309.55	0.00396548	2.96916	441.05	1974.55	0.000201721	4.47693	Kif5b
1452722_a_at	gb:BB702110 /DB_XREF=gi:16050934 /DB_XREF=BB702110 /CLONE=7420437M16 /FEA=mRNA /CNT=238 /TID=Mm.46579.1 /TIER=Stack /STK=62 /UG=Mm.46579 /LL=75717 /UG_GENE=4921514I20Rik /UG_TITLE=RIKEN cDNA 4921514I20 gene	147.5	430.65	0.00588785	2.91966	147.5	705.5	0.0014954	4.78305	Cul5
1421754_at	gb:NM_133243.1 /DB_XREF=gi:18875413 /GEN=AY036118 /FEA=FLmRNA /CNT=2 /TID=MmAffx.1.3 /TIER=FL /STK=2 /NOTE=sequence(s) not in UniGene /DEF=Mus musculus cDNA sequence AY036118 (AY036118), mRNA. /PROD=cDNA sequence AY036118 /FL=gb:AY036118.1 gb:NM_133243.1	1462.7	4255.5	0.000878327	2.90935	1462.7	3741.8	0.00227888	2.55815	AY036118
1418018_at	gb:NM_007754.1 /DB_XREF=gi:6681000 /GEN=Cpd /FEA=FLmRNA /CNT=113 /TID=Mm.20910.1 /TIER=FL+Stack /STK=31 /UG=Mm.20910 /LL=12874 /DEF=Mus musculus carboxypeptidase D (Cpd), mRNA. /PROD=carboxypeptidase D /FL=gb:NM_007754.1 gb:D85391.1	420.25	1216.1	0.00582194	2.89375	420.25	2339.2	0.000547584	5.56621	Cpd
1439300_at	gb:BG065782 /DB_XREF=gi:12548345 /DB_XREF=H3035C01-3 /CLONE=H3035C01 /FEA=EST /CNT=8 /TID=Mm.132500.1 /TIER=Stack /STK=8 /UG=Mm.132500 /UG_TITLE=ESTs	333.35	960.95	0.00147038	2.88271	333.35	1670.1	0.00113903	5.01005	Brx
1439940_at	gb:AV328280 /DB_XREF=gi:15406324 /DB_XREF=AV328280 /CLONE=6330440N14 /FEA=EST /CNT=7 /TID=Mm.44658.1 /TIER=ConsEnd /STK=6 /UG=Mm.44658 /UG_TITLE=ESTs	2005.15	5778.6	0.00490629	2.88188	2005.15	6287.55	0.00171757	3.1357	Slc1a2
1439605_at	gb:BB464198 /DB_XREF=gi:16426978 /DB_XREF=BB464198 /CLONE=D130086J20 /FEA=EST /CNT=8 /TID=Mm.101451.1 /TIER=ConsEnd /STK=7 /UG=Mm.101451 /UG_TITLE=ESTs	87.95	253.35	0.00279552	2.88061	87.95	401.1	0.000972509	4.56055	BB464198
1418469_at	gb:AV272221 /DB_XREF=gi:16390145 /DB_XREF=AV272221 /CLONE=4931421O04 /FEA=FLmRNA /CNT=78 /TID=Mm.20895.1 /TIER=Stack /STK=8 /UG=Mm.20895 /LL=18184 /UG_GENE=Nrip1 /UG_TITLE=nuclear receptor interacting protein 1 /FL=gb:NM_008735.1 gb:AF053062.1	287.15	824.3	0.00538833	2.87063	287.15	1402.5	0.000241653	4.88421	Nrip1
1442027_at	gb:BB223743 /DB_XREF=gi:16353817 /DB_XREF=BB223743 /CLONE=A530083I02 /FEA=EST /CNT=10 /TID=Mm.77731.1 /TIER=ConsEnd /STK=3 /UG=Mm.77731 /UG_TITLE=ESTs, Weakly similar to FAN MOUSE PROTEIN FAN (M.musculus)	166.05	466.6	0.00316669	2.81	166.05	611.3	0.0022551	3.68142	Nbeal1
1422553_at	gb:NM_008960.1 /DB_XREF=gi:6679522 /GEN=Pten /FEA=FLmRNA /CNT=146 /TID=Mm.1591.1 /TIER=FL+Stack /STK=37 /UG=Mm.1591 /LL=19211 /DEF=Mus musculus phosphatase and tensin homolog (Pten), mRNA. /PROD=phosphatase and tensin homolog /FL=gb:BC021445.1 gb:NM_008960.1 gb:U92437.1	1013.2	2828.25	0.000405744	2.7914	1013.2	3845.15	0.000122921	3.79506	Pten
1425597_a_at	gb:AW060288 /DB_XREF=gi:6008004 /DB_XREF=UI-M-BH1-amv-b-05-0-UI.s1 /CLONE=UI-M-BH1-amv-b-05-0-UI /FEA=FLmRNA /CNT=22 /TID=Mm.2655.3 /TIER=Stack /STK=10 /UG=Mm.2655 /LL=19317 /UG_GENE=qk /UG_TITLE=quaking /FL=gb:U44940.1	281.05	782.05	0.00713168	2.7826	281.05	1283.7	0.0036066	4.56751	Qk
1456398_at	gb:BB648848 /DB_XREF=gi:16483103 /DB_XREF=BB648848 /CLONE=C130040L09 /FEA=EST /CNT=19 /TID=Mm.18728.2 /TIER=Stack /STK=10 /UG=Mm.18728 /LL=103674 /UG_GENE=AI316828 /UG_TITLE=expressed sequence AI316828	363.55	1004.35	0.0028458	2.76262	363.55	770.75	0.00835587	2.12007	Tug1
1438403_s_at	gb:BF537798 /DB_XREF=gi:11625166 /DB_XREF=602053404F1 /CLONE=IMAGE:4192561 /FEA=EST /CNT=31 /TID=Mm.218611.2 /TIER=Stack /STK=10 /UG=Mm.218611 /LL=54409 /UG_GENE=Ramp2 /UG_TITLE=receptor (calcitonin) activity modifying protein 2	904.3	2445.35	0.00631901	2.70414	904.3	2919.65	0.00167419	3.22863	Malat1
1437120_at	gb:BB320376 /DB_XREF=gi:16403306 /DB_XREF=BB320376 /CLONE=B230385I08 /FEA=EST /CNT=36 /TID=Mm.29971.2 /TIER=Stack /STK=25 /UG=Mm.29971 /LL=67804 /UG_GENE=Snx2 /UG_TITLE=sorting nexin 2	283.55	760.05	0.0032027	2.68048	283.55	672.7	0.00763816	2.37242	Snx2
1424077_at	gb:AK016023.1 /DB_XREF=gi:12854600 /FEA=FLmRNA /CNT=145 /TID=Mm.7775.1 /TIER=Stack /STK=38 /UG=Mm.7775 /LL=66569 /UG_GENE=2610020H15Rik /UG_TITLE=RIKEN cDNA 2610020H15 gene /DEF=Mus musculus adult male testis cDNA, RIKEN full-length enriched library, clone:4930542N03:homolog to CDNA: FLJ22603 FIS, CLONE HSI04564 (UNKNOWN) (PROTEIN FOR MGC:4171), full insert sequence. /FL=gb:BC016541.1	748.35	1985.35	0.000539006	2.65297	748.35	1774.3	0.000309988	2.37095	Gdpd1
1428045_a_at	gb:BC027739.1 /DB_XREF=gi:20381200 /FEA=mRNA /CNT=2 /TID=Mm.46503.4 /TIER=ConsEnd /STK=0 /UG=Mm.46503 /LL=69257 /UG_GENE=2610036A20Rik /UG_TITLE=RIKEN cDNA 2610036A20 gene /DEF=Mus musculus, Similar to RIKEN cDNA 2610036A20 gene, clone IMAGE:5009479, mRNA.	89.15	236	0.00614104	2.64722	89.15	390.05	0.00178722	4.37521	Elf2
1419038_a_at	gb:BB283759 /DB_XREF=gi:8984208 /DB_XREF=BB283759 /CLONE=A930103E12 /FEA=FLmRNA /CNT=162 /TID=Mm.23692.1 /TIER=Stack /STK=8 /UG=Mm.23692 /LL=12999 /UG_GENE=Csnk2a1-rs4 /UG_TITLE=casein kinase II, alpha 1 related sequence 4 /FL=gb:NM_007788.1 gb:U51866.1 gb:BC026149.1	870.4	2290.3	0.00174399	2.63132	870.4	3762.2	0.000635365	4.32238	Csnk2a1
1451569_at	gb:AU066920 /DB_XREF=gi:4967657 /DB_XREF=AU066920 /CLONE=MNCb-2722 /FEA=FLmRNA /CNT=73 /TID=Mm.3535.1 /TIER=Stack /STK=30 /UG=Mm.3535 /LL=22026 /UG_GENE=Nr2c2 /UG_TITLE=nuclear receptor subfamily 2, group C, member 2 /FL=gb:U11688.1	329.95	867.7	0.00132902	2.62979	329.95	1404.2	0.000186383	4.2558	Nr2c2
1456119_at	gb:AV334671 /DB_XREF=gi:16396307 /DB_XREF=AV334671 /CLONE=6330563B19 /FEA=EST /CNT=30 /TID=Mm.101058.1 /TIER=Stack /STK=15 /UG=Mm.101058 /LL=101677 /UG_GENE=AI850523 /UG_TITLE=expressed sequence AI850523	1043.2	2713	0.00202108	2.60065	1043.2	2978.85	0.000656824	2.85549	Grm5
1456656_at	gb:AI848705 /DB_XREF=gi:5492611 /DB_XREF=UI-M-AH1-agv-h-06-0-UI.s1 /CLONE=UI-M-AH1-agv-h-06-0-UI /FEA=EST /CNT=10 /TID=Mm.40698.1 /TIER=Stack /STK=8 /UG=Mm.40698 /LL=103301 /UG_GENE=AI848705 /UG_TITLE=expressed sequence AI848705	208.85	537	0.0051929	2.57122	208.85	827.5	0.00142471	3.96217	Veli1
1456911_at	gb:BB831639 /DB_XREF=gi:17009882 /DB_XREF=BB831639 /CLONE=G930018E16 /FEA=EST /CNT=8 /TID=Mm.214961.1 /TIER=ConsEnd /STK=6 /UG=Mm.214961 /UG_TITLE=ESTs, Weakly similar to T00386 hypothetical protein KIAA0627 (H.sapiens)	66.7	170.8	0.00824821	2.56072	66.7	245.95	0.00635989	3.68741	Clasp2
1456112_at	gb:AW554765 /DB_XREF=gi:7200188 /DB_XREF=L0245B10-3 /CLONE=L0245B10 /FEA=EST /CNT=76 /TID=Mm.28546.3 /TIER=Stack /STK=15 /UG=Mm.28546 /UG_TITLE=Mus musculus, Similar to hypothetical protein FLJ20505, clone MGC:7150 IMAGE:3256634, mRNA, complete cds	530.05	1350.65	0.000561705	2.54816	530.05	2431.45	0.00248305	4.58721	Tpr
1441396_at	gb:AV328619 /DB_XREF=gi:16395920 /DB_XREF=AV328619 /CLONE=6330442P21 /FEA=EST /CNT=4 /TID=Mm.118323.1 /TIER=ConsEnd /STK=4 /UG=Mm.118323 /UG_TITLE=ESTs	338.1	850.2	0.000283219	2.51464	338.1	1176.3	0.00540961	3.47915	B3galt1
1442312_at	gb:BM229258 /DB_XREF=gi:17792126 /DB_XREF=K0275G12-3 /CLONE=K0275G12 /FEA=EST /CNT=5 /TID=Mm.214658.1 /TIER=ConsEnd /STK=3 /UG=Mm.214658 /UG_TITLE=ESTs	106.15	266.75	0.00395227	2.51295	106.15	356.5	0.00342504	3.35846	K0275G12-3
1450120_at	gb:NM_018733.1 /DB_XREF=gi:9055327 /GEN=Scn1a /FEA=FLmRNA /CNT=29 /TID=Mm.142733.1 /TIER=FL /STK=2 /UG=Mm.142733 /LL=20265 /DEF=Mus musculus sodium channel, voltage-gated, type I, alpha polypeptide (Scn1a), mRNA. /PROD=sodium channel, voltage-gated, type I, alphapolypeptide /FL=gb:NM_018733.1 gb:L42339.1	217.4	544.25	0.00923629	2.50345	217.4	1309.6	0.00164412	6.02392	Scn1a
1448885_at	gb:BB645629 /DB_XREF=gi:15402342 /DB_XREF=BB645629 /CLONE=B430305J03 /FEA=FLmRNA /CNT=101 /TID=Mm.26939.1 /TIER=Stack /STK=25 /UG=Mm.26939 /LL=74012 /UG_GENE=Rap2b /UG_TITLE=RAP2B, member of RAS oncogene family /FL=gb:NM_028712.1	639.2	1576.9	0.00468927	2.46699	639.2	1823.4	0.00191548	2.85263	Rap2b
1436875_at	gb:BB130476 /DB_XREF=gi:15408352 /DB_XREF=BB130476 /CLONE=9630045G20 /FEA=EST /CNT=50 /TID=Mm.121735.1 /TIER=Stack /STK=40 /UG=Mm.121735 /UG_TITLE=ESTs, Moderately similar to dynamin 2 (Mus musculus) (M.musculus)	469.55	1154.25	0.000611488	2.4582	469.55	2156.55	0.000111038	4.5928	Dnm3
1459984_at	gb:AI552688 /DB_XREF=gi:4485051 /DB_XREF=mm03c11.y1 /CLONE=IMAGE:520436 /FEA=EST /CNT=5 /TID=Mm.41152.3 /TIER=ConsEnd /STK=0 /UG=Mm.41152 /UG_TITLE=ESTs, Weakly similar to otoraplin (Mus musculus) (M.musculus)	135.35	328.35	0.00601364	2.42593	135.35	753.55	0.00319757	5.56742	Mia3
1438714_at	gb:BB622498 /DB_XREF=gi:16461523 /DB_XREF=BB622498 /CLONE=6430408J18 /FEA=EST /CNT=21 /TID=Mm.12236.4 /TIER=Stack /STK=9 /UG=Mm.12236 /LL=22680 /UG_GENE=Zfp207 /UG_TITLE=zinc finger protein 207	383.7	927.4	0.000580866	2.41699	383.7	1069.75	0.00203104	2.78799	Zfp207
1443143_at	gb:BB039519 /DB_XREF=gi:16258551 /DB_XREF=BB039519 /CLONE=6030443C03 /FEA=EST /CNT=3 /TID=Mm.207172.1 /TIER=ConsEnd /STK=3 /UG=Mm.207172 /UG_TITLE=ESTs	85.45	205.55	0.00771822	2.4055	85.45	267.1	0.00199272	3.1258	Flrt1
1436533_at	gb:AV232359 /DB_XREF=gi:15405019 /DB_XREF=AV232359 /CLONE=4632414A09 /FEA=EST /CNT=58 /TID=Mm.40370.1 /TIER=Stack /STK=8 /UG=Mm.40370 /LL=69056 /UG_GENE=1810007I17Rik /UG_TITLE=RIKEN cDNA 1810007I17 gene	433.65	1042.85	0.00591896	2.40482	433.65	1010.4	0.00640591	2.32999	Trove2
1457142_at	gb:BB667731 /DB_XREF=gi:16399180 /DB_XREF=BB667731 /CLONE=C730036B16 /FEA=EST /CNT=10 /TID=Mm.131089.1 /TIER=ConsEnd /STK=5 /UG=Mm.131089 /UG_TITLE=ESTs	65.7	157.95	0.00780766	2.40411	65.7	221.5	0.000251171	3.37139	Necab1
1428376_at	gb:AK015136.1 /DB_XREF=gi:12853358 /FEA=mRNA /CNT=78 /TID=Mm.116284.1 /TIER=Stack /STK=19 /UG=Mm.116284 /LL=67723 /UG_GENE=4932415G12Rik /UG_TITLE=RIKEN cDNA 4932415G12 gene /DEF=Mus musculus adult male testis cDNA, RIKEN full-length enriched library, clone:4930414F20:unclassifiable, full insert sequence.	180.15	429.95	0.00215345	2.38662	180.15	689.4	0.00896508	3.82681	4932415G12Rik
1458439_a_at	gb:BM231657 /DB_XREF=gi:17866927 /DB_XREF=K0312G04-3 /CLONE=K0312G04 /FEA=EST /CNT=10 /TID=Mm.86668.1 /TIER=ConsEnd /STK=2 /UG=Mm.86668 /UG_TITLE=ESTs, Moderately similar to T00362 hypothetical protein KIAA0675 (H.sapiens)	540.25	1254.35	0.000121255	2.3218	540.25	1471.25	0.00126693	2.72328	Dzip3
1423065_at	gb:BB044612 /DB_XREF=gi:15403931 /DB_XREF=BB044612 /CLONE=6030489E13 /FEA=FLmRNA /CNT=313 /TID=Mm.5001.1 /TIER=Stack /STK=10 /UG=Mm.5001 /LL=13435 /UG_GENE=Dnmt3a /UG_TITLE=DNA methyltransferase 3A /FL=gb:BC007466.1 gb:AF068625.2 gb:NM_007872.1	101.25	234.35	0.00149811	2.31457	101.25	497.85	0.00306691	4.91704	Dnmt3a
1421929_at	gb:BB706548 /DB_XREF=gi:16055383 /DB_XREF=BB706548 /CLONE=7420491D14 /FEA=FLmRNA /CNT=39 /TID=Mm.3249.1 /TIER=Stack /STK=18 /UG=Mm.3249 /LL=13838 /UG_GENE=Epha4 /UG_TITLE=Eph receptor A4 /FL=gb:NM_007936.1 gb:BC004782.1	413	955.9	0.00508693	2.31453	413	2338.75	0.00327791	5.66283	Epha4
1452089_at	gb:AW106929 /DB_XREF=gi:6077729 /DB_XREF=um34d04.x1 /CLONE=IMAGE:2236423 /FEA=FLmRNA /CNT=79 /TID=Mm.28404.1 /TIER=Stack /STK=71 /UG=Mm.28404 /UG_TITLE=Mus musculus, clone MGC:31529 IMAGE:4501980, mRNA, complete cds /FL=gb:BC026479.1	891.75	2049.45	0.00133497	2.29823	891.75	2582.7	0.00114666	2.89622	Cacnb4
1424598_at	gb:BC021452.1 /DB_XREF=gi:18203916 /FEA=FLmRNA /CNT=56 /TID=Mm.157743.1 /TIER=FL+Stack /STK=23 /UG=Mm.157743 /LL=13209 /UG_GENE=Ddx6 /DEF=Mus musculus, DEAD (aspartate-glutamate-alanine-aspartate) box polypeptide 6, clone MGC:29113 IMAGE:5043599, mRNA, complete cds. /PROD=DEAD (aspartate-glutamate-alanine-aspartate) boxpolypeptide 6 /FL=gb:BC021452.1	406.15	931.45	0.000383015	2.29336	406.15	2795.8	0.000210448	6.88366	Ddx6
1456088_at	gb:BF134200 /DB_XREF=gi:10973240 /DB_XREF=601778893F1 /CLONE=IMAGE:4007134 /FEA=EST /CNT=157 /TID=Mm.149115.6 /TIER=Stack /STK=16 /UG=Mm.149115 /LL=11798 /UG_GENE=Birc4 /UG_TITLE=baculoviral IAP repeat-containing 4	188.8	427.1	0.00240807	2.26218	188.8	632.4	0.000362079	3.34958	Xiap
1449961_at	gb:NM_011286.1 /DB_XREF=gi:16945961 /GEN=Rph3a /FEA=FLmRNA /CNT=11 /TID=Mm.181166.1 /TIER=FL /STK=3 /UG=Mm.181166 /LL=19894 /DEF=Mus musculus rabphilin 3A (Rph3a), mRNA. /PROD=rabphilin 3A /FL=gb:D29965.1 gb:NM_011286.1	407.3	912.4	0.000203881	2.24012	407.3	1520.3	0.000154024	3.73263	Rph3a
1427542_at	gb:BC027318.1 /DB_XREF=gi:20071233 /FEA=mRNA /CNT=5 /TID=Mm.153750.1 /TIER=ConsEnd /STK=0 /UG=Mm.153750 /UG_TITLE=Mus musculus, clone IMAGE:3980989, mRNA /DEF=Mus musculus, clone IMAGE:3980989, mRNA.	506.05	1127.55	0.0045354	2.22814	506.05	1508.25	0.00974653	2.98044	Sobp
1435520_at	gb:BB418489 /DB_XREF=gi:16423415 /DB_XREF=BB418489 /CLONE=C530010I15 /FEA=EST /CNT=101 /TID=Mm.35930.1 /TIER=Stack /STK=15 /UG=Mm.35930 /LL=103787 /UG_GENE=AI563628 /UG_TITLE=expressed sequence AI563628	277.7	618.05	0.00160948	2.2256	277.7	708.75	0.00931376	2.55221	Msi2
1416779_at	gb:BE197945 /DB_XREF=gi:8710114 /DB_XREF=ug76h12.x1 /CLONE=IMAGE:1548359 /FEA=FLmRNA /CNT=150 /TID=Mm.220962.1 /TIER=Stack /STK=10 /UG=Mm.220962 /LL=20324 /UG_GENE=Sdpr /UG_TITLE=serum deprivation response /FL=gb:NM_138741.1 gb:BC027005.1 gb:BC020008.1	123.5	271.55	0.00106651	2.19879	123.5	297.8	0.00482331	2.41134	Sdpr
1438363_at	gb:BB332375 /DB_XREF=gi:9041138 /DB_XREF=BB332375 /CLONE=B730047G02 /FEA=EST /CNT=11 /TID=Mm.131907.1 /TIER=Stack /STK=11 /UG=Mm.131907 /UG_TITLE=ESTs, Weakly similar to KIAA1183 protein (H.sapiens)	136.3	299.3	0.00497464	2.19589	136.3	917.7	0.000998566	6.73294	BB332375
1457744_at	gb:BG243238 /DB_XREF=gi:12753053 /DB_XREF=602355656F1 /CLONE=IMAGE:4484196 /FEA=EST /CNT=6 /TID=Mm.212498.1 /TIER=ConsEnd /STK=3 /UG=Mm.212498 /UG_TITLE=ESTs, Moderately similar to A57514 RNA helicase HEL117 - rat (R.norvegicus)	57.2	125.25	0.00550701	2.18969	57.2	205.95	0.000517184	3.60052	Ddx46
1431804_a_at	gb:AK004607.1 /DB_XREF=gi:12835892 /FEA=mRNA /CNT=1 /TID=Mm.28513.2 /TIER=ConsEnd /STK=0 /UG=Mm.28513 /LL=20687 /UG_GENE=Sp3 /UG_TITLE=trans-acting transcription factor 3 /DEF=Mus musculus adult male lung cDNA, RIKEN full-length enriched library, clone:1200006A08:trans-acting transcription factor 3, full insert sequence.	522.7	1139.5	0.00445723	2.18003	522.7	1307	0.000828271	2.50048	Sp3
1418141_at	gb:BM115908 /DB_XREF=gi:17078926 /DB_XREF=L0827D09-3 /CLONE=L0827D09 /FEA=FLmRNA /CNT=90 /TID=Mm.12871.1 /TIER=Stack /STK=10 /UG=Mm.12871 /LL=13193 /UG_GENE=Dcx /UG_TITLE=doublecortin /FL=gb:AB011678.1 gb:AF045547.1 gb:NM_010025.1	186.2	402.6	0.00272327	2.16219	186.2	431.95	0.000914167	2.31982	Dcx
1422834_at	gb:NM_019697.1 /DB_XREF=gi:9790092 /GEN=Kcnd2 /FEA=FLmRNA /CNT=51 /TID=Mm.132309.1 /TIER=FL+Stack /STK=10 /UG=Mm.132309 /LL=16508 /DEF=Mus musculus potassium voltage-gated channel, Shal-related family, member 2 (Kcnd2), mRNA. /PROD=potassium voltage-gated channel, Shal-relatedfamily, member 2 /FL=gb:AF107780.1 gb:NM_019697.1	584.95	1264.75	0.000307538	2.16215	584.95	2094.85	6.22308e-06	3.58125	Kcnd2
1436898_at	gb:BI738328 /DB_XREF=gi:15715341 /DB_XREF=603361584F1 /CLONE=IMAGE:5368748 /FEA=EST /CNT=50 /TID=Mm.43213.3 /TIER=Stack /STK=37 /UG=Mm.43213 /LL=71514 /UG_GENE=9030402K04Rik /UG_TITLE=RIKEN cDNA 9030402K04 gene	334.75	718.9	0.00519359	2.14757	334.75	841.95	0.00143591	2.51516	603361584F1
1421534_at	gb:NM_008016.1 /DB_XREF=gi:6679796 /GEN=Fin15 /FEA=FLmRNA /CNT=5 /TID=Mm.3421.1 /TIER=FL /STK=2 /UG=Mm.3421 /LL=14210 /DEF=Mus musculus fibroblast growth factor inducible 15 (Fin15), mRNA. /PROD=fibroblast growth factor inducible 15 /FL=gb:NM_008016.1 gb:U42384.1	826.1	1770.55	0.00522675	2.14326	826.1	1779.7	0.00207413	2.15434	Mpp6
1436746_at	gb:BI692255 /DB_XREF=gi:15654884 /DB_XREF=603342721F1 /CLONE=IMAGE:5370700 /FEA=EST /CNT=96 /TID=Mm.27341.1 /TIER=Stack /STK=69 /UG=Mm.27341 /UG_TITLE=ESTs, Moderately similar to protein kinase, lysine deficient 1 (Rattus norvegicus) (R.norvegicus)	533.65	1136.05	0.00669032	2.12883	533.65	3708.7	0.000283227	6.94969	Wnk1
1425533_a_at	gb:BC025118.1 /DB_XREF=gi:19264082 /FEA=FLmRNA /CNT=45 /TID=Mm.41481.2 /TIER=FL /STK=1 /UG=Mm.41481 /LL=29819 /UG_GENE=Stau2 /DEF=Mus musculus, Similar to staufen, RNA binding protein, homolog 2 (Drosophila), clone MGC:36821 IMAGE:3670067, mRNA, complete cds. /PROD=Similar to staufen, RNA binding protein, homolog2 (Drosophila) /FL=gb:BC025118.1	1341.95	2824.05	0.00010122	2.10444	1341.95	4204.4	0.000419316	3.13305	Stau2
1457045_at	gb:BB632261 /DB_XREF=gi:16468873 /DB_XREF=BB632261 /CLONE=A230020F20 /FEA=EST /CNT=12 /TID=Mm.156869.1 /TIER=ConsEnd /STK=5 /UG=Mm.156869 /LL=99464 /UG_GENE=BB182356 /UG_TITLE=expressed sequence BB182356	115.9	243.6	0.00152787	2.10181	115.9	311.3	0.00546197	2.68594	Galnt13
1418230_a_at	gb:BC005621.1 /DB_XREF=gi:13542843 /FEA=FLmRNA /CNT=178 /TID=Mm.29097.1 /TIER=FL+Stack /STK=27 /UG=Mm.29097 /LL=110829 /UG_GENE=Lims1l /DEF=Mus musculus, RIKEN cDNA 4921524A02 gene, clone MGC:11585 IMAGE:3711611, mRNA, complete cds. /PROD=RIKEN cDNA 4921524A02 gene /FL=gb:NM_026148.1 gb:BC005621.1	153.95	322.95	0.00288695	2.09776	153.95	409.85	0.00392155	2.66223	Lims1l
1422748_at	gb:NM_015753.1 /DB_XREF=gi:7657694 /GEN=Zfhx1b /FEA=FLmRNA /CNT=37 /TID=Mm.37676.1 /TIER=FL+Stack /STK=15 /UG=Mm.37676 /LL=24136 /DEF=Mus musculus zinc finger homeobox 1b (Zfhx1b), mRNA. /PROD=zinc finger homeobox 1b /FL=gb:NM_015753.1 gb:AF033116.1	1514.15	3174.9	0.00409683	2.09682	1514.15	5427.6	0.00197624	3.58459	Zfhx1b
1437107_at	gb:BB398063 /DB_XREF=gi:16412364 /DB_XREF=BB398063 /CLONE=C330006L04 /FEA=EST /CNT=110 /TID=Mm.193647.1 /TIER=Stack /STK=13 /UG=Mm.193647 /LL=52848 /UG_GENE=D9Bwg0185e /UG_TITLE=DNA segment, Chr 9, Brigham & Womens Genetics 0185 expressed	371.45	776.05	0.00235789	2.08924	371.45	2670	2.54417e-05	7.18805	Rab6b
1444058_at	gb:BM231657 /DB_XREF=gi:17866927 /DB_XREF=K0312G04-3 /CLONE=K0312G04 /FEA=EST /CNT=10 /TID=Mm.86668.1 /TIER=ConsEnd /STK=2 /UG=Mm.86668 /UG_TITLE=ESTs, Moderately similar to T00362 hypothetical protein KIAA0675 (H.sapiens)	282	584.55	0.00782696	2.07287	282	911.8	0.000549035	3.23333	Dzip3
1423597_at	gb:BB303874 /DB_XREF=gi:15411244 /DB_XREF=BB303874 /CLONE=B230107D19 /FEA=FLmRNA /CNT=81 /TID=Mm.33083.1 /TIER=Stack /STK=9 /UG=Mm.33083 /LL=11980 /UG_GENE=Atp8a1 /UG_TITLE=ATPase, aminophospholipid transporter (APLT), class I, type 8A, member 1 /FL=gb:NM_009727.1 gb:U75321.1	1472.45	3048.4	0.00012248	2.07029	1472.45	6920.6	0.000191246	4.70006	Atp3a2
1437179_at	gb:BG070871 /DB_XREF=gi:12553528 /DB_XREF=H3093B06-3 /CLONE=H3093B06 /FEA=EST /CNT=33 /TID=Mm.12647.1 /TIER=Stack /STK=23 /UG=Mm.12647 /UG_TITLE=ESTs, Moderately similar to unnamed protein product (H.sapiens)	233.95	481.75	0.00451364	2.0592	233.95	639.6	0.000902841	2.73392	Rif1
1456419_at	gb:BI108098 /DB_XREF=gi:14558991 /DB_XREF=602902496F1 /CLONE=IMAGE:5032198 /FEA=EST /CNT=41 /TID=Mm.86860.2 /TIER=Stack /STK=10 /UG=Mm.86860 /LL=70591 /UG_GENE=5730455P16Rik /UG_TITLE=RIKEN cDNA 5730455P16 gene	847.45	1739.05	0.00650108	2.0521	847.45	2020.8	0.00670559	2.38457	5730455P16Rik
1417135_at	gb:BG805074 /DB_XREF=gi:17952002 /DB_XREF=0612-12 /FEA=FLmRNA /CNT=188 /TID=Mm.8709.1 /TIER=Stack /STK=35 /UG=Mm.8709 /LL=20817 /UG_GENE=Srpk2 /UG_TITLE=serinearginine-rich protein specific kinase 2 /FL=gb:AB006036.1 gb:BC020178.1 gb:NM_009274.1	1940.6	3974.6	0.00267843	2.04813	1940.6	4242.4	0.00662772	2.18613	Srpk2
1450368_a_at	gb:NM_024459.1 /DB_XREF=gi:13277369 /GEN=Ppp3r1 /FEA=FLmRNA /CNT=2 /TID=Mm.41840.1 /TIER=FL /STK=2 /UG=Mm.41840 /LL=19058 /DEF=Mus musculus protein phospatase 3, regulatory subunit B, alpha isoform (calcineurin B, type I) (Ppp3r1), mRNA. /PROD=protein phospatase 3, regulatory subunit B,alpha isoform (calcineurin B, type I) /FL=gb:NM_024459.1 gb:BC002267.1	199.6	408.75	0.00992042	2.04785	199.6	473.2	0.00710414	2.37074	Cnb1
1434752_at	gb:BQ174259 /DB_XREF=gi:20349750 /DB_XREF=UI-M-DJ2-bvx-f-07-0-UI.s1 /CLONE=UI-M-DJ2-bvx-f-07-0-UI /FEA=EST /CNT=80 /TID=Mm.12236.3 /TIER=Stack /STK=25 /UG=Mm.12236 /LL=22680 /UG_GENE=Zfp207 /UG_TITLE=zinc finger protein 207	56.1	114.45	0.00346647	2.04011	56.1	118.2	0.00707091	2.10695	Zfp207
1456054_a_at	gb:BB314559 /DB_XREF=gi:9015264 /DB_XREF=BB314559 /CLONE=B230348A11 /FEA=EST /CNT=18 /TID=Mm.34701.2 /TIER=Stack /STK=18 /UG=Mm.34701 /LL=80912 /UG_GENE=Pum1 /UG_TITLE=pumilio 1 (Drosophila)	1739.5	3546.4	0.00510847	2.03875	1739.5	3810.35	0.00155458	2.19049	Pum1
1424342_at	gb:BC010204.1 /DB_XREF=gi:16307329 /FEA=FLmRNA /CNT=255 /TID=Mm.12831.1 /TIER=FL+Stack /STK=36 /UG=Mm.12831 /LL=70705 /UG_GENE=3830421F13Rik /DEF=Mus musculus, RIKEN cDNA 3830421F13 gene, clone MGC:7144 IMAGE:3158224, mRNA, complete cds. /PROD=RIKEN cDNA 3830421F13 gene /FL=gb:BC010204.1	975.45	1982.65	0.000153619	2.03255	975.45	3338.8	0.0097524	3.42283	Fyttd1
1437641_at	gb:BE981473 /DB_XREF=gi:10650615 /DB_XREF=UI-M-CG0p-bdc-e-12-0-UI.s1 /CLONE=UI-M-CG0p-bdc-e-12-0-UI /FEA=EST /CNT=28 /TID=Mm.21524.1 /TIER=Stack /STK=15 /UG=Mm.21524 /LL=99938 /UG_GENE=BB077382 /UG_TITLE=expressed sequence BB077382	75.9	154	0.000695879	2.02899	75.9	152.7	0.000719611	2.01186	Rprd2
1438039_at	gb:BE630599 /DB_XREF=gi:9913287 /DB_XREF=uu38b09.x1 /CLONE=IMAGE:3374201 /FEA=EST /CNT=21 /TID=Mm.36670.1 /TIER=Stack /STK=12 /UG=Mm.36670 /LL=104890 /UG_GENE=AI844876 /UG_TITLE=expressed sequence AI844876	546.3	1103.65	0.00733231	2.02023	546.3	2026.35	0.000113023	3.70923	Hectd1
1457275_at	gb:AI594683 /DB_XREF=gi:4603731 /DB_XREF=vt55h01.x1 /CLONE=IMAGE:1167025 /FEA=EST /CNT=10 /TID=Mm.83561.1 /TIER=ConsEnd /STK=4 /UG=Mm.83561 /UG_TITLE=ESTs	627.15	1265.45	0.00762269	2.01778	627.15	1648.15	0.000454931	2.628	Dmn
1431403_a_at	gb:AK019929.1 /DB_XREF=gi:12860336 /FEA=mRNA /CNT=3 /TID=Mm.160079.2 /TIER=ConsEnd /STK=0 /UG=Mm.160079 /LL=78283 /UG_GENE=5330432J06Rik /UG_TITLE=RIKEN cDNA 5330432J06 gene /DEF=Mus musculus adult male pituitary gland cDNA, RIKEN full-length enriched library, clone:5330432J06:hypothetical protein, full insert sequence.	800.35	1613.65	0.00329302	2.01618	800.35	2249.85	0.00296763	2.81108	Map7d2
1448794_s_at	gb:BG067003 /DB_XREF=gi:12549572 /DB_XREF=H3049E03-3 /CLONE=H3049E03 /FEA=FLmRNA /CNT=94 /TID=Mm.2467.1 /TIER=Stack /STK=8 /UG=Mm.2467 /LL=22792 /UG_GENE=Zrf2 /UG_TITLE=zuotin related factor 2 /FL=gb:NM_009584.1 gb:D63784.1	363.75	729.5	0.00748941	2.0055	363.75	997.1	0.00929416	2.74117	Dnajc2
1426777_a_at	gb:BF466143 /DB_XREF=gi:11535326 /DB_XREF=UI-M-CG0p-bqu-a-07-0-UI.s1 /CLONE=UI-M-CG0p-bqu-a-07-0-UI /FEA=mRNA /CNT=165 /TID=Mm.1574.1 /TIER=Stack /STK=30 /UG=Mm.1574 /LL=73178 /UG_GENE=Wasl /UG_TITLE=Wiskott-Aldrich syndrome-like (human)	726.2	1456.25	0.00296789	2.0053	726.2	3073.65	0.000163624	4.23251	Wasl
