# Supplementary material for: ACE Inhibition with Captopril Retards the Development of Signs of Neurodegeneration in an Animal Model of Alzheimer’s Disease
Source: Int J Mol Sci. 2013 Aug 16;14(8):16917–42. doi: 10.3390/ijms140816917 (PMC3759943; doi:10.3390/ijms140816917)
Supplement: Supplementary File 5 — Supplementary5 (XLS, 47 KB) [file ijms-14-16917-s005.xls]

## Sheet: Blatt1
Table S5. Hippocampal probe sets with involvement in neuronal regeneration and concordantly increased expression (One-way ANOVA, p-values based on F-distribution) in captopril-treated 18 month-old Tg2576 (Tg-18mo-ACEI) and 12 month-old Tg2576 (Tg-12mo) mice relative to 18 month-old Tg2576 mice (Tg-18mo).
Affymetrix-ID	Descriptions	Mean Tg-18mo	Mean Tg-18mo-ACEI	Mean Tg-12mo	ANOVA (p value based on F-distribution)	Tg-18mo-1	Tg-18mo-2	Tg-18mo-ACEI-1	Tg-18mo-ACEI-2	Tg-12mo-1	Tg-12mo-2	Gene name
1422748_at	gb:NM_015753.1 /DB_XREF=gi:7657694 /GEN=Zfhx1b /FEA=FLmRNA /CNT=37 /TID=Mm.37676.1 /TIER=FL+Stack /STK=15 /UG=Mm.37676 /LL=24136 /DEF=Mus musculus zinc finger homeobox 1b (Zfhx1b), mRNA. /PROD=zinc finger homeobox 1b /FL=gb:NM_015753.1 gb:AF033116.1	1514.15	5427.6	3174.9	0.000245993	1407.8	1620.5	5565.6	5289.6	3182.5	3167.3	Zfhx1b
1427542_at	gb:BC027318.1 /DB_XREF=gi:20071233 /FEA=mRNA /CNT=5 /TID=Mm.153750.1 /TIER=ConsEnd /STK=0 /UG=Mm.153750 /UG_TITLE=Mus musculus, clone IMAGE:3980989, mRNA /DEF=Mus musculus, clone IMAGE:3980989, mRNA.	506.05	1508.25	1127.55	0.00333812	508.1	504	1607.9	1408.6	1085.6	1169.5	Sobp
1431804_a_at	gb:AK004607.1 /DB_XREF=gi:12835892 /FEA=mRNA /CNT=1 /TID=Mm.28513.2 /TIER=ConsEnd /STK=0 /UG=Mm.28513 /LL=20687 /UG_GENE=Sp3 /UG_TITLE=trans-acting transcription factor 3 /DEF=Mus musculus adult male lung cDNA, RIKEN full-length enriched library, clone:1200006A08:trans-acting transcription factor 3, full insert sequence.	522.7	1307	1139.5	0.000375294	543.5	501.9	1298.2	1315.8	1103.8	1175.2	Sp3
1437801_at	gb:BM115860 /DB_XREF=gi:17078878 /DB_XREF=L0826E05-3 /CLONE=L0826E05 /FEA=EST /CNT=15 /TID=Mm.196508.8 /TIER=Stack /STK=14 /UG=Mm.196508 /LL=21761 /UG_GENE=Tex189 /UG_TITLE=testis expressed gene 189	1886.05	3770.65	6523.3	0.00138712	1744.7	2027.4	3836.4	3704.9	6187.6	6859	Morf4l1
1418141_at	gb:BM115908 /DB_XREF=gi:17078926 /DB_XREF=L0827D09-3 /CLONE=L0827D09 /FEA=FLmRNA /CNT=90 /TID=Mm.12871.1 /TIER=Stack /STK=10 /UG=Mm.12871 /LL=13193 /UG_GENE=Dcx /UG_TITLE=doublecortin /FL=gb:AB011678.1 gb:AF045547.1 gb:NM_010025.1	186.2	431.95	402.6	0.000250277	192.5	179.9	435.9	428	393.2	412	Dcx
1418431_at	gb:BI328541 /DB_XREF=gi:15013198 /DB_XREF=602985332F1 /CLONE=IMAGE:5138167 /FEA=FLmRNA /CNT=397 /TID=Mm.3380.1 /TIER=Stack /STK=11 /UG=Mm.3380 /LL=16573 /UG_GENE=Kif5b /UG_TITLE=kinesin family member 5B /FL=gb:NM_008448.1 gb:U86090.1	441.05	1974.55	1309.55	0.000143927	456.1	426	1990.3	1958.8	1256.8	1362.3	Kif5b
1419038_a_at	gb:BB283759 /DB_XREF=gi:8984208 /DB_XREF=BB283759 /CLONE=A930103E12 /FEA=FLmRNA /CNT=162 /TID=Mm.23692.1 /TIER=Stack /STK=8 /UG=Mm.23692 /LL=12999 /UG_GENE=Csnk2a1-rs4 /UG_TITLE=casein kinase II, alpha 1 related sequence 4 /FL=gb:NM_007788.1 gb:U51866.1 gb:BC026149.1	870.4	3762.2	2290.3	9.54404e-05	879.9	860.9	3689.9	3834.5	2348.9	2231.7	Csnk2a1
1422553_at	gb:NM_008960.1 /DB_XREF=gi:6679522 /GEN=Pten /FEA=FLmRNA /CNT=146 /TID=Mm.1591.1 /TIER=FL+Stack /STK=37 /UG=Mm.1591 /LL=19211 /DEF=Mus musculus phosphatase and tensin homolog (Pten), mRNA. /PROD=phosphatase and tensin homolog /FL=gb:BC021445.1 gb:NM_008960.1 gb:U92437.1	1013.2	3845.15	2828.25	5.8551e-06	1044.6	981.8	3845.4	3844.9	2809.5	2847	Pten
1425533_a_at	gb:BC025118.1 /DB_XREF=gi:19264082 /FEA=FLmRNA /CNT=45 /TID=Mm.41481.2 /TIER=FL /STK=1 /UG=Mm.41481 /LL=29819 /UG_GENE=Stau2 /DEF=Mus musculus, Similar to staufen, RNA binding protein, homolog 2 (Drosophila), clone MGC:36821 IMAGE:3670067, mRNA, complete cds. /PROD=Similar to staufen, RNA binding protein, homolog2 (Drosophila) /FL=gb:BC025118.1	1341.95	4204.4	2824.05	2.5719e-05	1332.8	1351.1	4262.3	4146.5	2812.3	2835.8	Stau2
1425597_a_at	gb:AW060288 /DB_XREF=gi:6008004 /DB_XREF=UI-M-BH1-amv-b-05-0-UI.s1 /CLONE=UI-M-BH1-amv-b-05-0-UI /FEA=FLmRNA /CNT=22 /TID=Mm.2655.3 /TIER=Stack /STK=10 /UG=Mm.2655 /LL=19317 /UG_GENE=qk /UG_TITLE=quaking /FL=gb:U44940.1	281.05	1283.7	782.05	0.000828079	249.7	312.4	1232.1	1335.3	810.8	753.3	Qk
1426114_at	gb:L36663.1 /DB_XREF=gi:840647 /FEA=FLmRNA /CNT=1 /TID=MmAffx.1.19 /TIER=FL /STK=1 /NOTE=sequence(s) not in UniGene /DEF=Mus musculus CArG box-binding factor mRNA, complete cds. /PROD=CArG box-binding factor /FL=gb:L36663.1	2549.95	5837.95	11374.6	4.40262e-06	2559.6	2540.3	5801.2	5874.7	11278.4	11470.7	Hnrnpab
1426777_a_at	gb:BF466143 /DB_XREF=gi:11535326 /DB_XREF=UI-M-CG0p-bqu-a-07-0-UI.s1 /CLONE=UI-M-CG0p-bqu-a-07-0-UI /FEA=mRNA /CNT=165 /TID=Mm.1574.1 /TIER=Stack /STK=30 /UG=Mm.1574 /LL=73178 /UG_GENE=Wasl /UG_TITLE=Wiskott-Aldrich syndrome-like (human)	726.2	3073.65	1456.25	2.28476e-05	713.4	739	3100.8	3046.5	1494	1418.5	Wasl
1435520_at	gb:BB418489 /DB_XREF=gi:16423415 /DB_XREF=BB418489 /CLONE=C530010I15 /FEA=EST /CNT=101 /TID=Mm.35930.1 /TIER=Stack /STK=15 /UG=Mm.35930 /LL=103787 /UG_GENE=AI563628 /UG_TITLE=expressed sequence AI563628	277.7	708.75	618.05	0.00228415	288.6	266.8	749.2	668.3	626.3	609.8	Msi2
1435521_at	gb:BQ174527 /DB_XREF=gi:20350018 /DB_XREF=UI-M-DJ2-bvy-k-08-0-UI.s1 /CLONE=UI-M-DJ2-bvy-k-08-0-UI /FEA=EST /CNT=101 /TID=Mm.35930.1 /TIER=Stack /STK=60 /UG=Mm.35930 /LL=103787 /UG_GENE=AI563628 /UG_TITLE=expressed sequence AI563628	156.7	716.3	987.1	0.000503007	148.7	164.7	745.2	687.4	1024.3	949.9	Msi2
1436746_at	gb:BI692255 /DB_XREF=gi:15654884 /DB_XREF=603342721F1 /CLONE=IMAGE:5370700 /FEA=EST /CNT=96 /TID=Mm.27341.1 /TIER=Stack /STK=69 /UG=Mm.27341 /UG_TITLE=ESTs, Moderately similar to protein kinase, lysine deficient 1 (Rattus norvegicus) (R.norvegicus)	533.65	3708.7	1136.05	1.13442e-05	583	484.3	3688.2	3729.2	1131.9	1140.2	Wnk1
1436850_at	gb:AV338277 /DB_XREF=gi:16396655 /DB_XREF=AV338277 /CLONE=6430408F09 /FEA=EST /CNT=85 /TID=Mm.122091.1 /TIER=Stack /STK=43 /UG=Mm.122091 /UG_TITLE=ESTs, Weakly similar to cellular repressor of E1A-stimulated genes (Mus musculus) (M.musculus)	100.6	954.9	383.9	0.00149338	101.3	99.9	1023.8	886	400.2	367.6	Creg2
1437107_at	gb:BB398063 /DB_XREF=gi:16412364 /DB_XREF=BB398063 /CLONE=C330006L04 /FEA=EST /CNT=110 /TID=Mm.193647.1 /TIER=Stack /STK=13 /UG=Mm.193647 /LL=52848 /UG_GENE=D9Bwg0185e /UG_TITLE=DNA segment, Chr 9, Brigham & Womens Genetics 0185 expressed	371.45	2670	776.05	1.57955e-06	382.1	360.8	2674.6	2665.4	759.5	792.6	Rab6b
1438039_at	gb:BE630599 /DB_XREF=gi:9913287 /DB_XREF=uu38b09.x1 /CLONE=IMAGE:3374201 /FEA=EST /CNT=21 /TID=Mm.36670.1 /TIER=Stack /STK=12 /UG=Mm.36670 /LL=104890 /UG_GENE=AI844876 /UG_TITLE=expressed sequence AI844876	546.3	2026.35	1103.65	9.38972e-05	561.7	530.9	2029.6	2023.1	1058.2	1149.1	Hectd1
1447763_at	gb:AV160090 /DB_XREF=gi:5403725 /DB_XREF=AV160090 /CLONE=3010040M24 /FEA=EST /CNT=2 /TID=Mm.45283.1 /TIER=ConsEnd /STK=2 /UG=Mm.45283 /UG_TITLE=ESTs	468.15	1113.6	2184.4	0.00017782	473.9	462.4	1107.1	1120.1	2252.9	2115.9	Snap25
1448885_at	gb:BB645629 /DB_XREF=gi:15402342 /DB_XREF=BB645629 /CLONE=B430305J03 /FEA=FLmRNA /CNT=101 /TID=Mm.26939.1 /TIER=Stack /STK=25 /UG=Mm.26939 /LL=74012 /UG_GENE=Rap2b /UG_TITLE=RAP2B, member of RAS oncogene family /FL=gb:NM_028712.1	639.2	1823.4	1576.9	0.000389121	587.6	690.8	1829	1817.8	1615.5	1538.3	Rap2b
1449961_at	gb:NM_011286.1 /DB_XREF=gi:16945961 /GEN=Rph3a /FEA=FLmRNA /CNT=11 /TID=Mm.181166.1 /TIER=FL /STK=3 /UG=Mm.181166 /LL=19894 /DEF=Mus musculus rabphilin 3A (Rph3a), mRNA. /PROD=rabphilin 3A /FL=gb:D29965.1 gb:NM_011286.1	407.3	1520.3	912.4	5.40359e-06	400.1	414.5	1532.1	1508.5	911.9	912.9	Rph3a
1450368_a_at	gb:NM_024459.1 /DB_XREF=gi:13277369 /GEN=Ppp3r1 /FEA=FLmRNA /CNT=2 /TID=Mm.41840.1 /TIER=FL /STK=2 /UG=Mm.41840 /LL=19058 /DEF=Mus musculus protein phospatase 3, regulatory subunit B, alpha isoform (calcineurin B, type I) (Ppp3r1), mRNA. /PROD=protein phospatase 3, regulatory subunit B,alpha isoform (calcineurin B, type I) /FL=gb:NM_024459.1 gb:BC002267.1	199.6	473.2	408.75	0.00291611	210.8	188.4	493.5	452.9	426.5	391	Cnb1
1452722_a_at	gb:BB702110 /DB_XREF=gi:16050934 /DB_XREF=BB702110 /CLONE=7420437M16 /FEA=mRNA /CNT=238 /TID=Mm.46579.1 /TIER=Stack /STK=62 /UG=Mm.46579 /LL=75717 /UG_GENE=4921514I20Rik /UG_TITLE=RIKEN cDNA 4921514I20 gene	147.5	705.5	430.65	0.000175306	168.8	126.2	709.1	701.9	425.9	435.4	Cul5
1456088_at	gb:BF134200 /DB_XREF=gi:10973240 /DB_XREF=601778893F1 /CLONE=IMAGE:4007134 /FEA=EST /CNT=157 /TID=Mm.149115.6 /TIER=Stack /STK=16 /UG=Mm.149115 /LL=11798 /UG_GENE=Birc4 /UG_TITLE=baculoviral IAP repeat-containing 4	188.8	632.4	427.1	9.19696e-05	186.1	191.5	640.4	624.4	438.5	415.7	Xiap
1456656_at	gb:AI848705 /DB_XREF=gi:5492611 /DB_XREF=UI-M-AH1-agv-h-06-0-UI.s1 /CLONE=UI-M-AH1-agv-h-06-0-UI /FEA=EST /CNT=10 /TID=Mm.40698.1 /TIER=Stack /STK=8 /UG=Mm.40698 /LL=103301 /UG_GENE=AI848705 /UG_TITLE=expressed sequence AI848705	208.85	827.5	537	0.000293114	225	192.7	844.4	810.6	519.6	554.4	Veli1
1456911_at	gb:BB831639 /DB_XREF=gi:17009882 /DB_XREF=BB831639 /CLONE=G930018E16 /FEA=EST /CNT=8 /TID=Mm.214961.1 /TIER=ConsEnd /STK=6 /UG=Mm.214961 /UG_TITLE=ESTs, Weakly similar to T00386 hypothetical protein KIAA0627 (H.sapiens)	66.7	245.95	170.8	0.00208338	72	61.4	232.6	259.3	162.9	178.7	Clasp2
1418230_a_at	gb:BC005621.1 /DB_XREF=gi:13542843 /FEA=FLmRNA /CNT=178 /TID=Mm.29097.1 /TIER=FL+Stack /STK=27 /UG=Mm.29097 /LL=110829 /UG_GENE=Lims1l /DEF=Mus musculus, RIKEN cDNA 4921524A02 gene, clone MGC:11585 IMAGE:3711611, mRNA, complete cds. /PROD=RIKEN cDNA 4921524A02 gene /FL=gb:NM_026148.1 gb:BC005621.1	153.95	409.85	322.95	0.000669014	162.9	145	396.5	423.2	324.6	321.3	Lims1l
1420402_at	gb:NM_009723.1 /DB_XREF=gi:6753139 /GEN=Atp2b2 /FEA=FLmRNA /CNT=26 /TID=Mm.20441.1 /TIER=FL /STK=5 /UG=Mm.20441 /LL=11941 /DEF=Mus musculus ATPase, Ca++ transporting, plasma membrane 2 (Atp2b2), mRNA. /PROD=ATPase, Ca++ transporting, plasma membrane 2 /FL=gb:AF053471.1 gb:NM_009723.1 gb:AB030738.1 gb:AB030737.1	517.8	2312.9	2565.7	3.65142e-05	566.1	469.5	2329.9	2295.9	2576.9	2554.5	Atp2b2
1421929_at	gb:BB706548 /DB_XREF=gi:16055383 /DB_XREF=BB706548 /CLONE=7420491D14 /FEA=FLmRNA /CNT=39 /TID=Mm.3249.1 /TIER=Stack /STK=18 /UG=Mm.3249 /LL=13838 /UG_GENE=Epha4 /UG_TITLE=Eph receptor A4 /FL=gb:NM_007936.1 gb:BC004782.1	413	2338.75	955.9	0.000562827	426.9	399.1	2448.4	2229.1	919.6	992.2	Epha4
1422834_at	gb:NM_019697.1 /DB_XREF=gi:9790092 /GEN=Kcnd2 /FEA=FLmRNA /CNT=51 /TID=Mm.132309.1 /TIER=FL+Stack /STK=10 /UG=Mm.132309 /LL=16508 /DEF=Mus musculus potassium voltage-gated channel, Shal-related family, member 2 (Kcnd2), mRNA. /PROD=potassium voltage-gated channel, Shal-relatedfamily, member 2 /FL=gb:AF107780.1 gb:NM_019697.1	584.95	2094.85	1264.75	1.47347e-06	587.9	582	2092.4	2097.3	1253.2	1276.3	Kcnd2
1423559_at	gb:BB750192 /DB_XREF=gi:16154428 /DB_XREF=BB750192 /CLONE=G130002F04 /FEA=FLmRNA /CNT=23 /TID=Mm.1926.1 /TIER=Stack /STK=11 /UG=Mm.1926 /LL=16502 /UG_GENE=Kcnc1 /UG_TITLE=potassium voltage gated channel, Shaw-related subfamily, member 1 /FL=gb:NM_008421.1	696.9	2099.05	999.35	0.000246588	649.9	743.9	2054.3	2143.8	990	1008.7	Kcnc1
1423597_at	gb:BB303874 /DB_XREF=gi:15411244 /DB_XREF=BB303874 /CLONE=B230107D19 /FEA=FLmRNA /CNT=81 /TID=Mm.33083.1 /TIER=Stack /STK=9 /UG=Mm.33083 /LL=11980 /UG_GENE=Atp8a1 /UG_TITLE=ATPase, aminophospholipid transporter (APLT), class I, type 8A, member 1 /FL=gb:NM_009727.1 gb:U75321.1	1472.45	6920.6	3048.4	6.91242e-06	1489	1455.9	6994.1	6847.1	3053.9	3042.9	Atp3a2
1439940_at	gb:AV328280 /DB_XREF=gi:15406324 /DB_XREF=AV328280 /CLONE=6330440N14 /FEA=EST /CNT=7 /TID=Mm.44658.1 /TIER=ConsEnd /STK=6 /UG=Mm.44658 /UG_TITLE=ESTs	2005.15	6287.55	5778.6	0.000623906	2151.6	1858.7	6186.9	6388.2	5557.4	5999.8	Slc1a2
1441728_at	gb:BI731739 /DB_XREF=gi:15708752 /DB_XREF=603353512F1 /CLONE=IMAGE:5361050 /FEA=EST /CNT=4 /TID=Mm.206118.1 /TIER=ConsEnd /STK=4 /UG=Mm.206118 /UG_TITLE=ESTs, Moderately similar to voltage gated Na channel Scn8a (M.musculus)	79.1	526.45	316.75	2.12666e-05	82.3	75.9	523.1	529.8	309.3	324.2	Scn1a
1450120_at	gb:NM_018733.1 /DB_XREF=gi:9055327 /GEN=Scn1a /FEA=FLmRNA /CNT=29 /TID=Mm.142733.1 /TIER=FL /STK=2 /UG=Mm.142733 /LL=20265 /DEF=Mus musculus sodium channel, voltage-gated, type I, alpha polypeptide (Scn1a), mRNA. /PROD=sodium channel, voltage-gated, type I, alphapolypeptide /FL=gb:NM_018733.1 gb:L42339.1	217.4	1309.6	544.25	0.000317153	211.9	222.9	1265.6	1353.6	513.1	575.4	Scn1a
1452089_at	gb:AW106929 /DB_XREF=gi:6077729 /DB_XREF=um34d04.x1 /CLONE=IMAGE:2236423 /FEA=FLmRNA /CNT=79 /TID=Mm.28404.1 /TIER=Stack /STK=71 /UG=Mm.28404 /UG_TITLE=Mus musculus, clone MGC:31529 IMAGE:4501980, mRNA, complete cds /FL=gb:BC026479.1	891.75	2582.7	2049.45	0.000158161	918.1	865.4	2531.8	2633.6	2016.3	2082.6	Cacnb4
1456119_at	gb:AV334671 /DB_XREF=gi:16396307 /DB_XREF=AV334671 /CLONE=6330563B19 /FEA=EST /CNT=30 /TID=Mm.101058.1 /TIER=Stack /STK=15 /UG=Mm.101058 /LL=101677 /UG_GENE=AI850523 /UG_TITLE=expressed sequence AI850523	1043.2	2978.85	2713	0.000202509	1065.5	1020.9	3023.2	2934.5	2784.8	2641.2	Grm5
1456863_at	gb:AI385584 /DB_XREF=gi:4199047 /DB_XREF=mb18d08.x1 /CLONE=IMAGE:329775 /FEA=EST /CNT=7 /TID=Mm.200233.1 /TIER=ConsEnd /STK=7 /UG=Mm.200233 /LL=98323 /UG_GENE=AI385584 /UG_TITLE=expressed sequence AI385584	97.7	840.75	305.15	0.00114353	98.7	96.7	897	784.5	314.4	295.9	Epha4
